# Supplementary material for: Analogous Convergence of Sustained and Transient Inputs in Parallel On and Off Pathways for Retinal Motion Computation
Source: PubMed Central journal article supplement (PMC6404534; doi:10.1016/j.celrep.2016.02.001), 2016-02-18

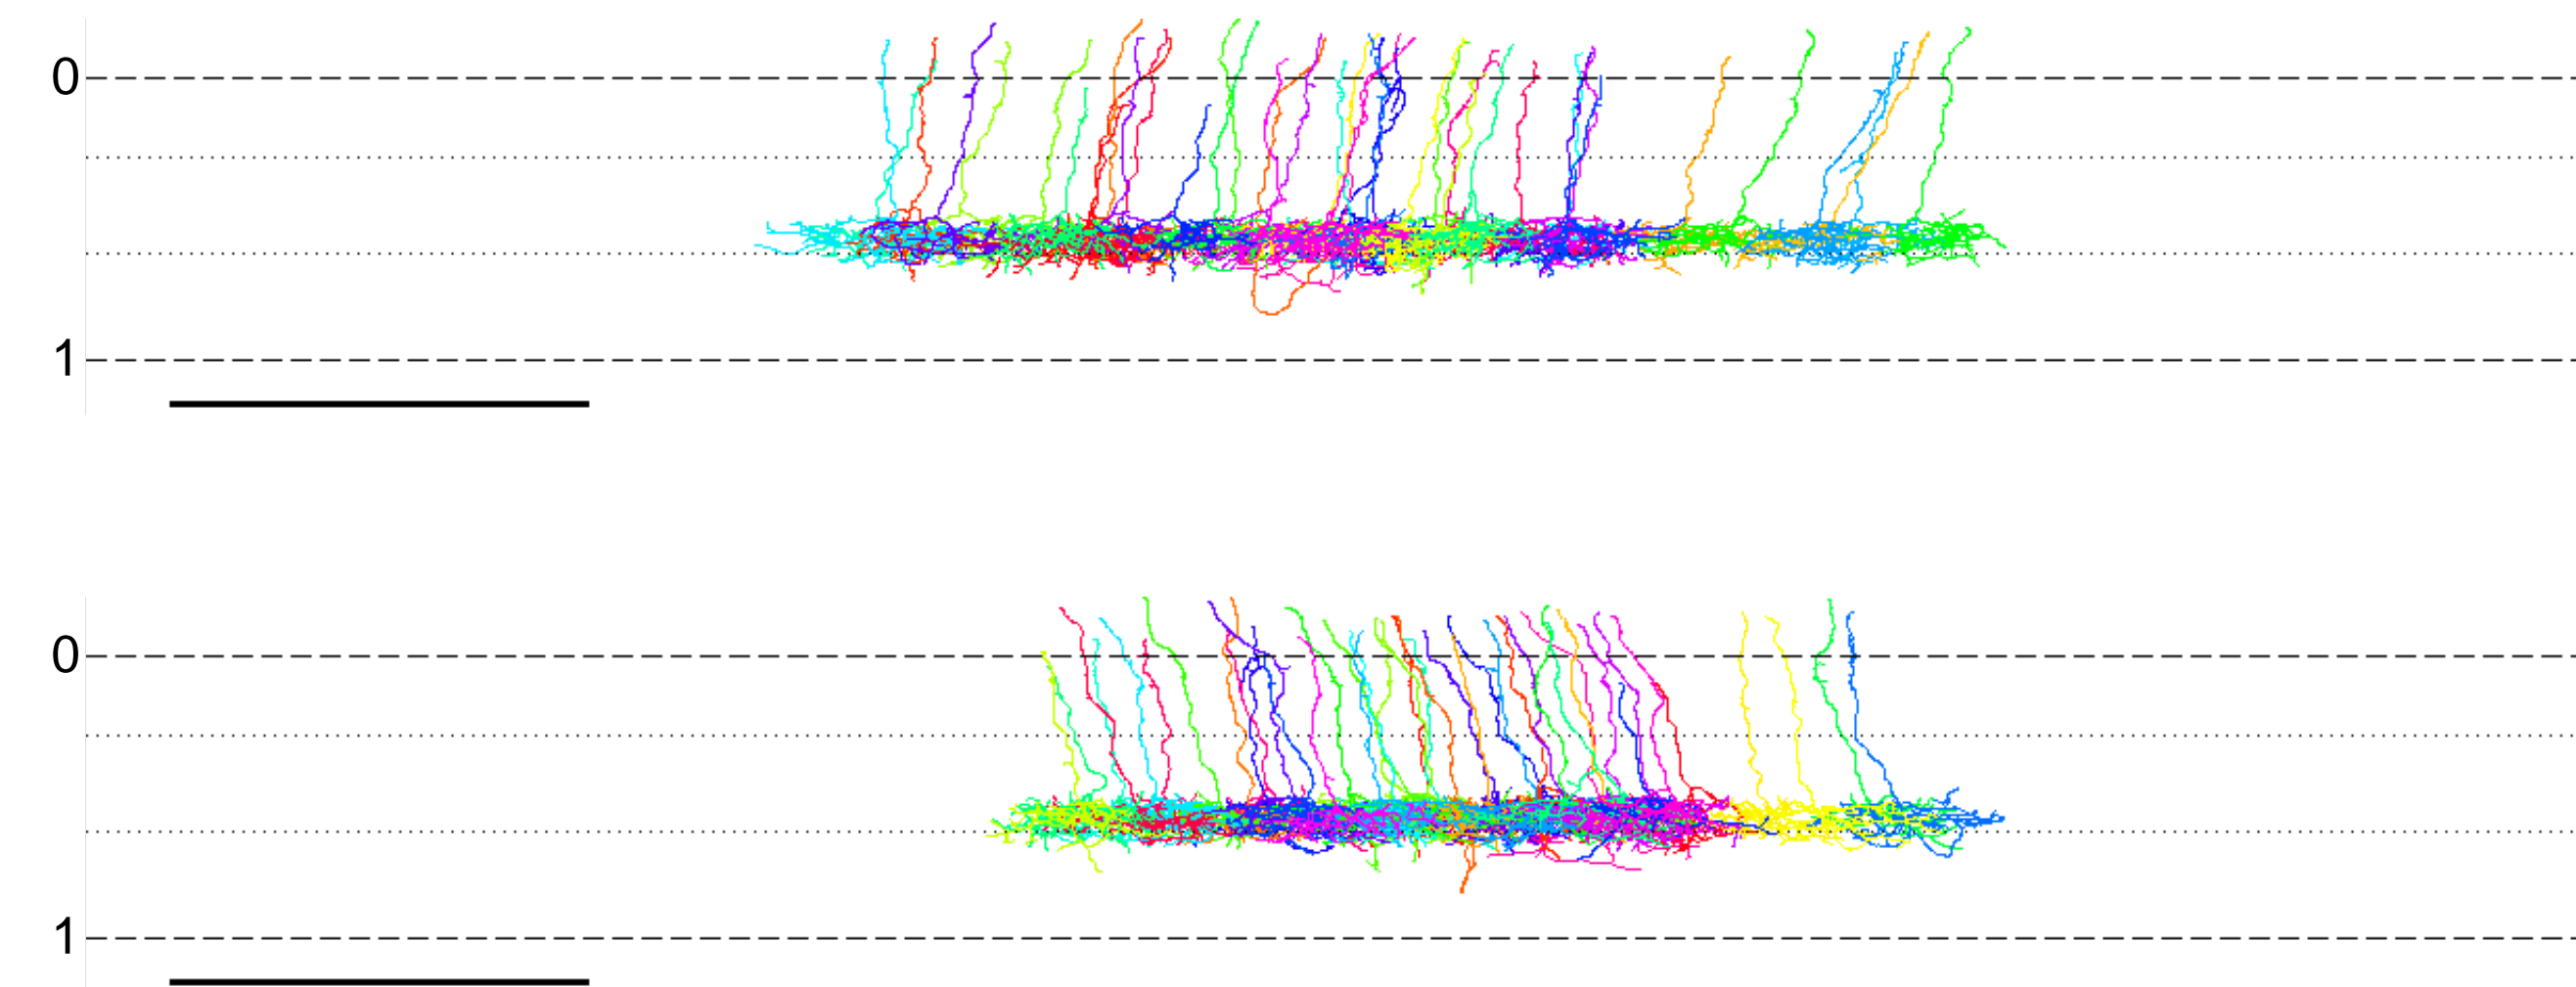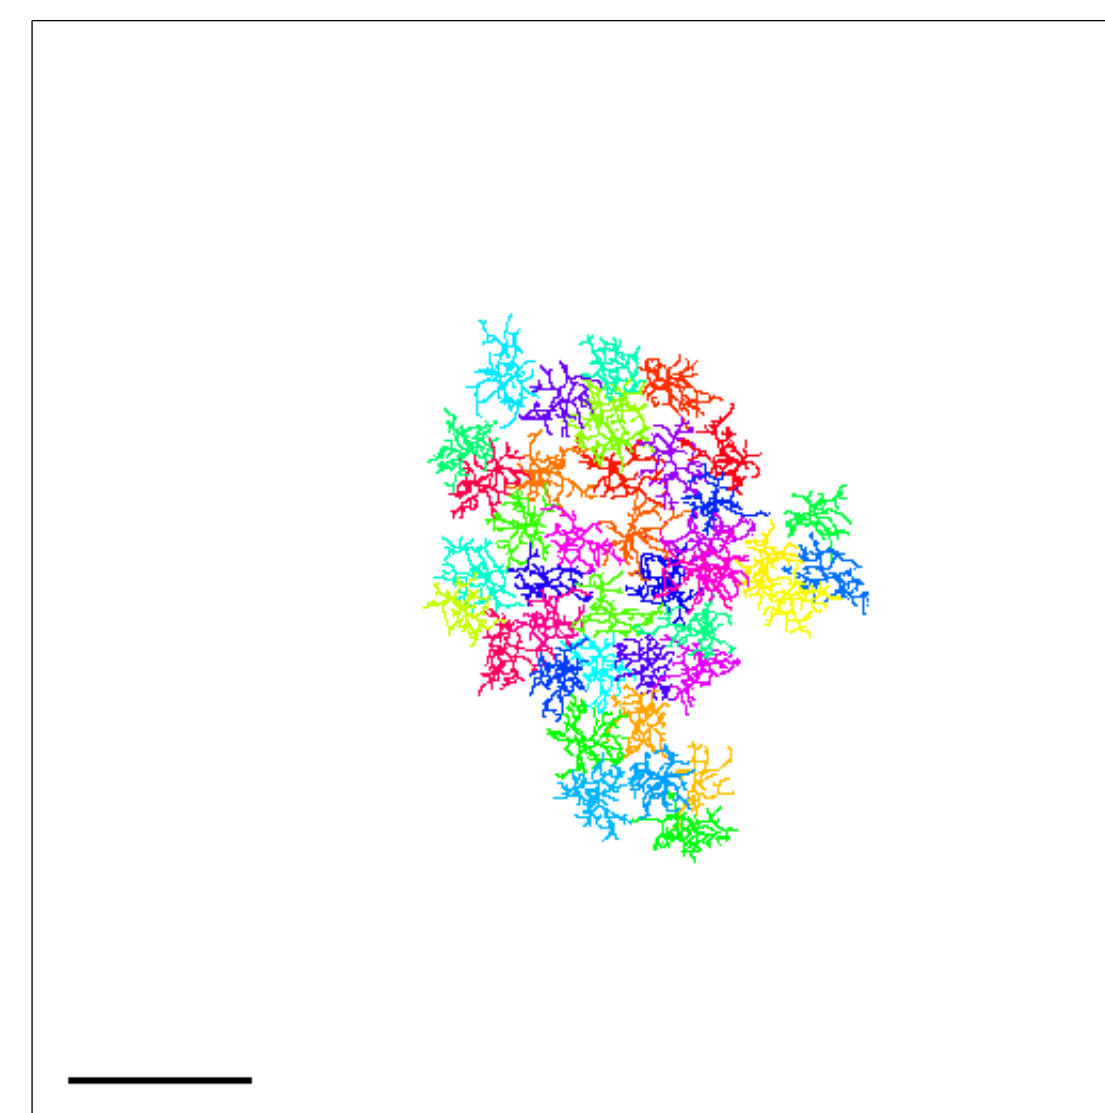

BC5i

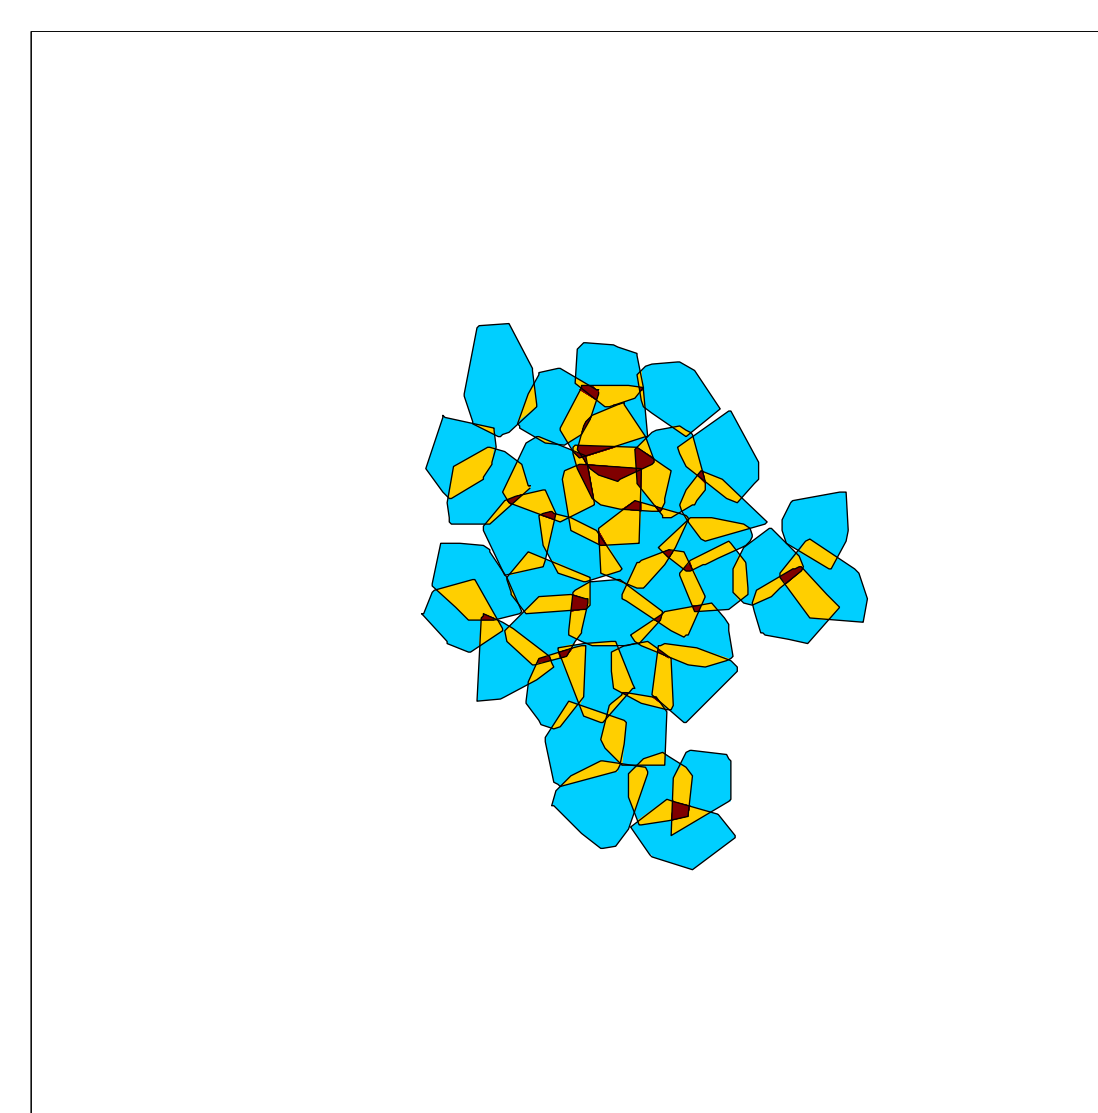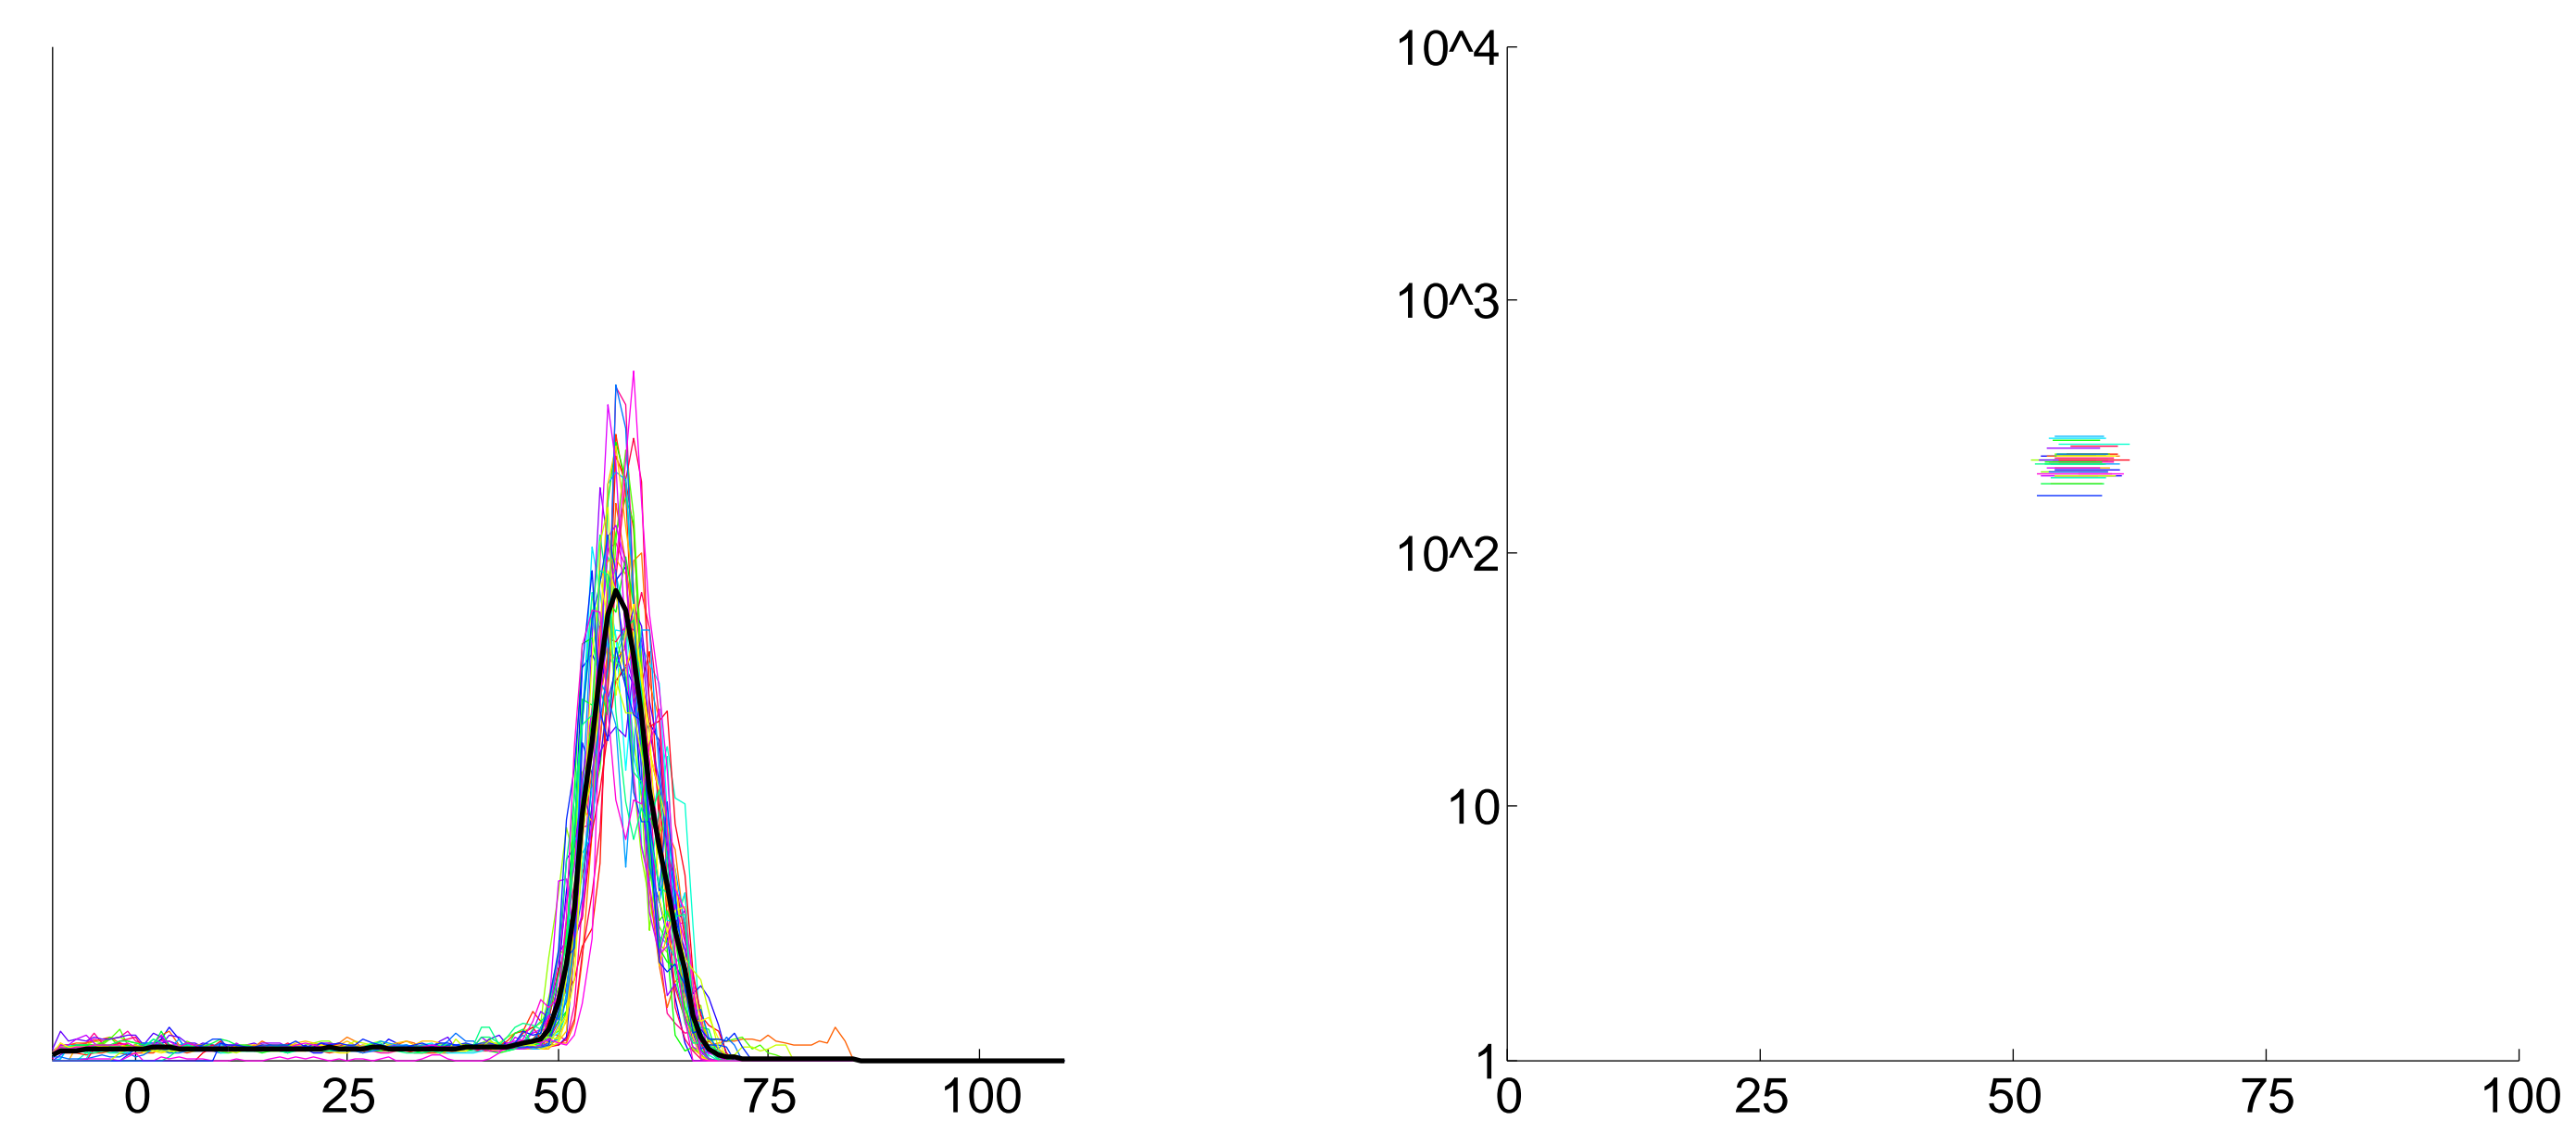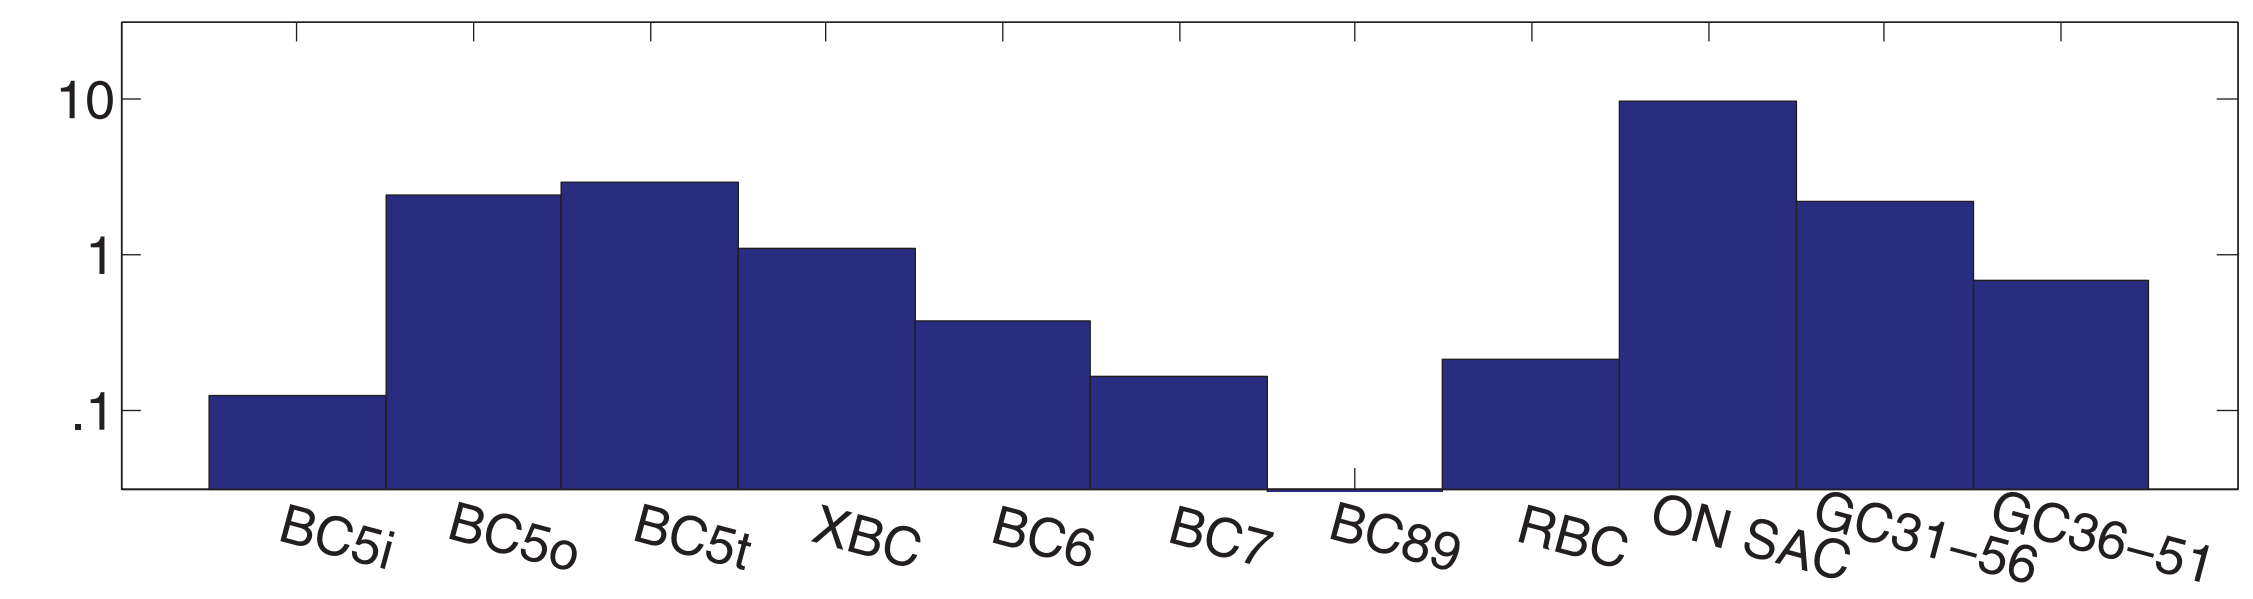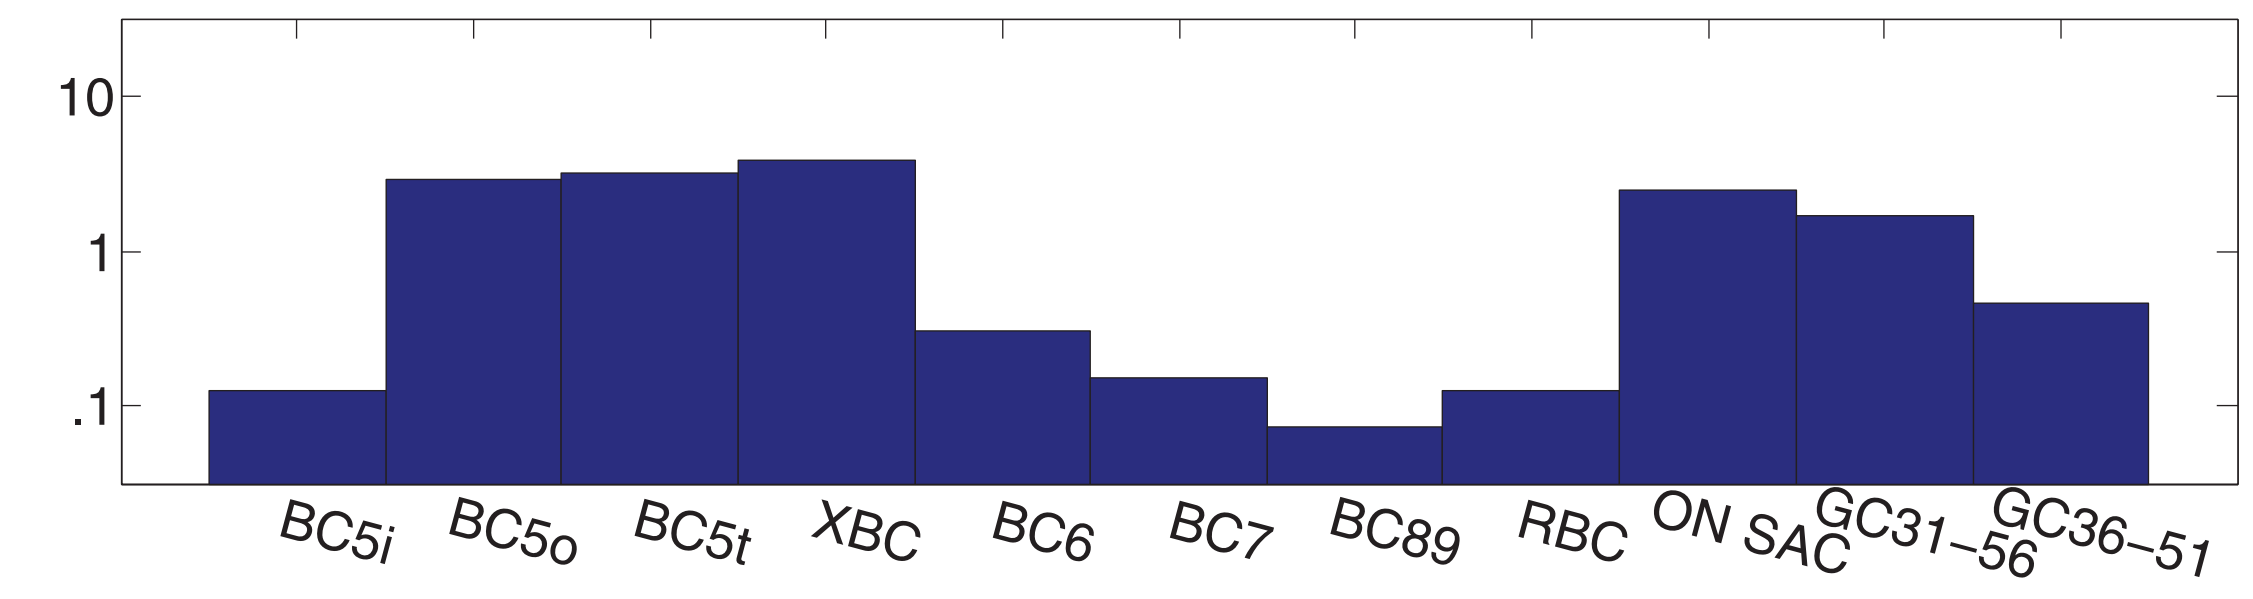

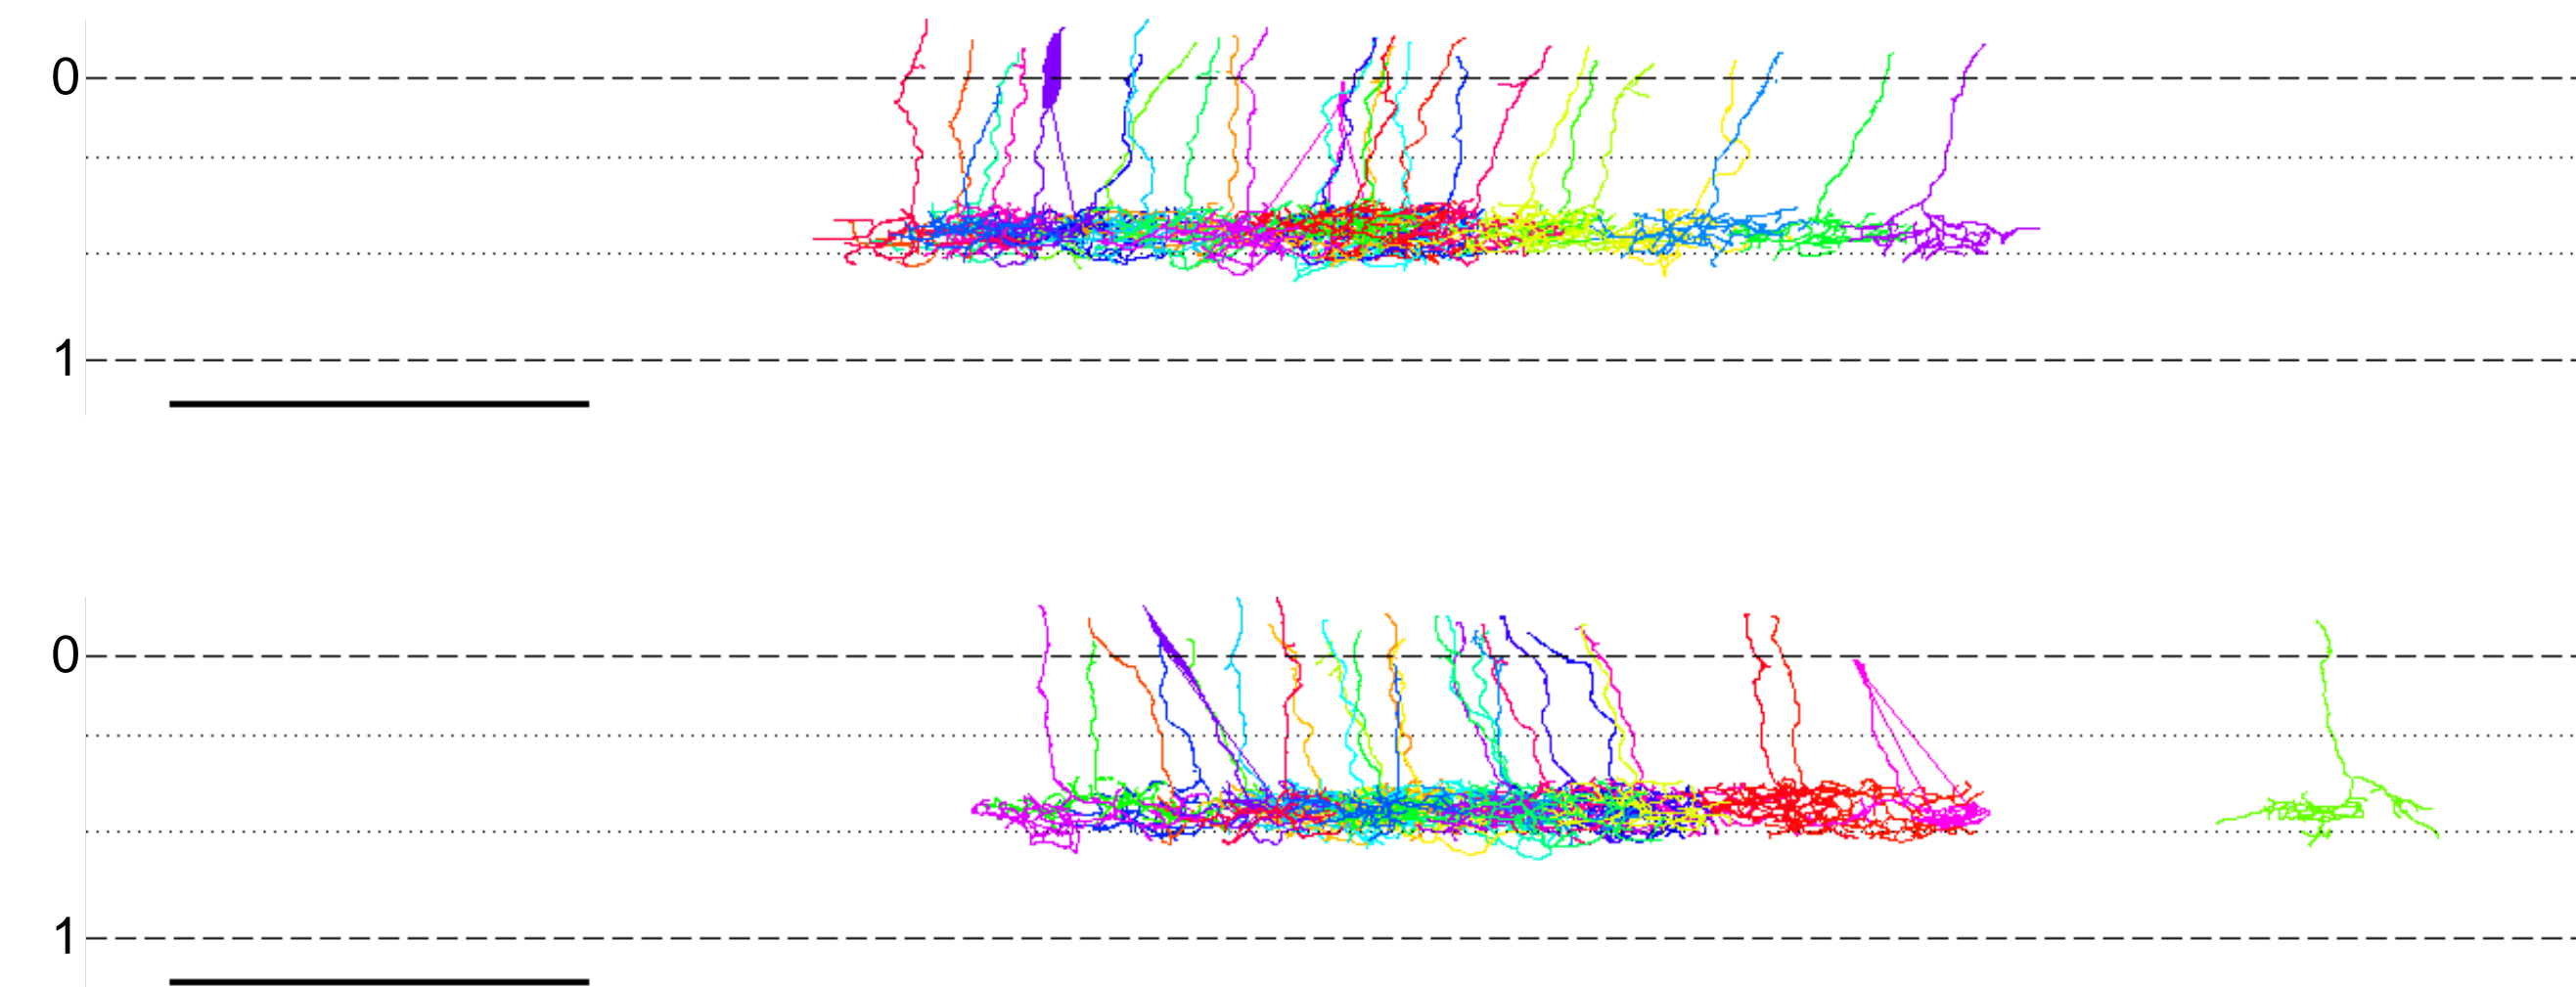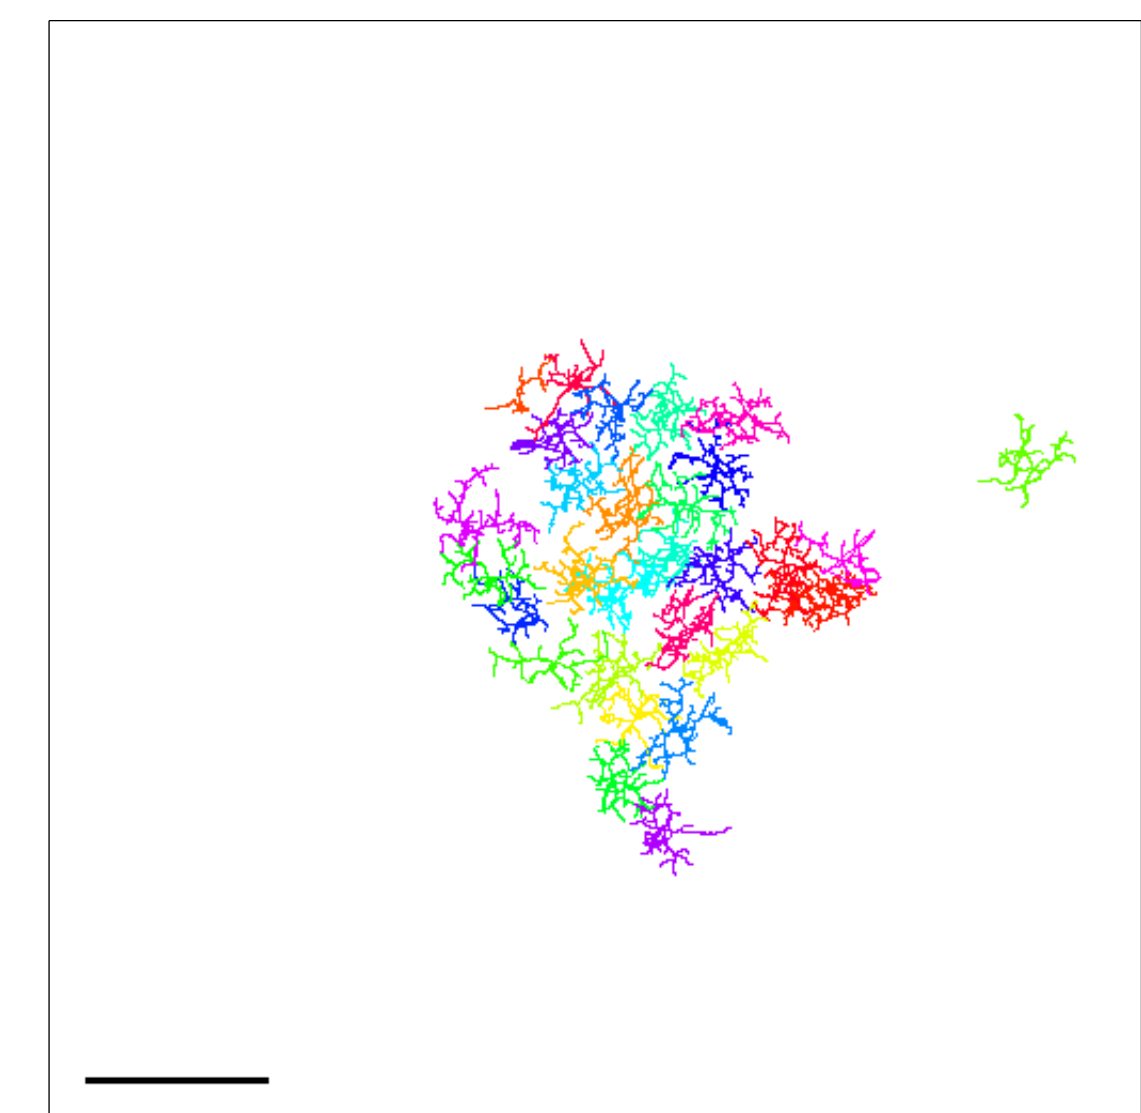

BC5o

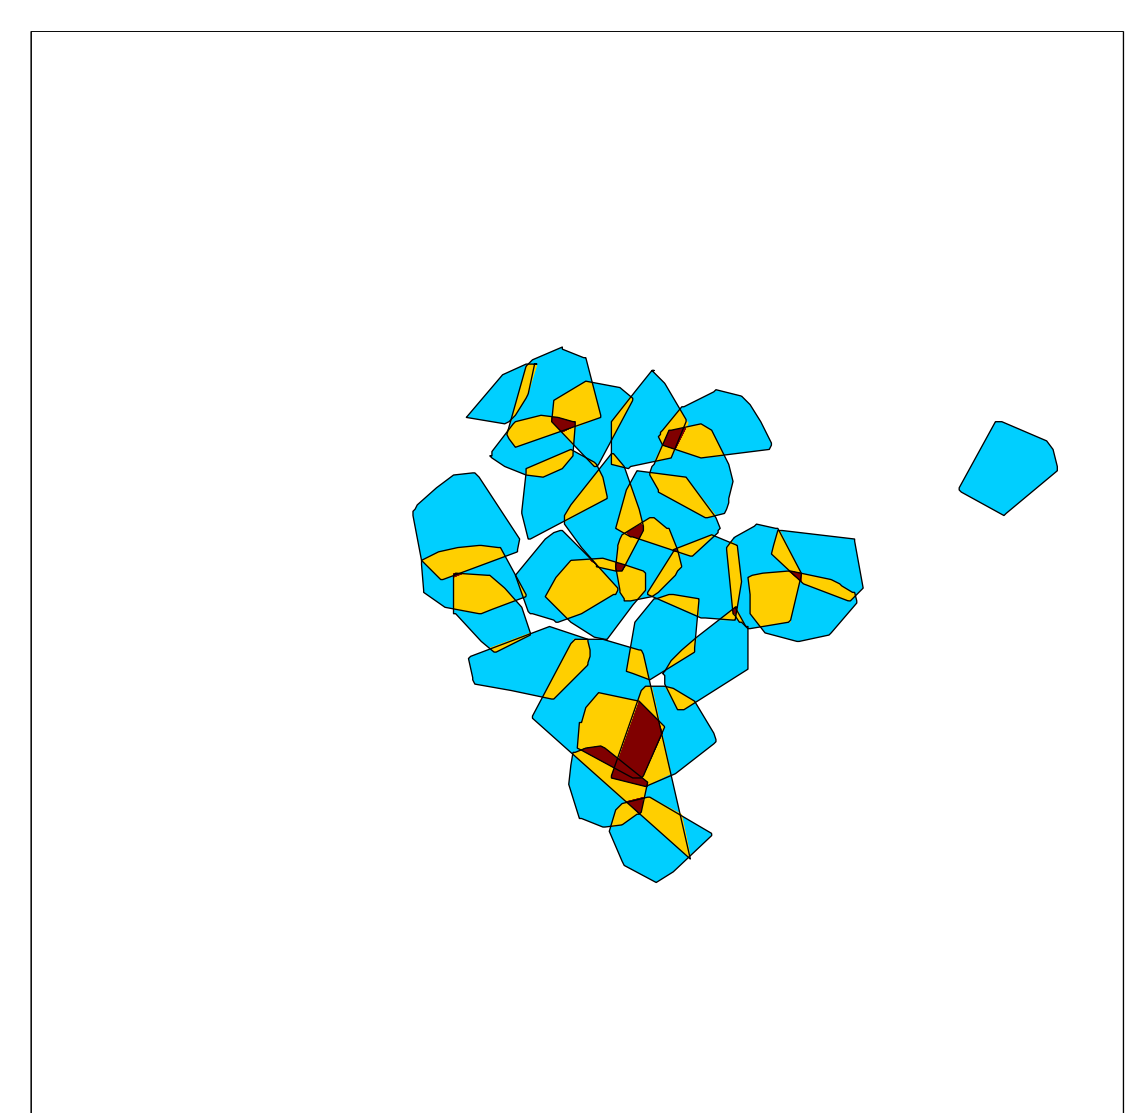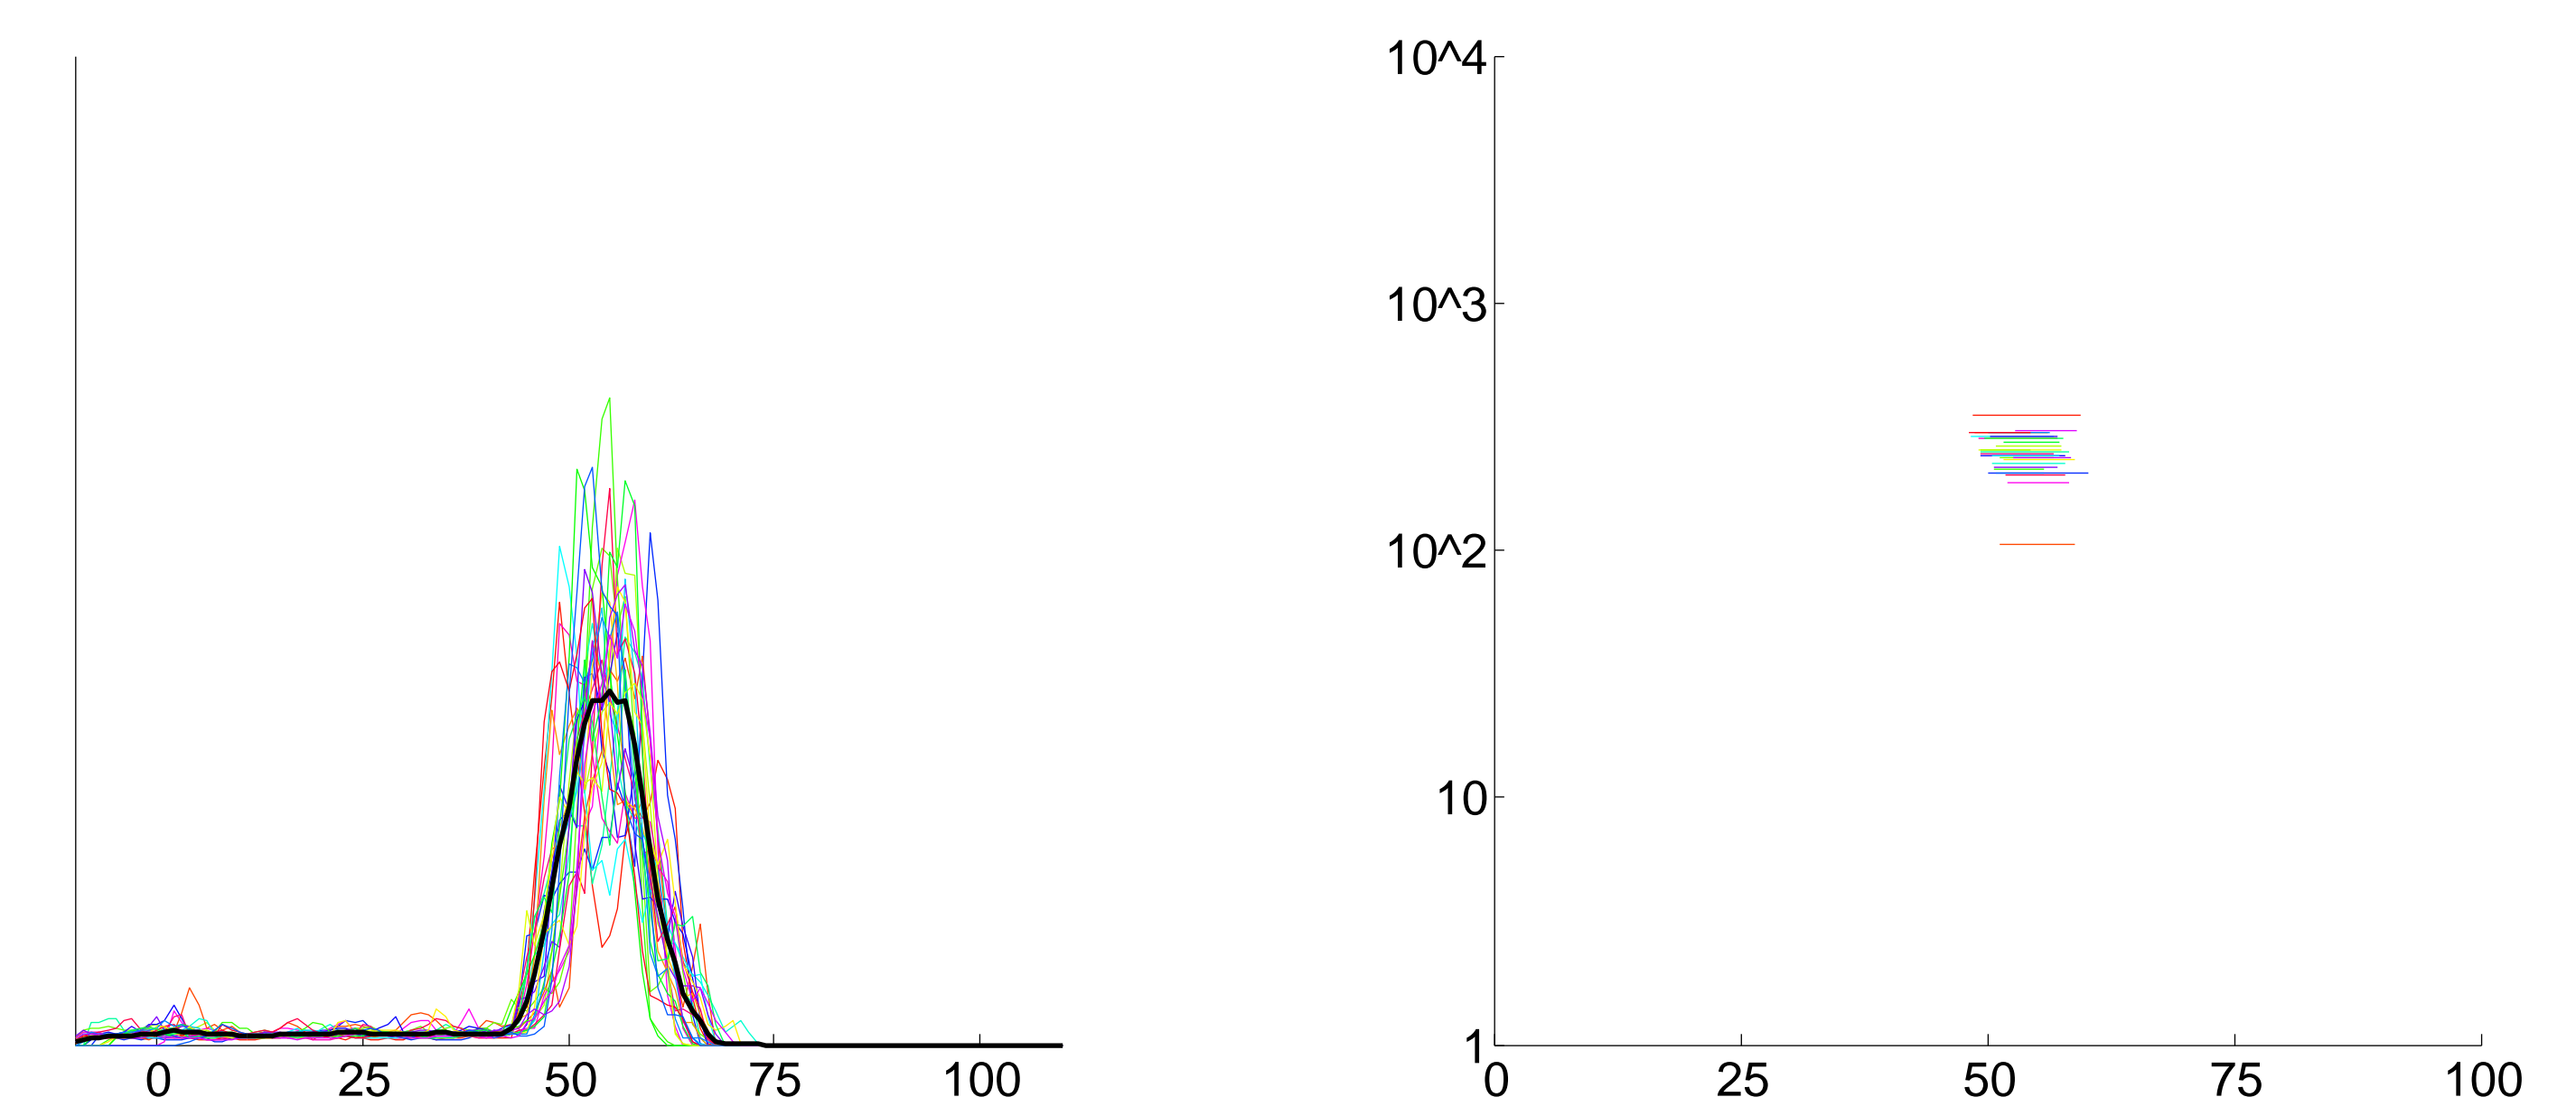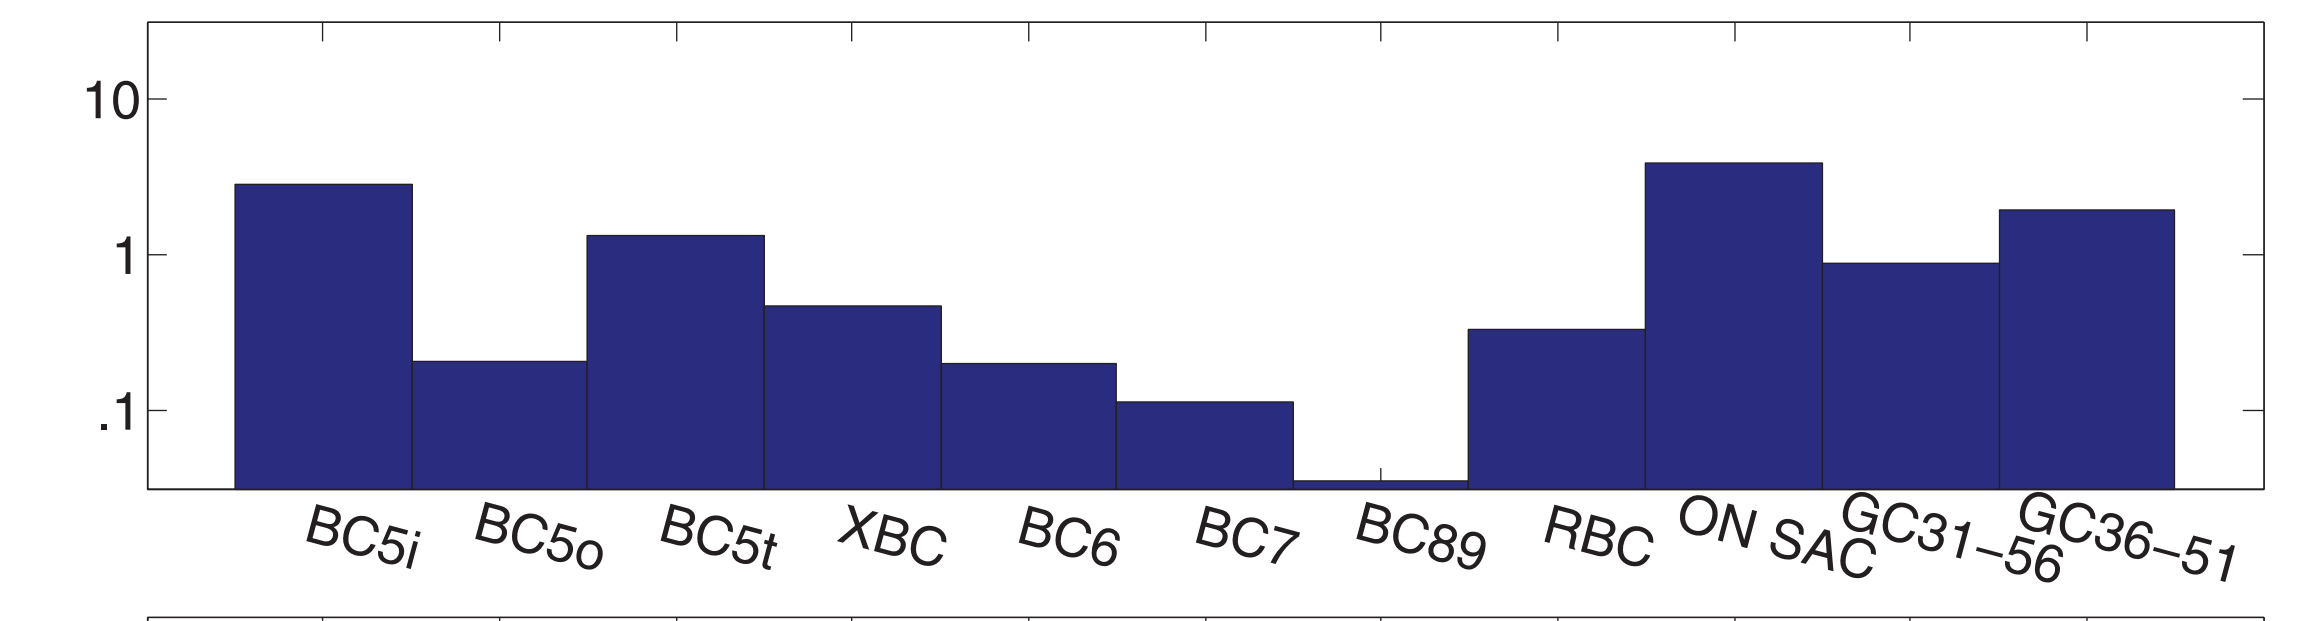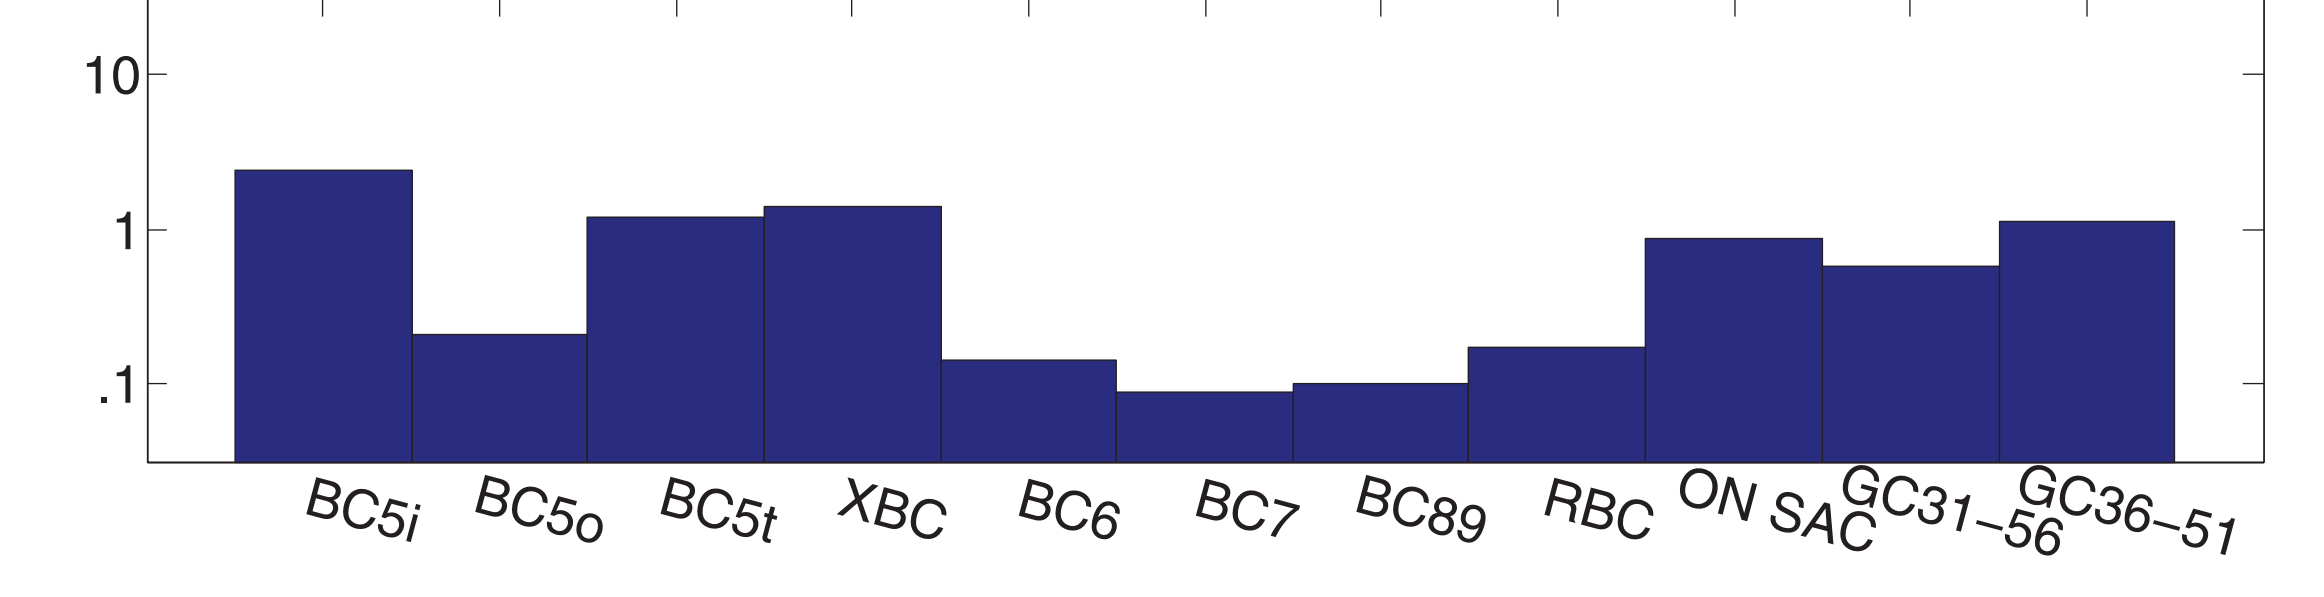

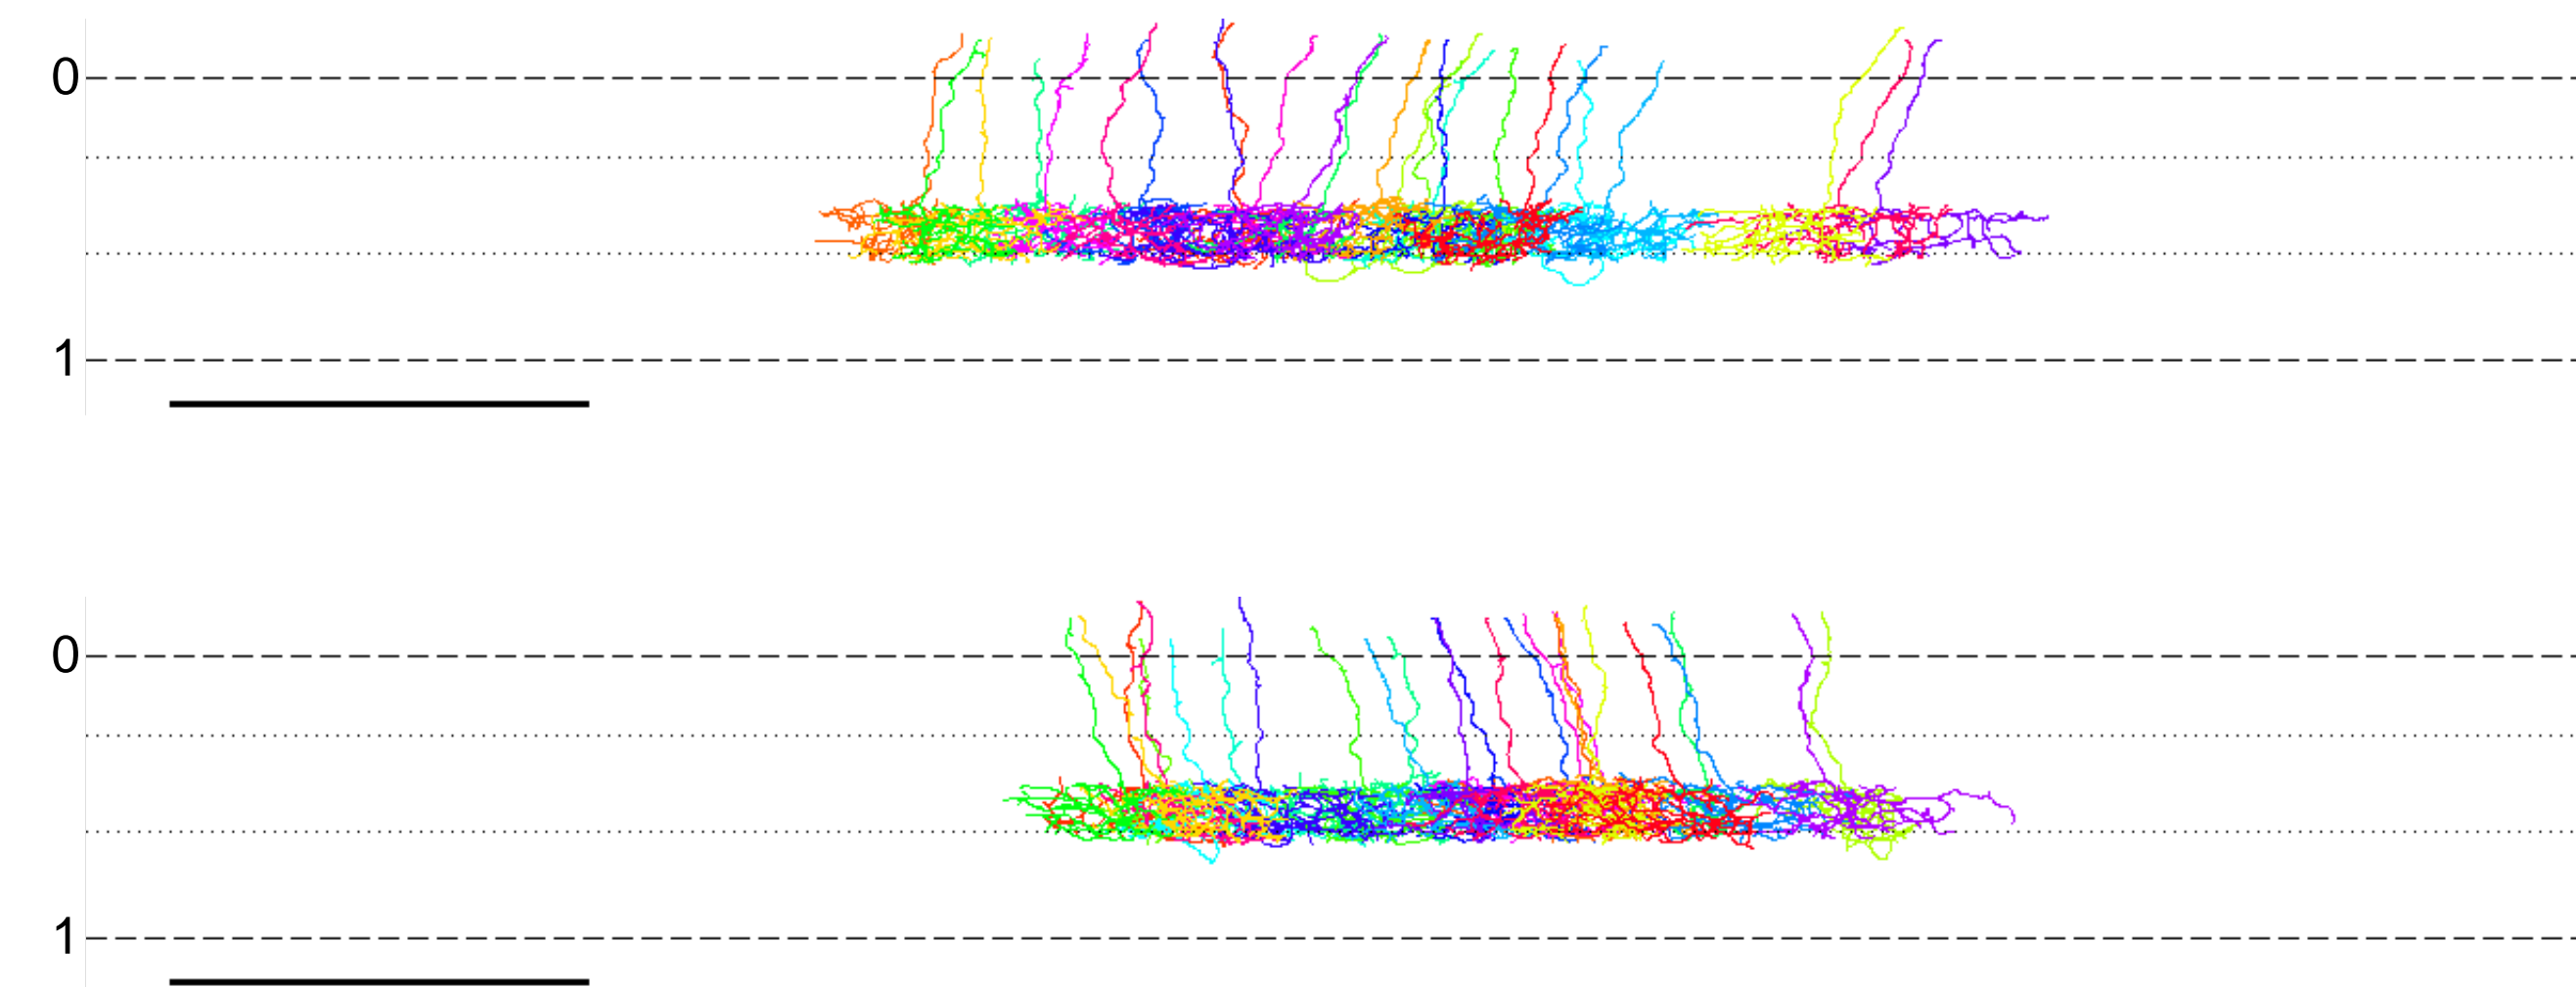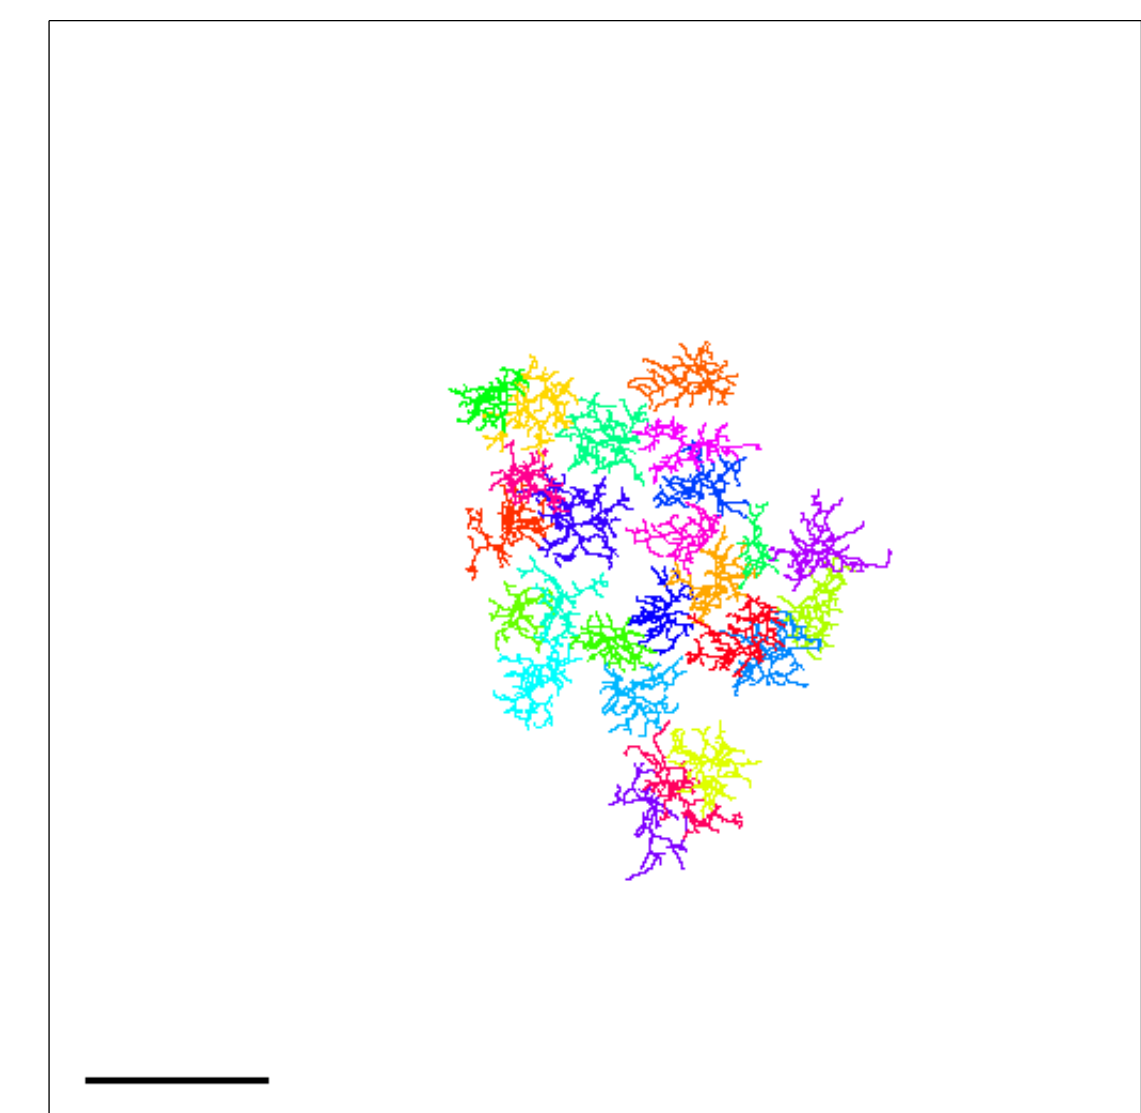

BC5t

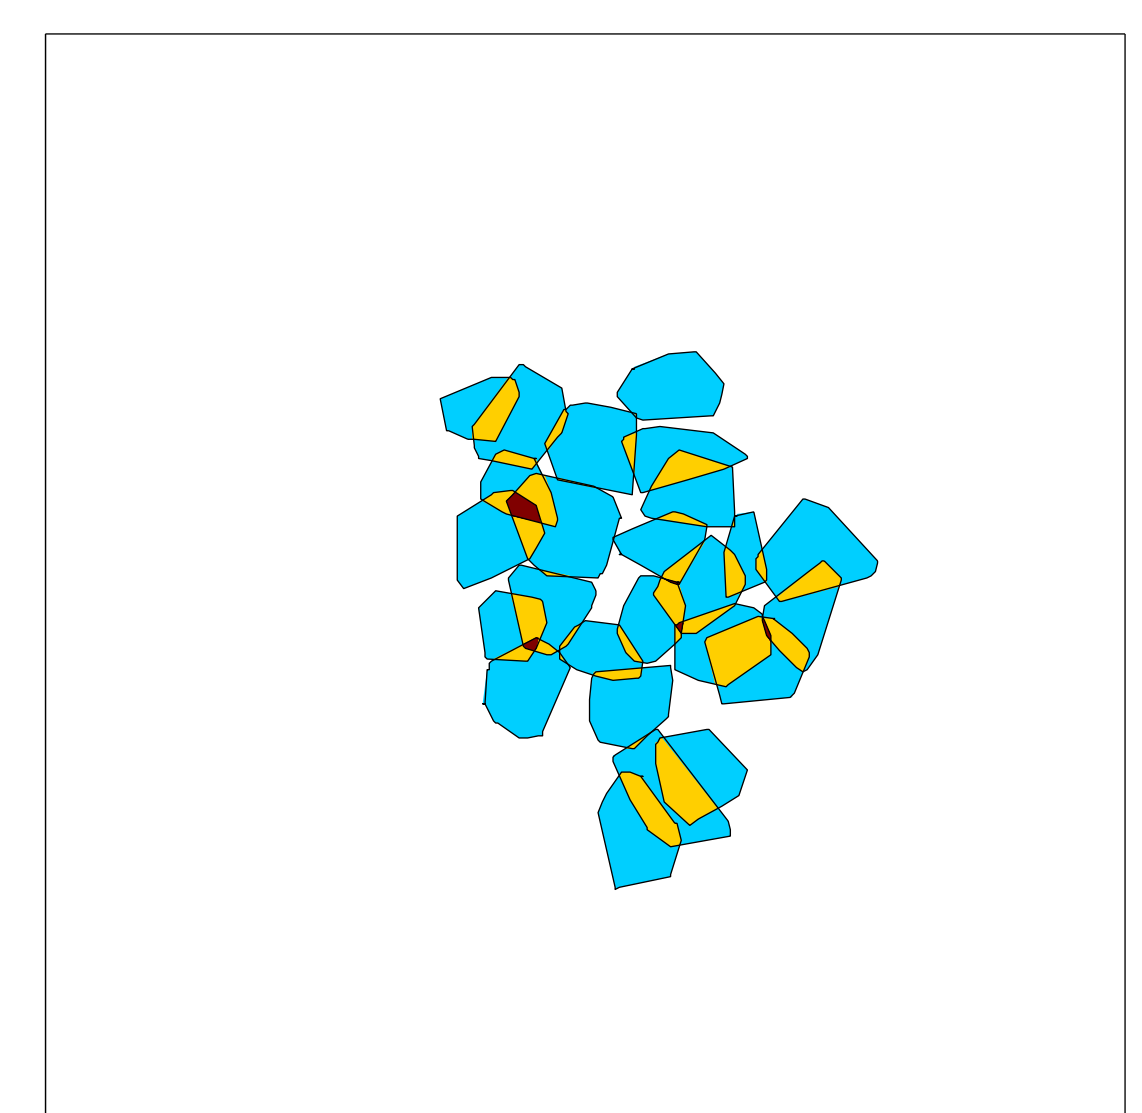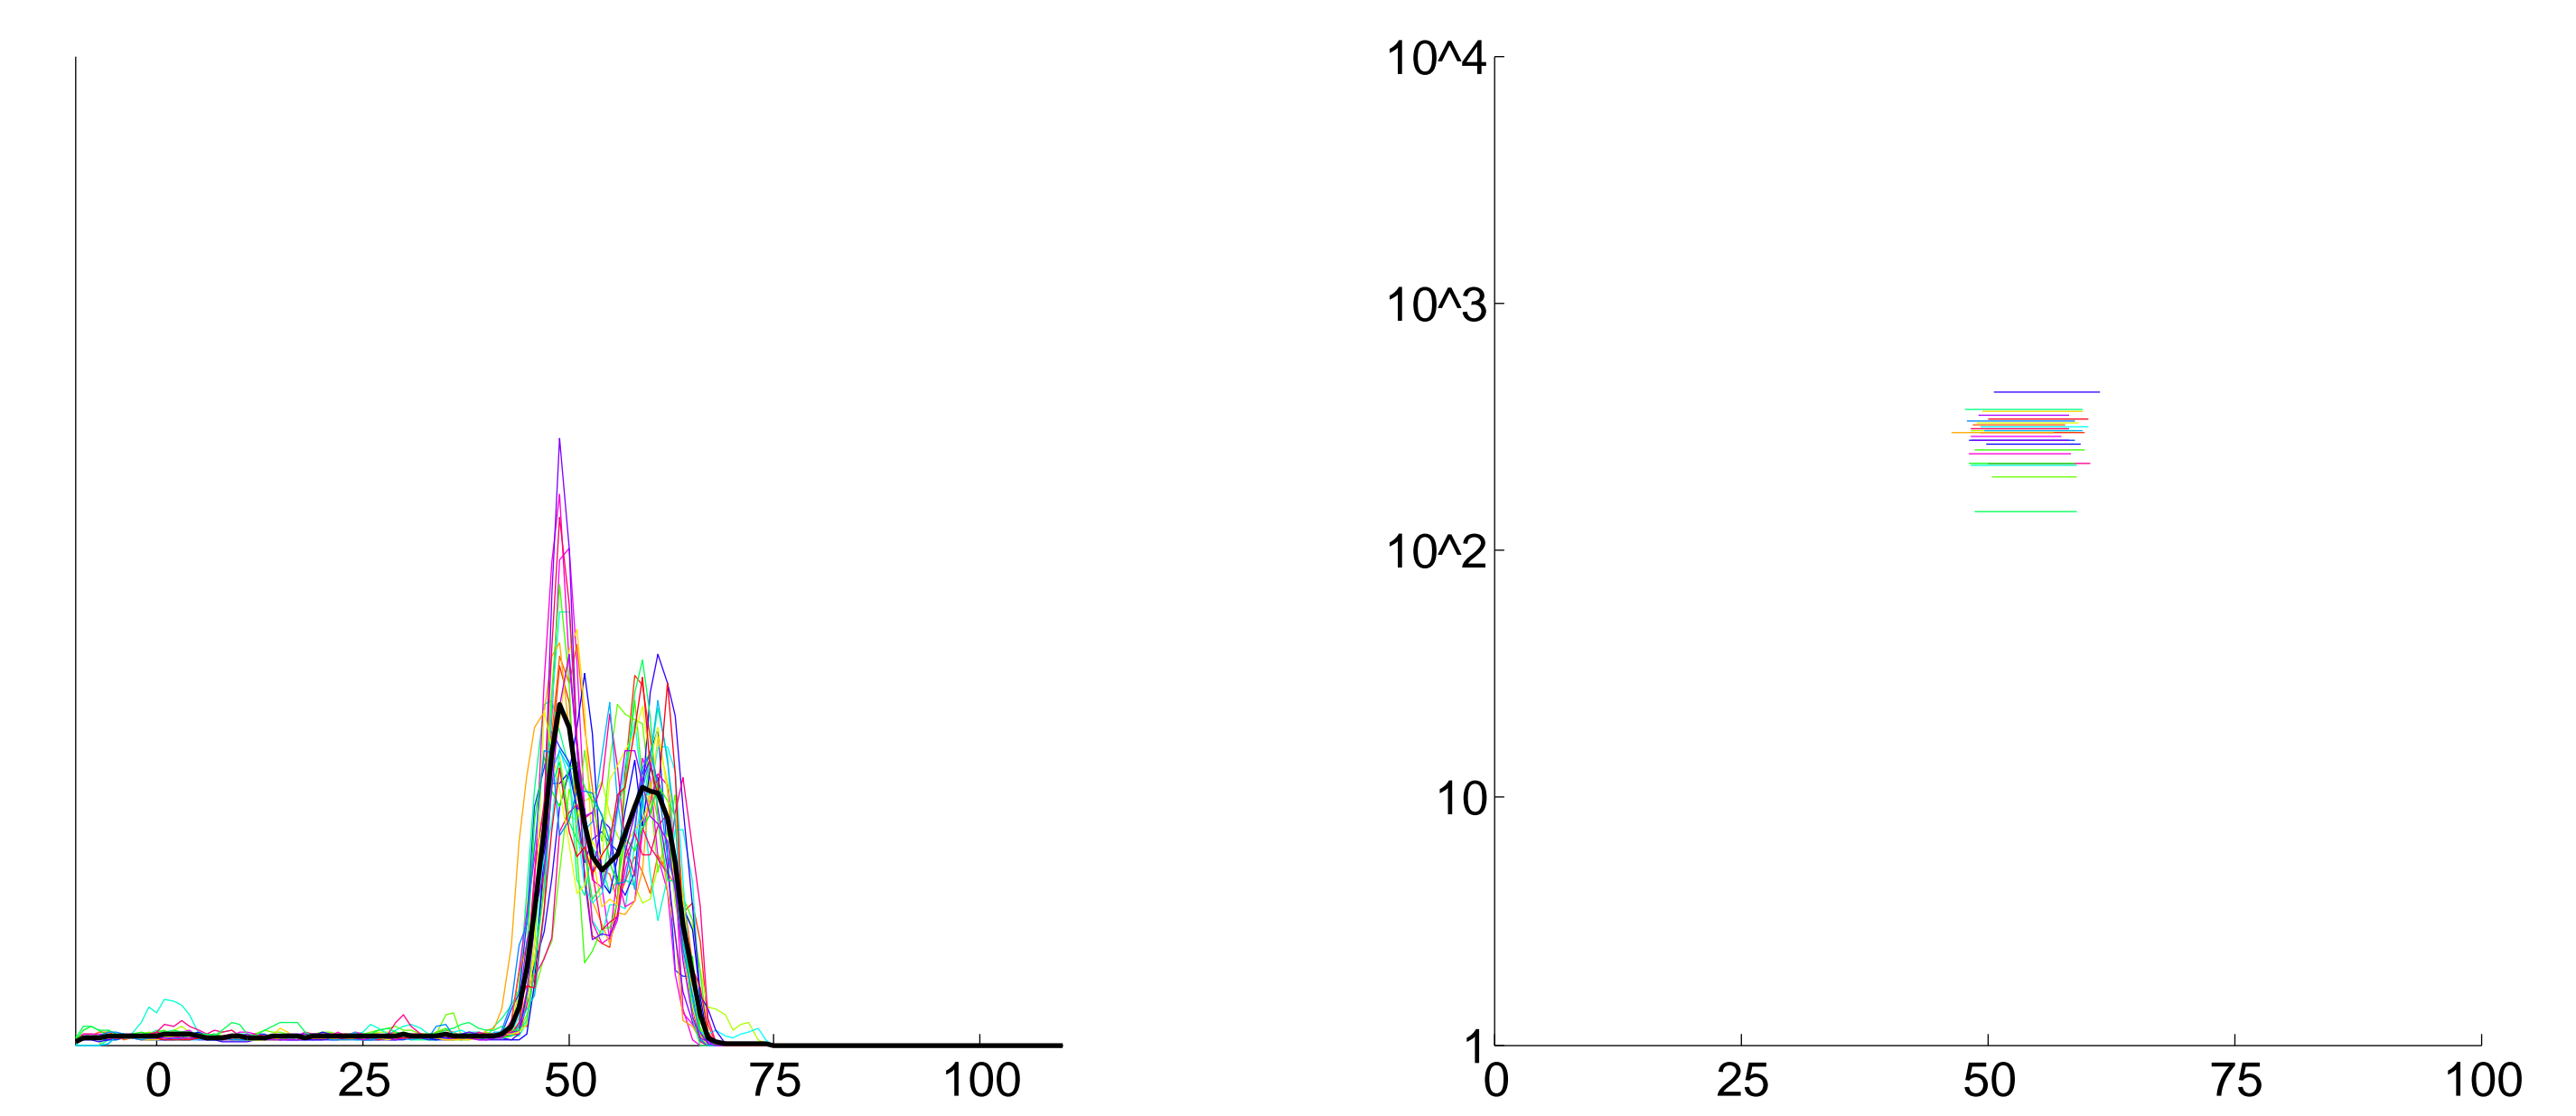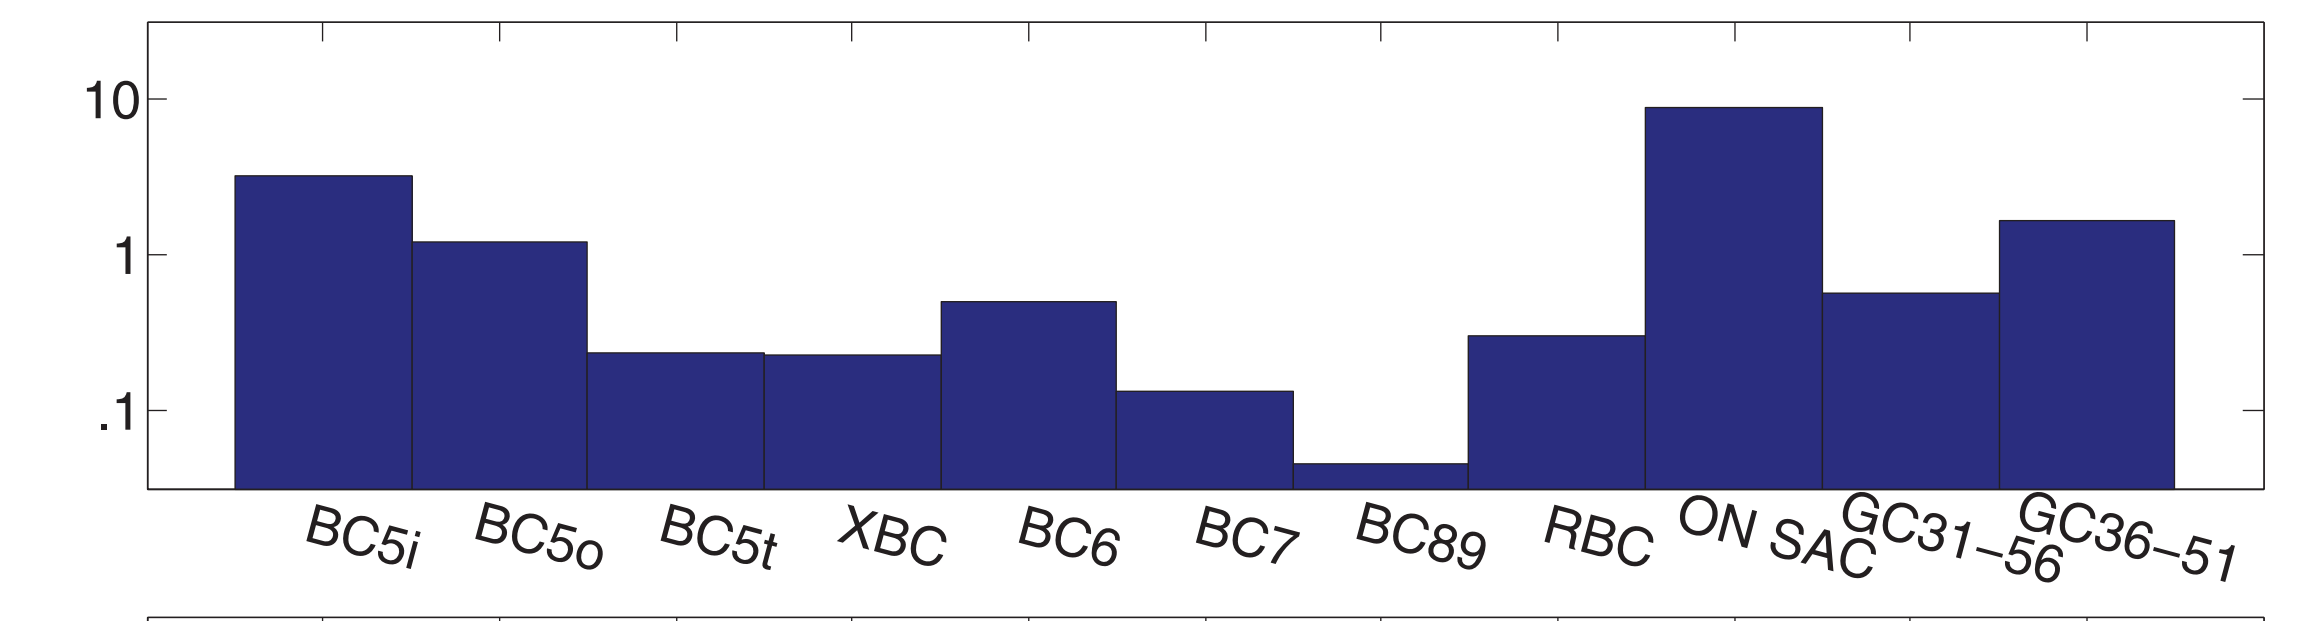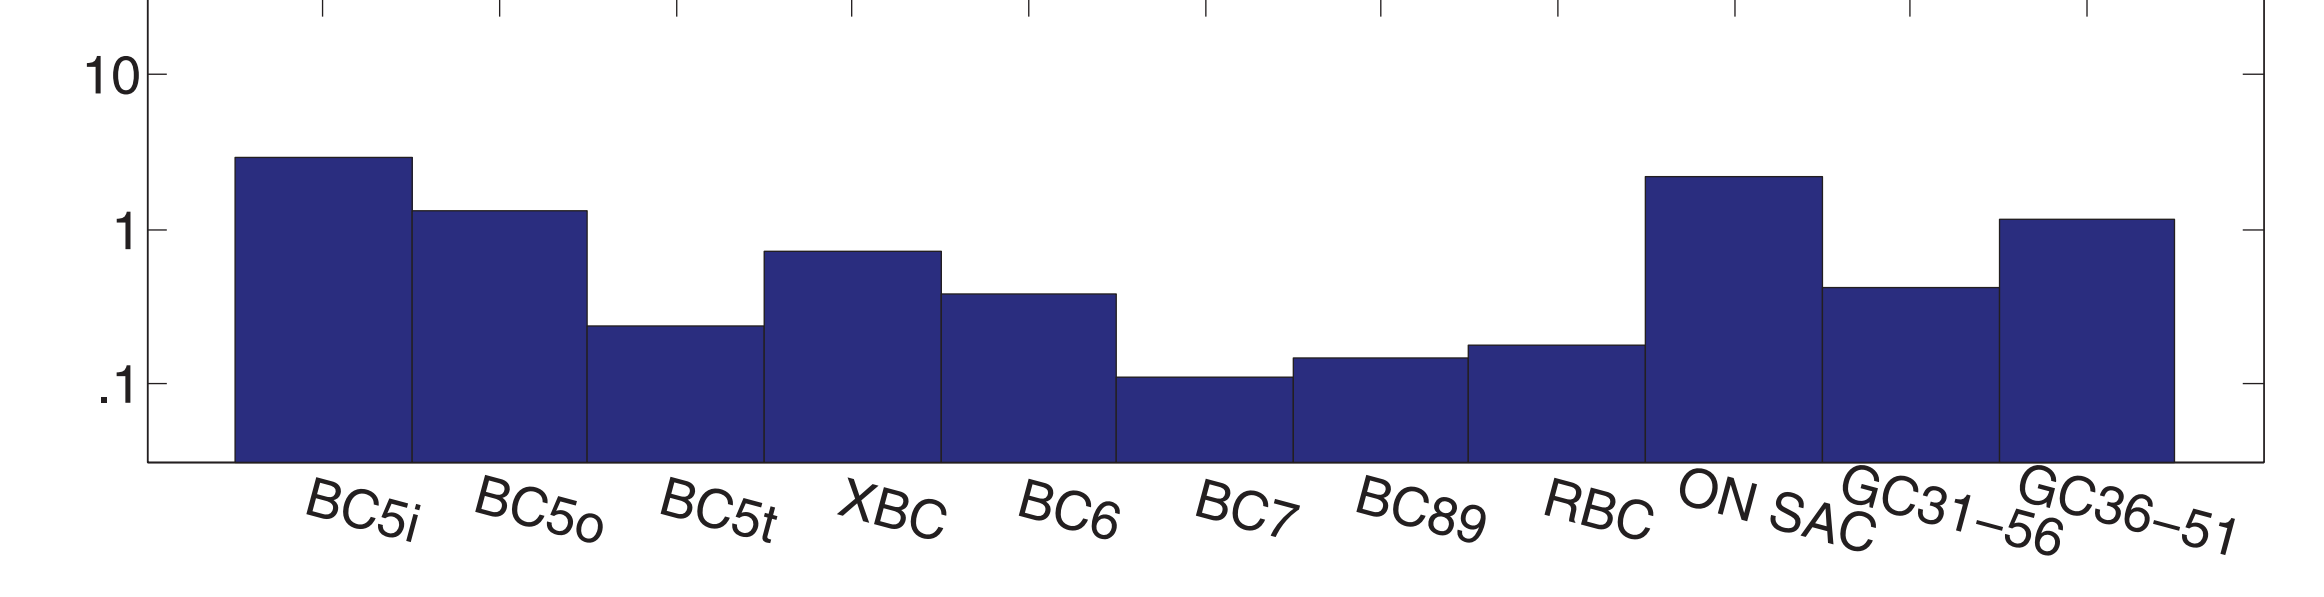

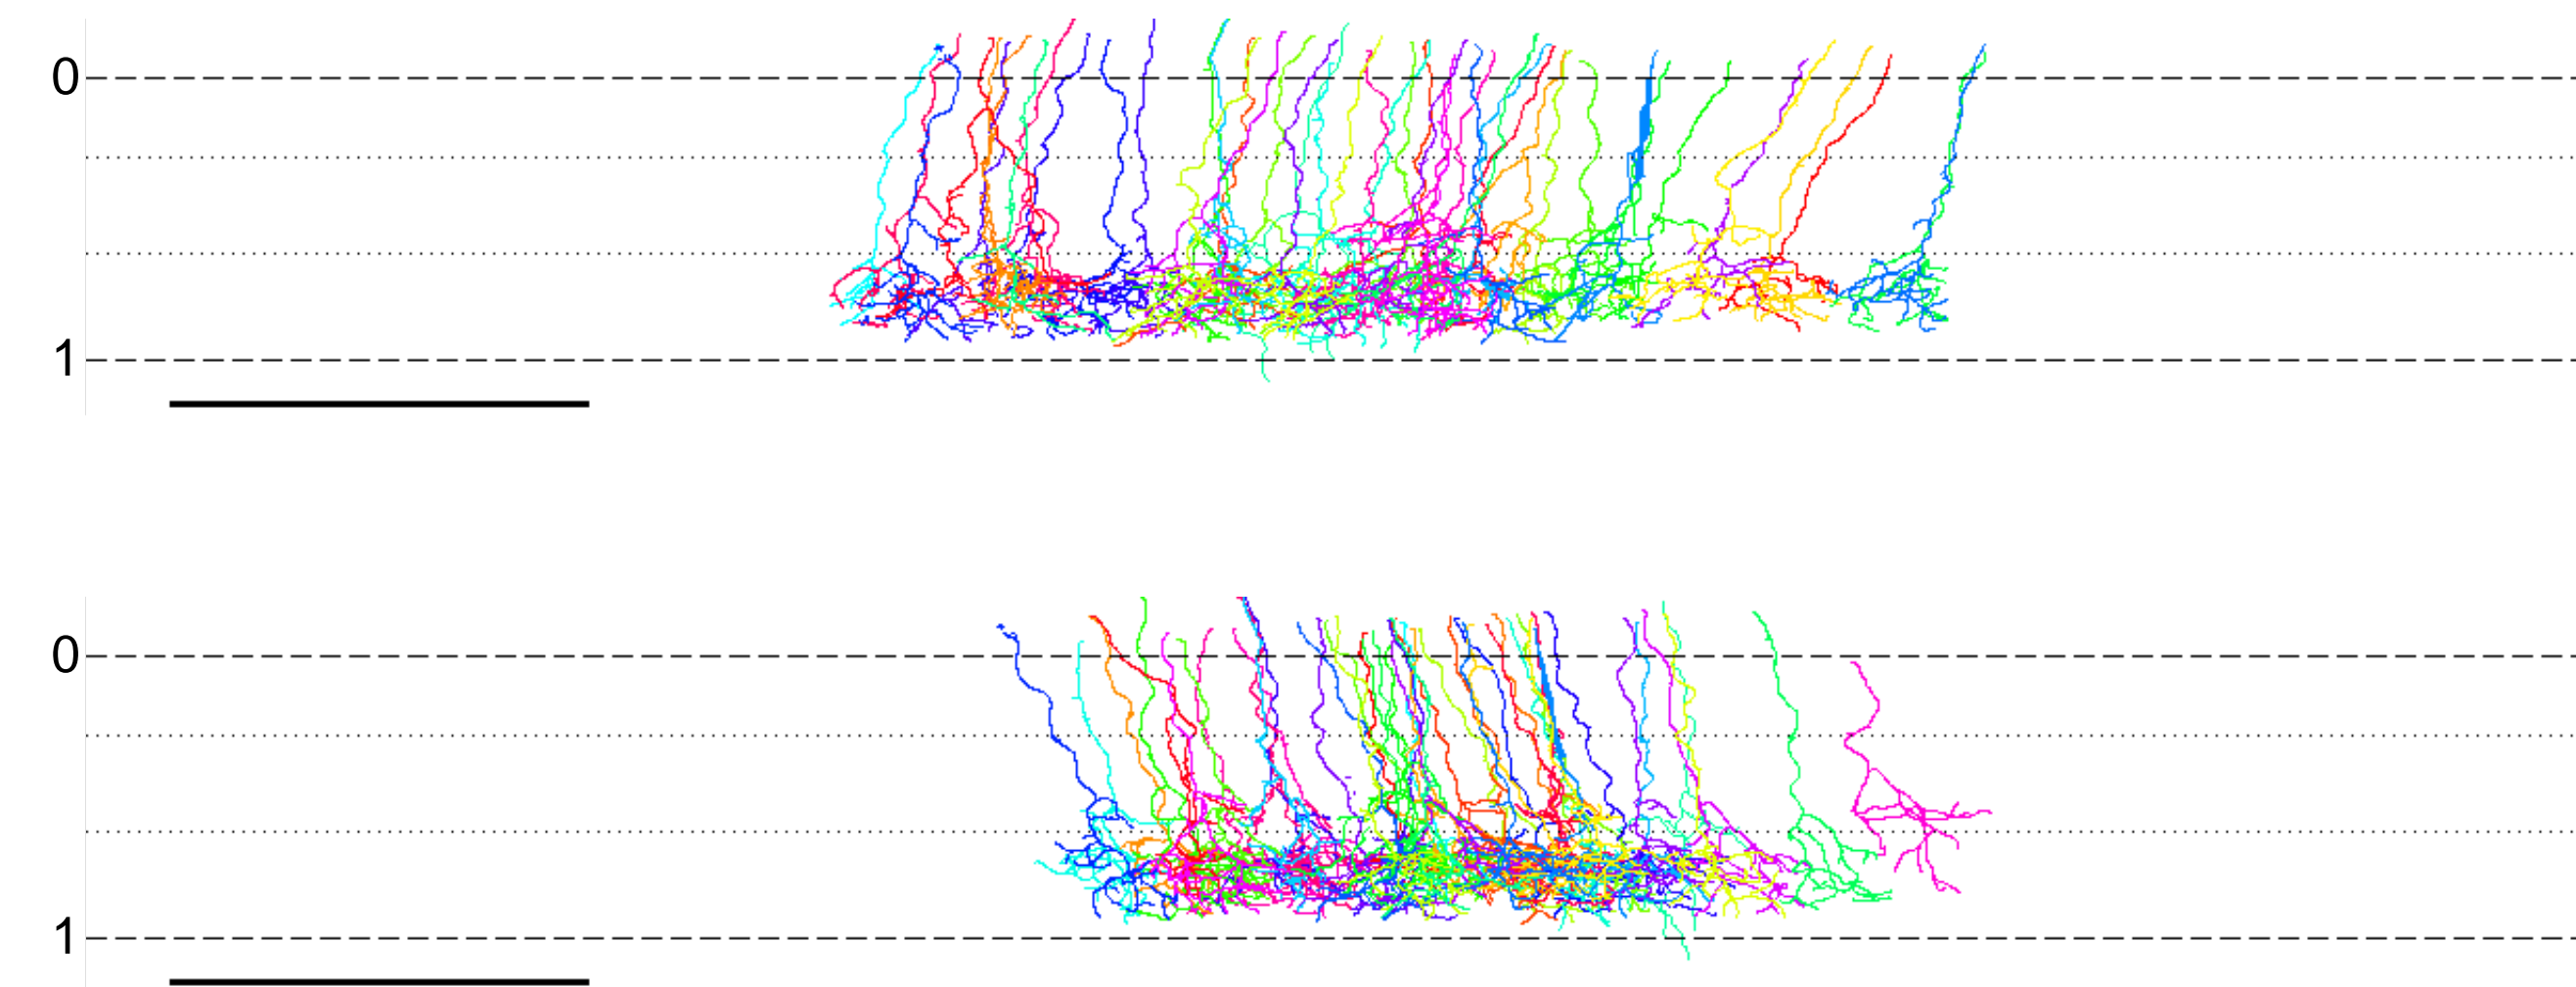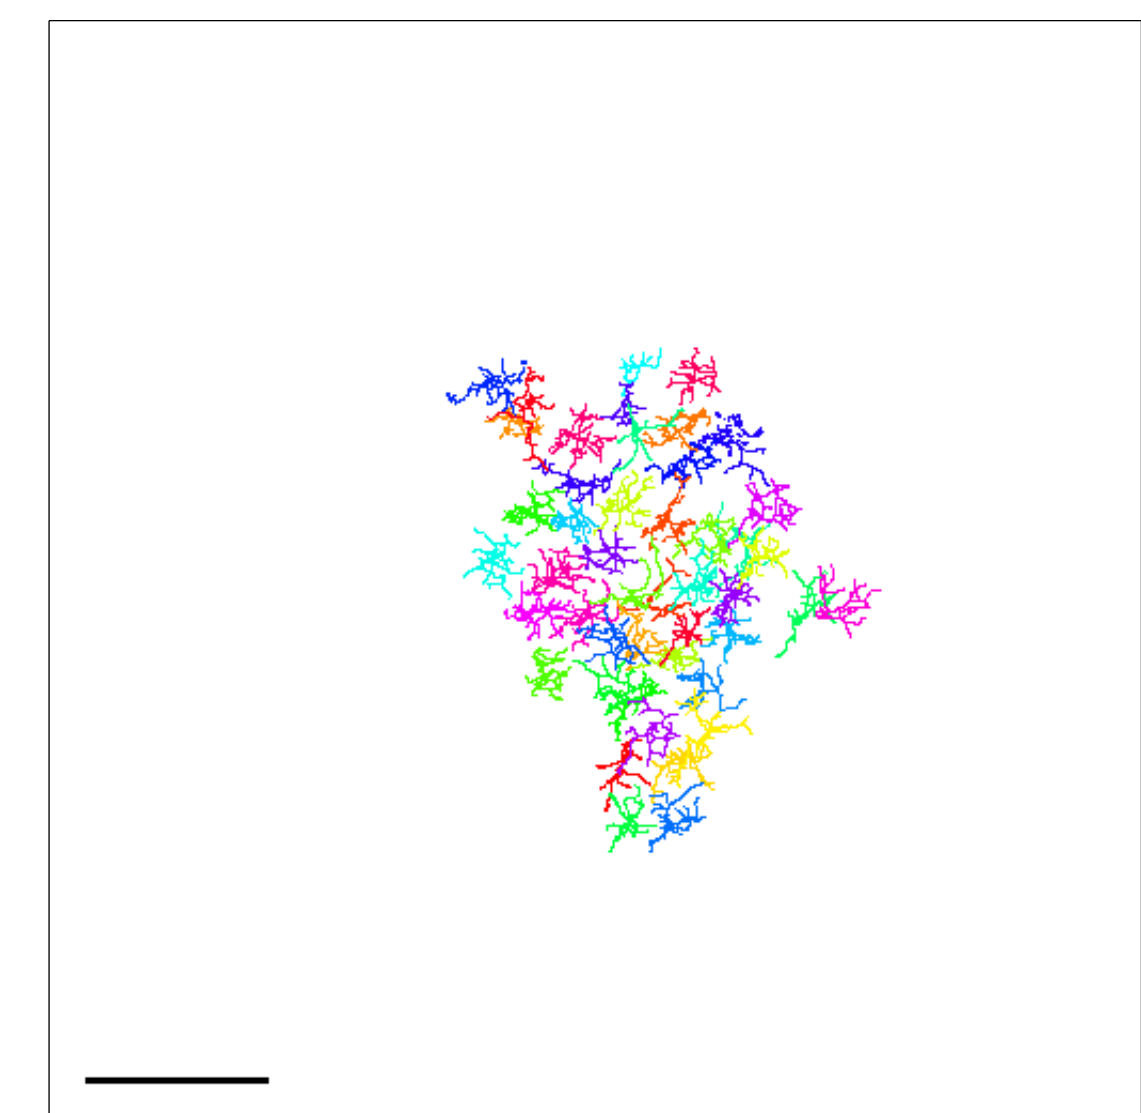

BC6

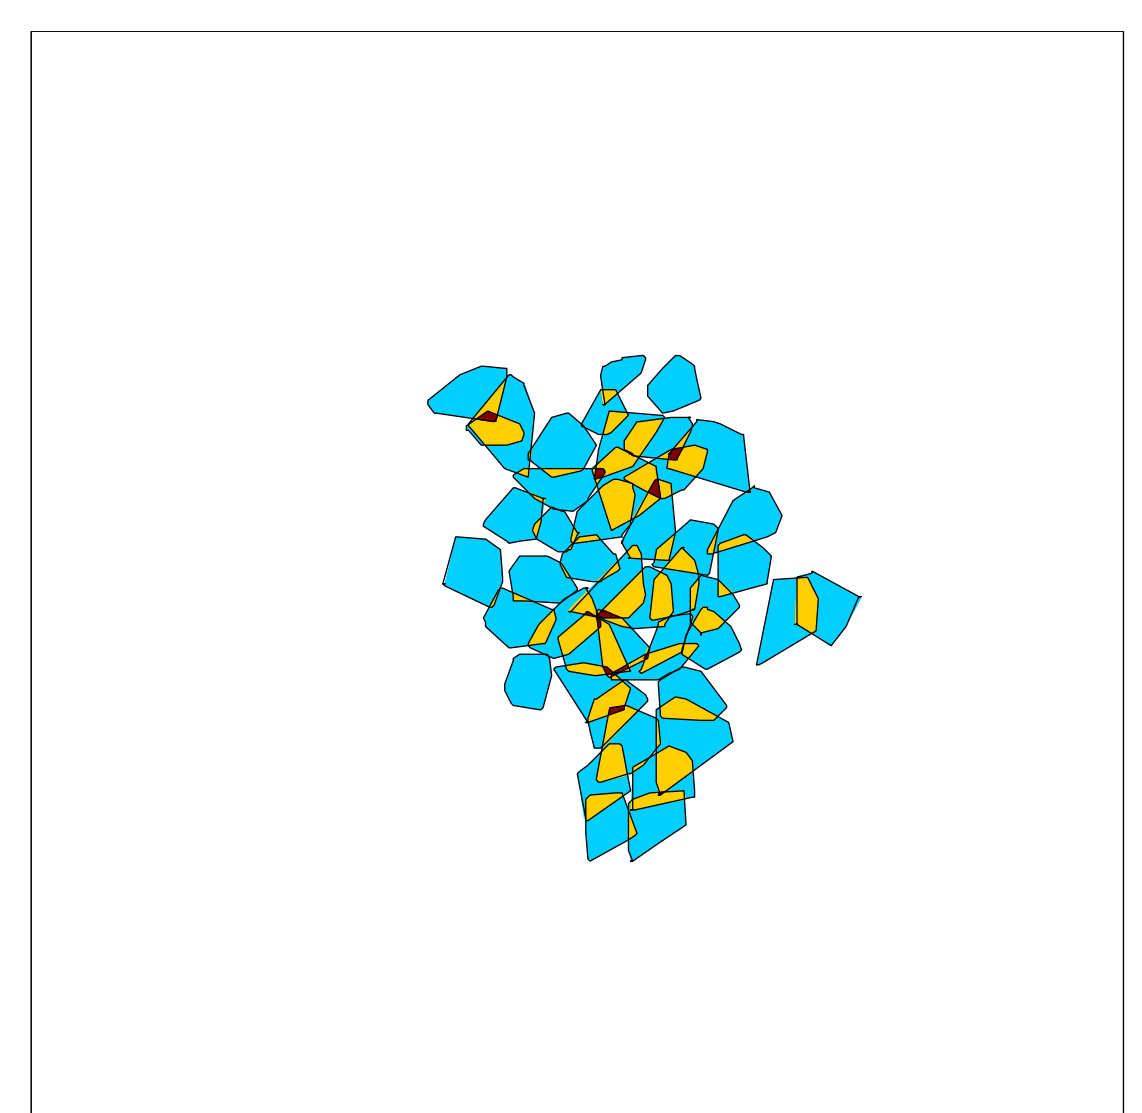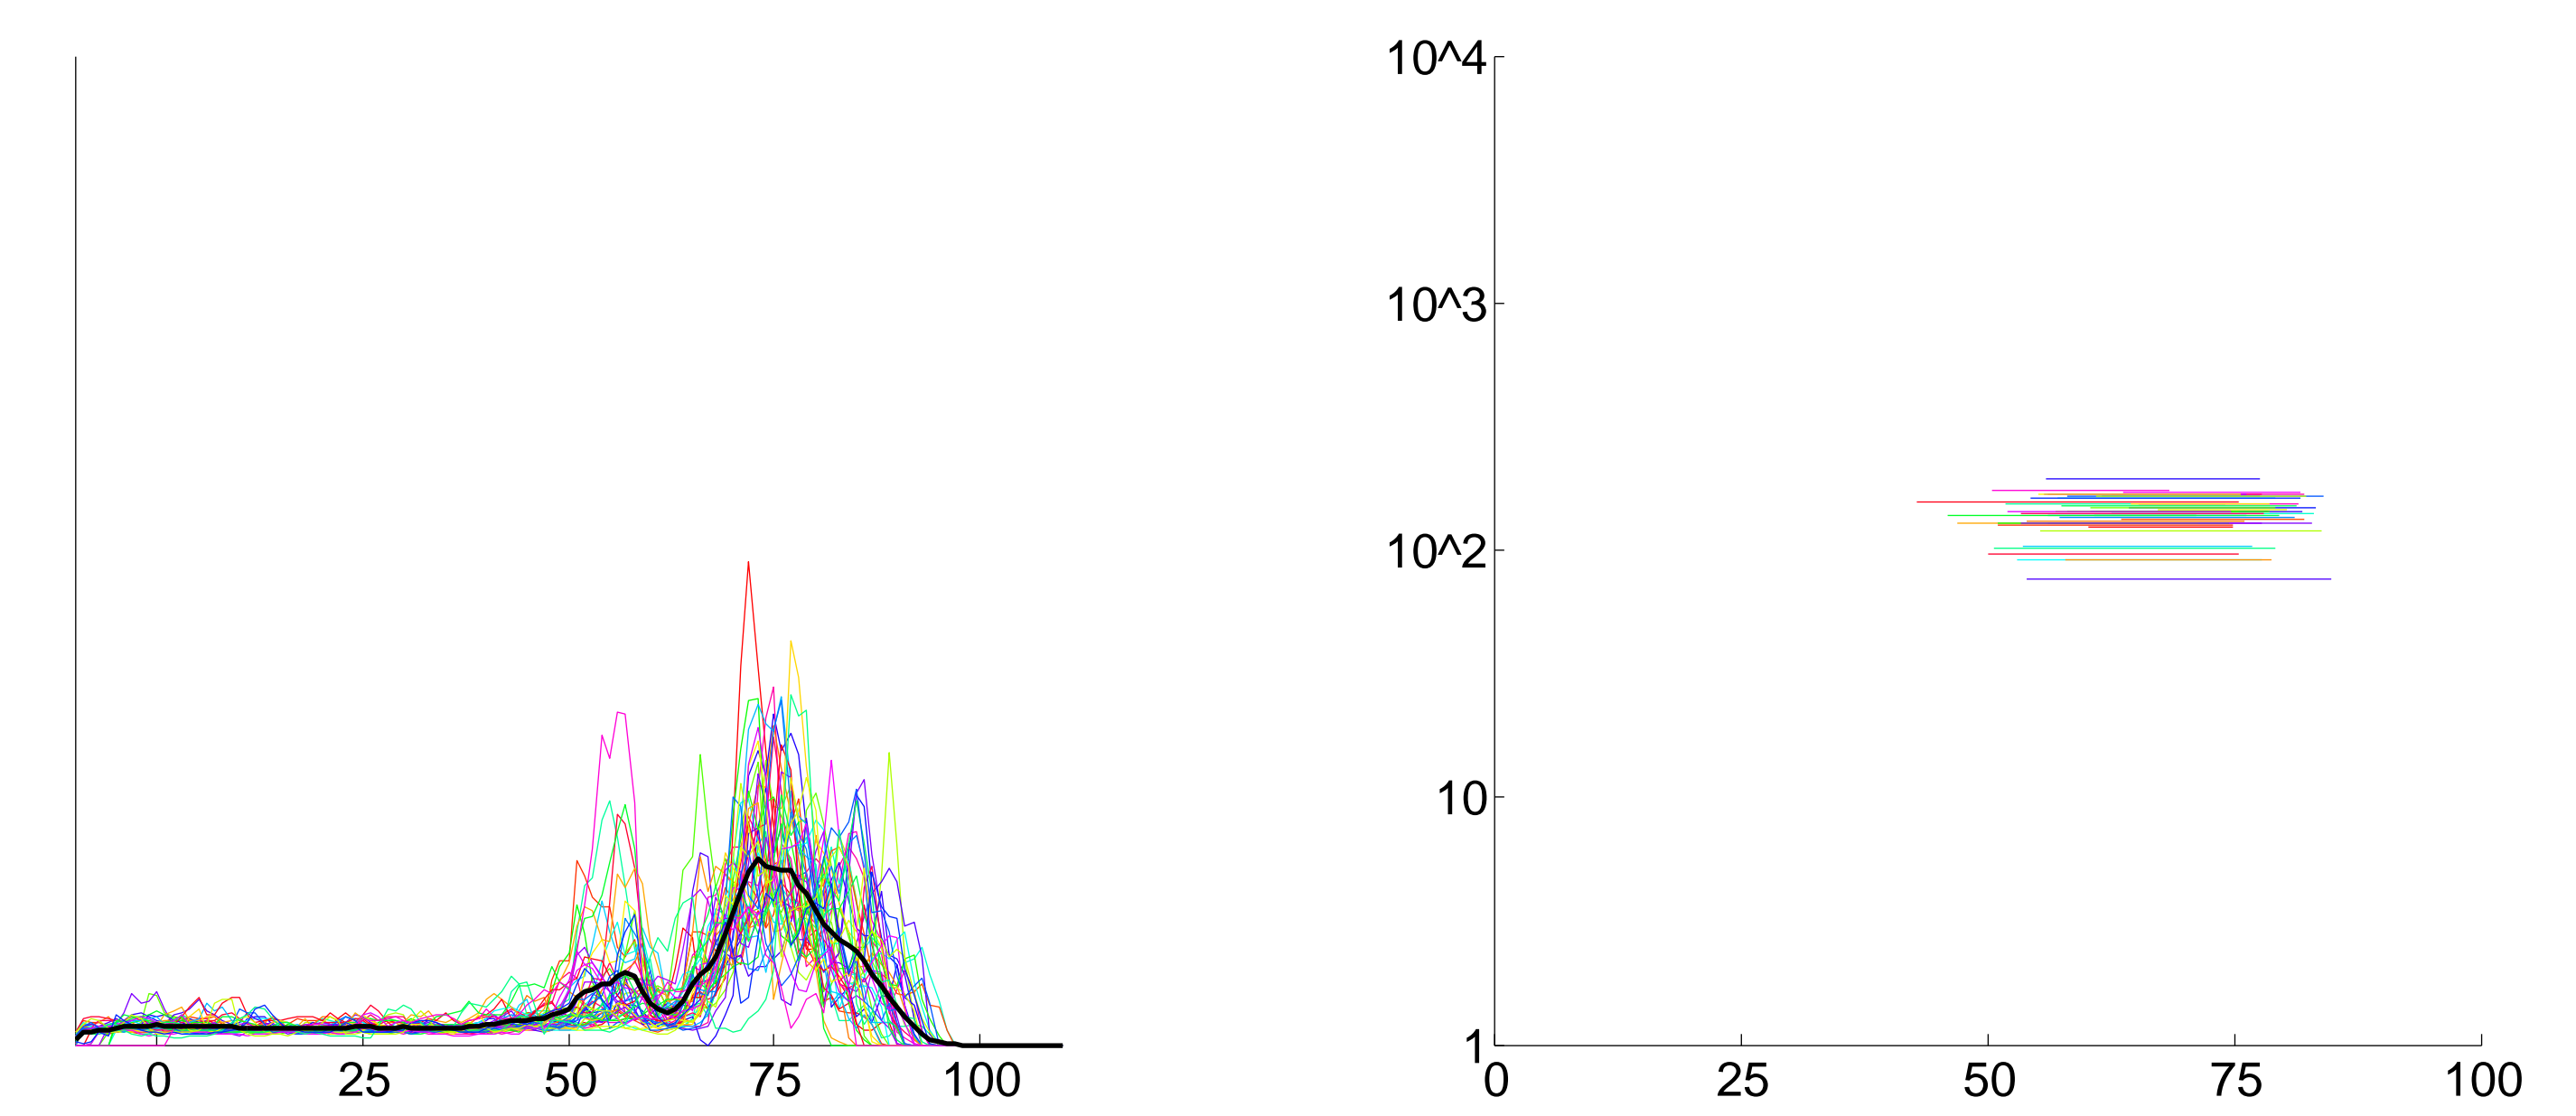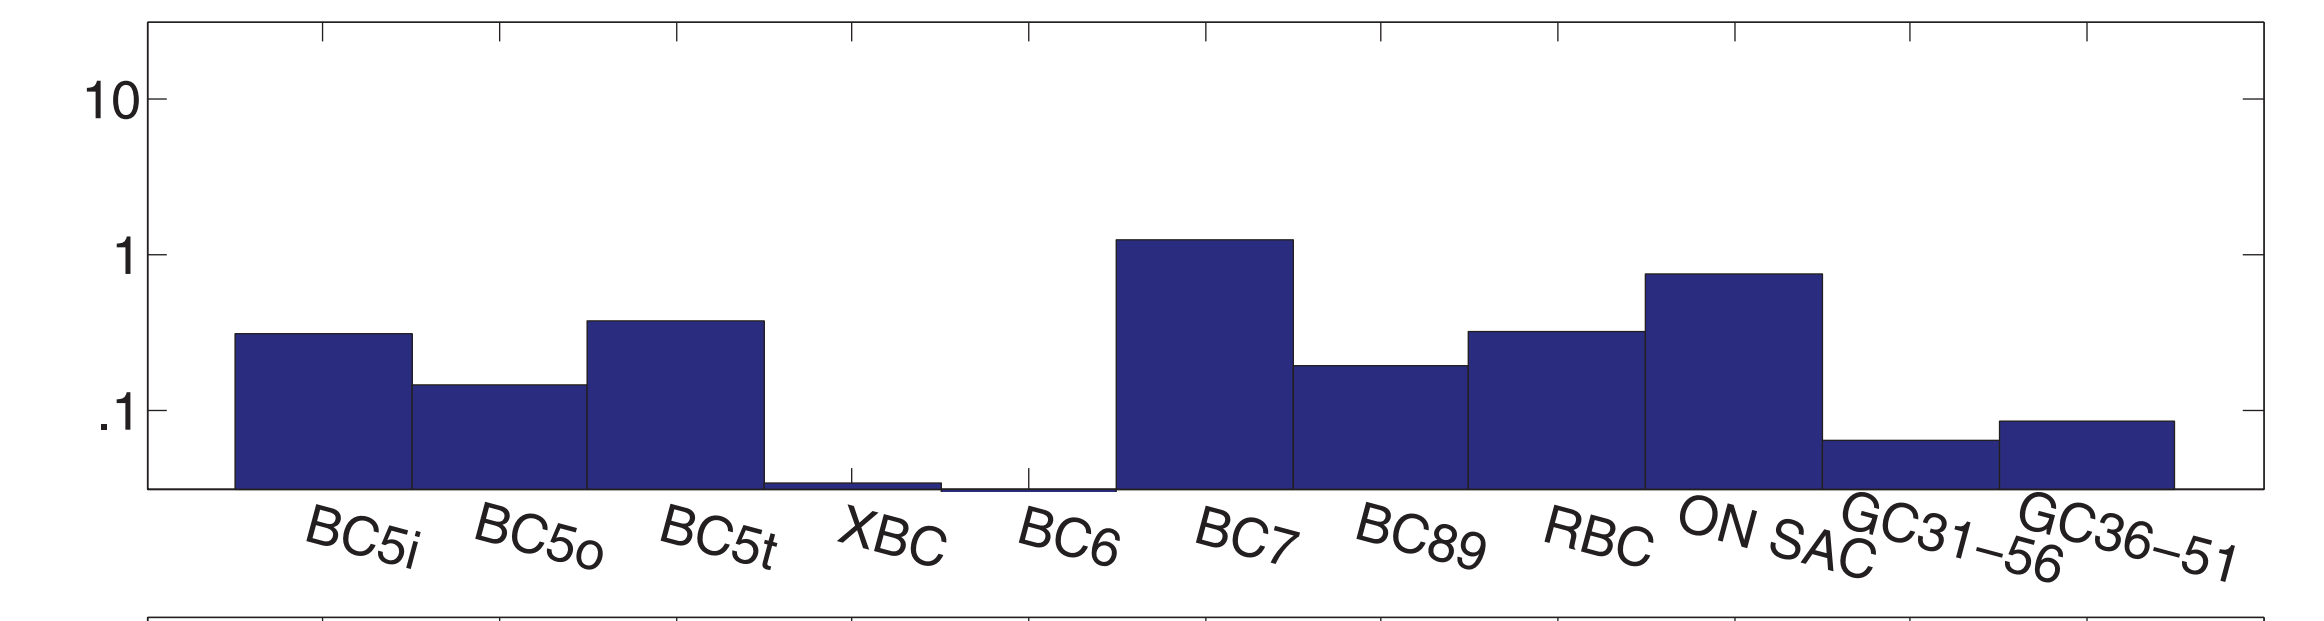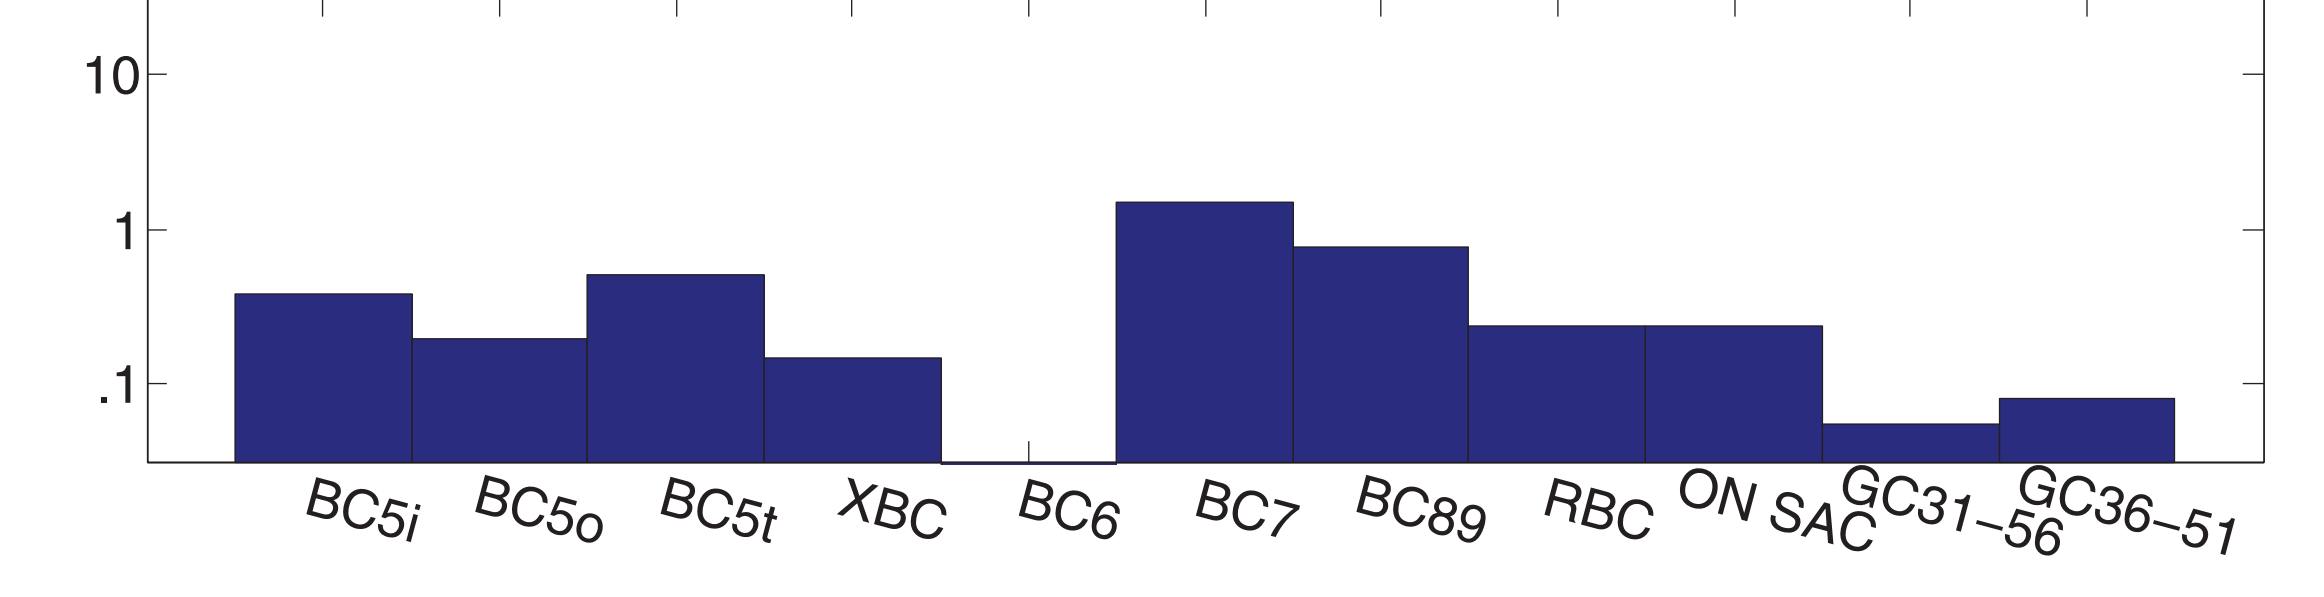

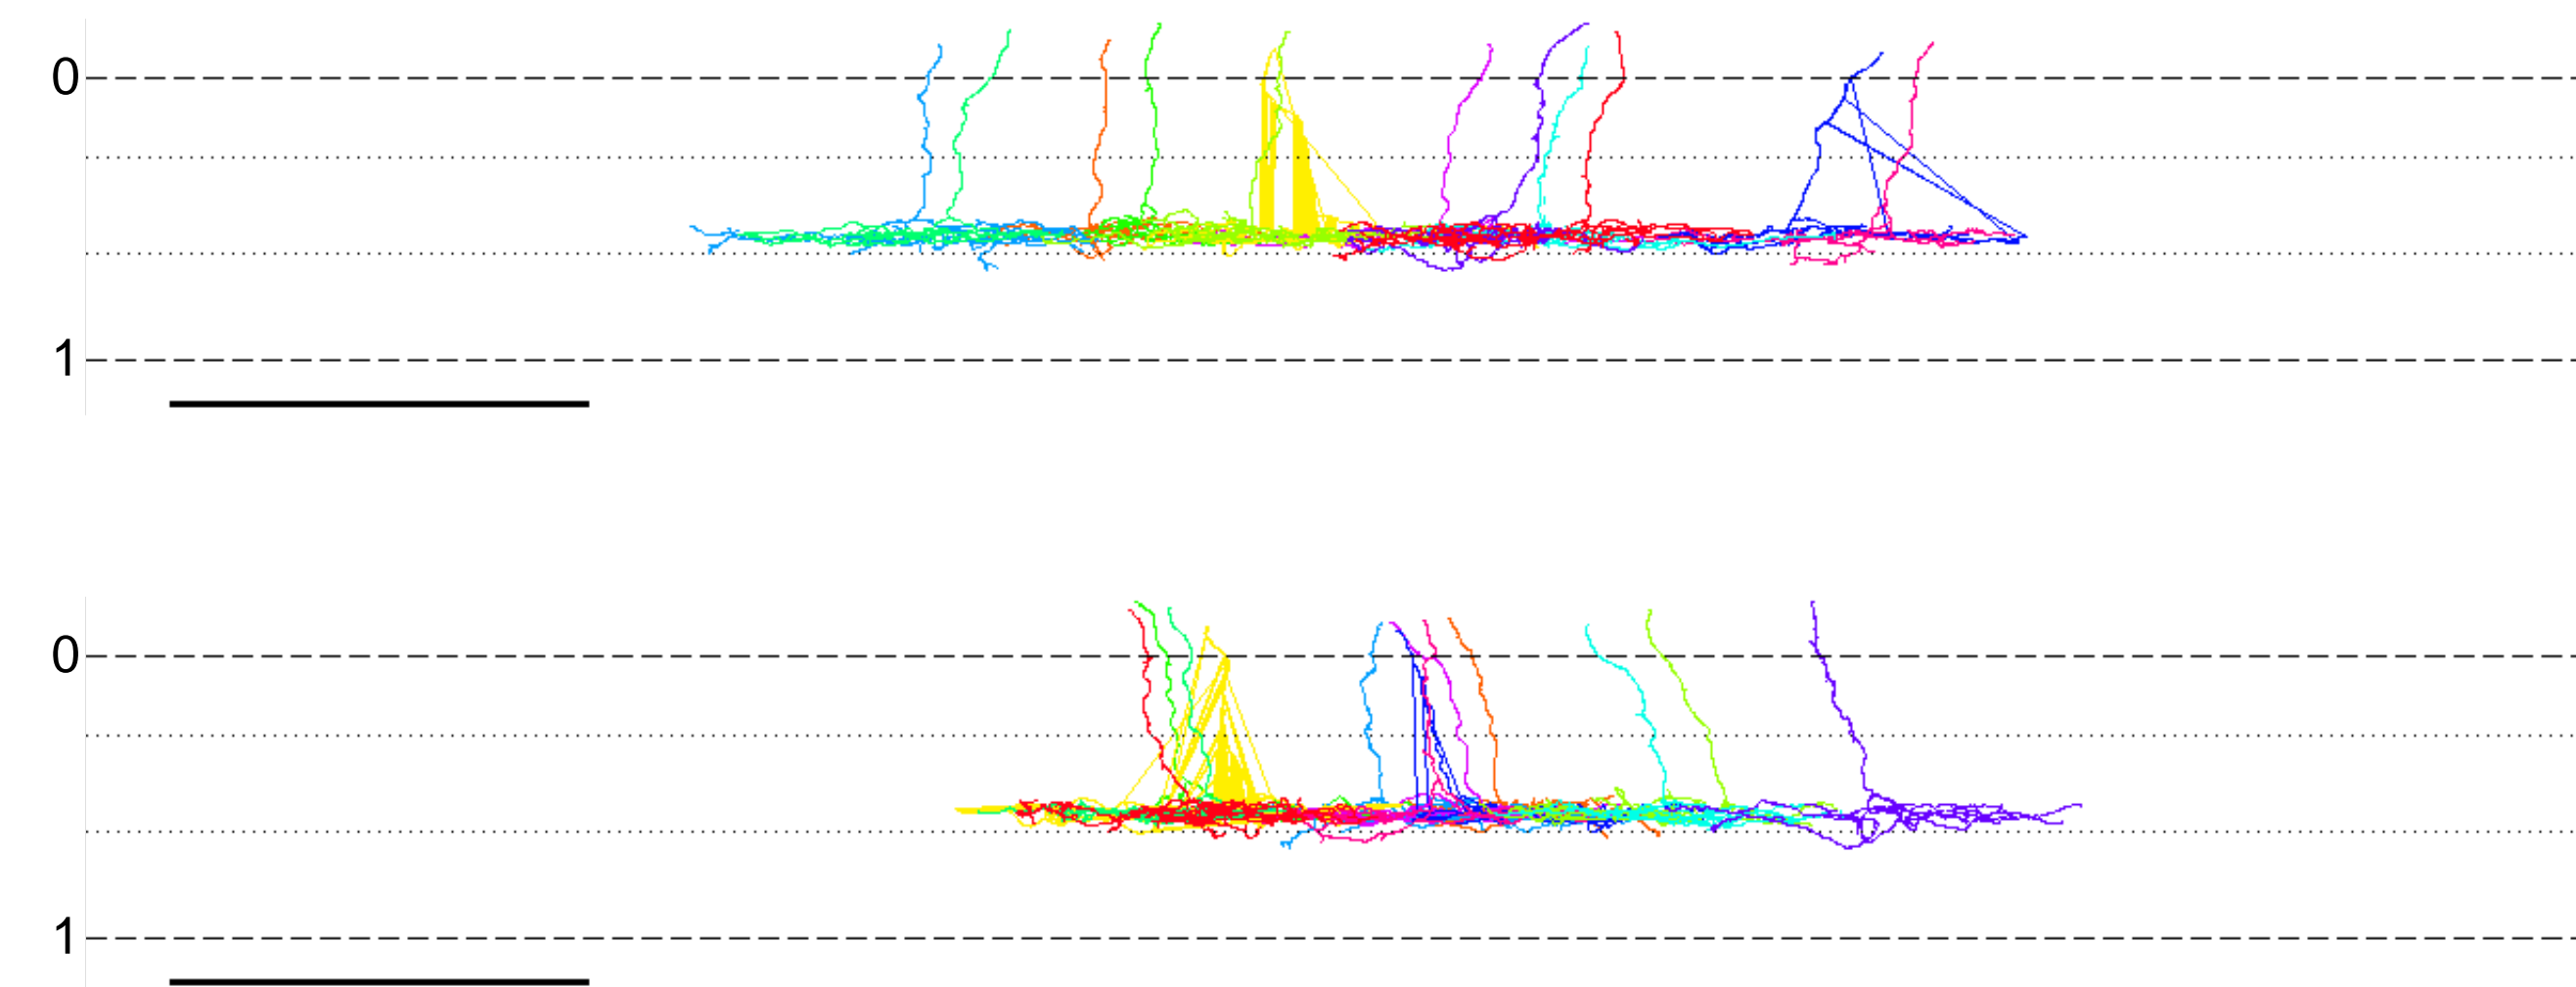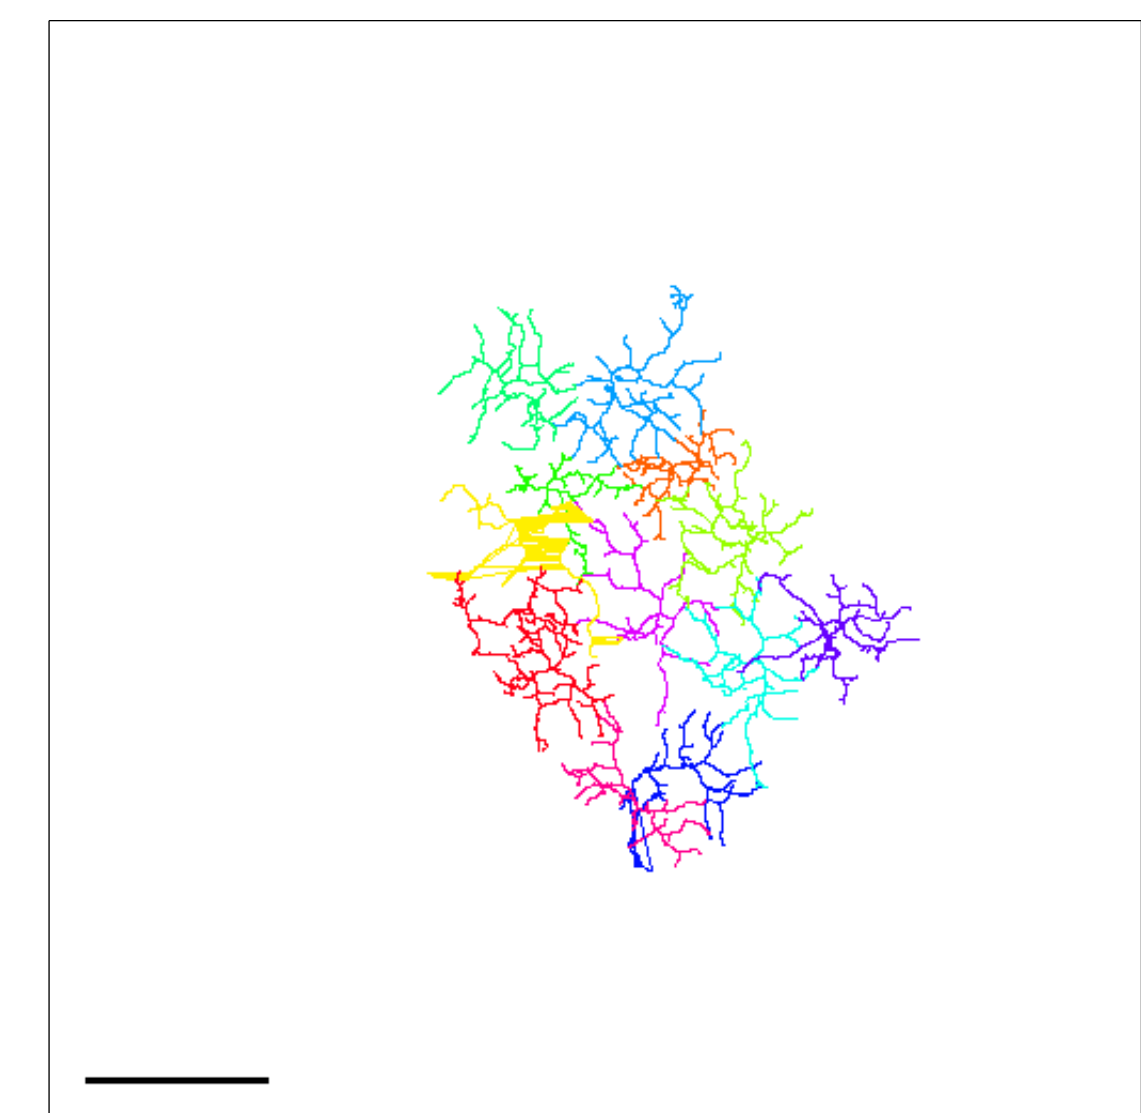

XBC

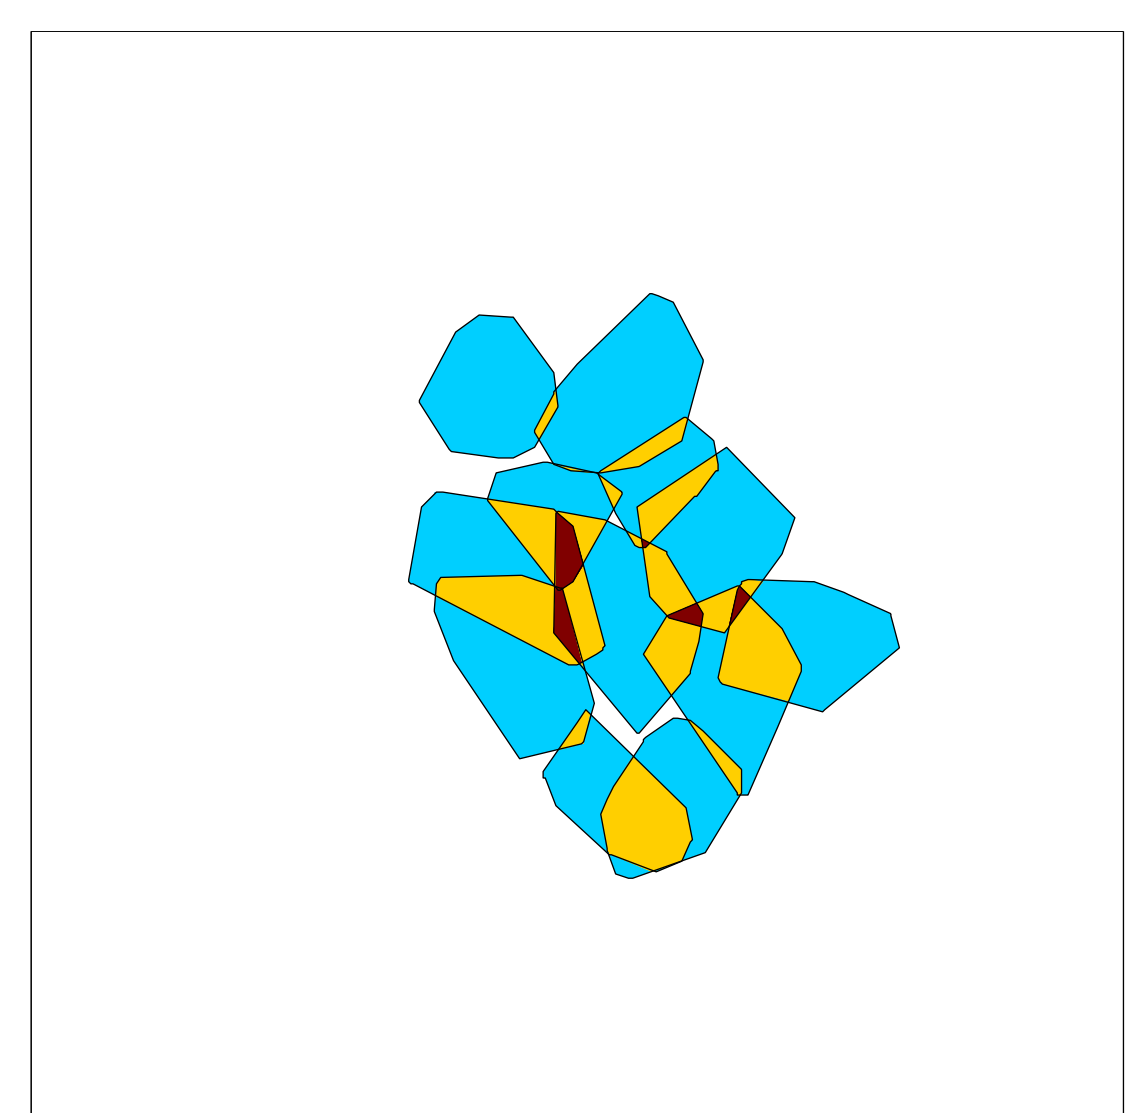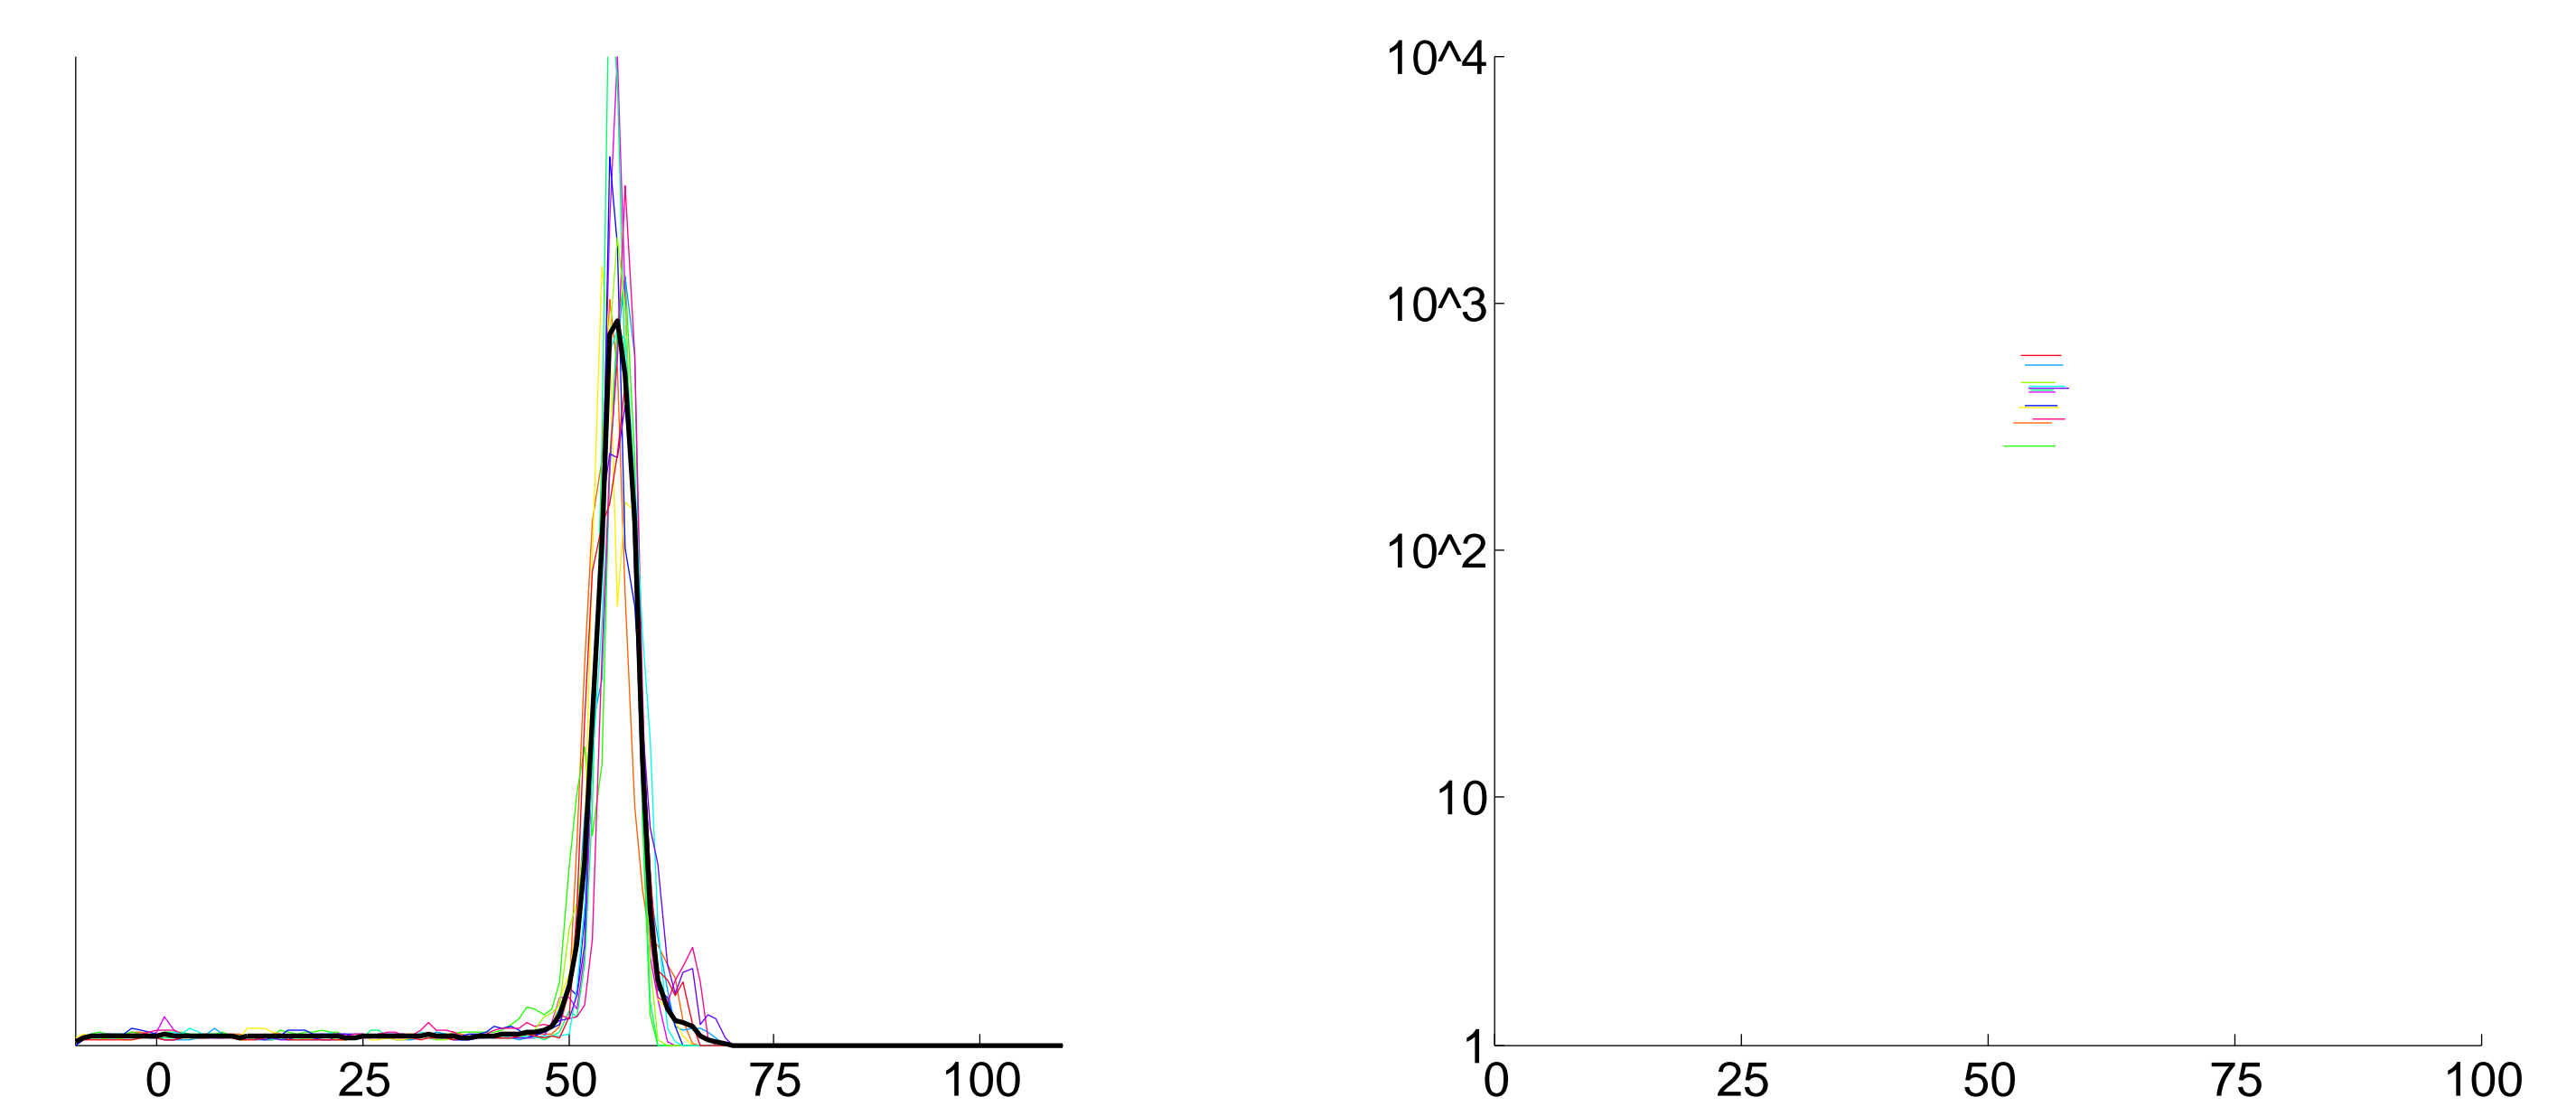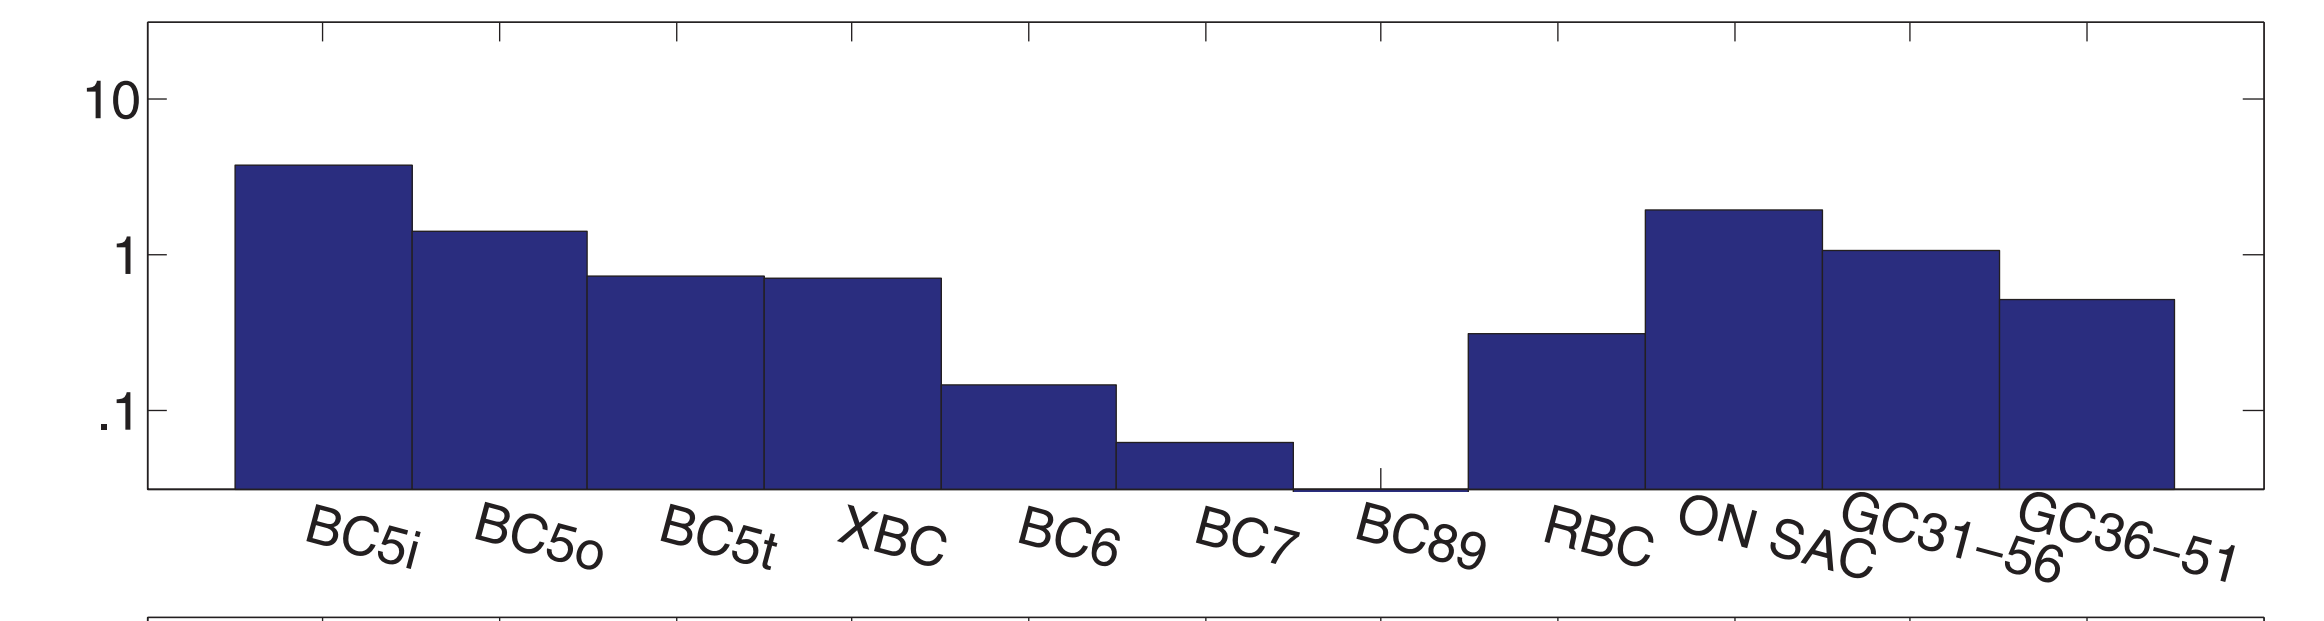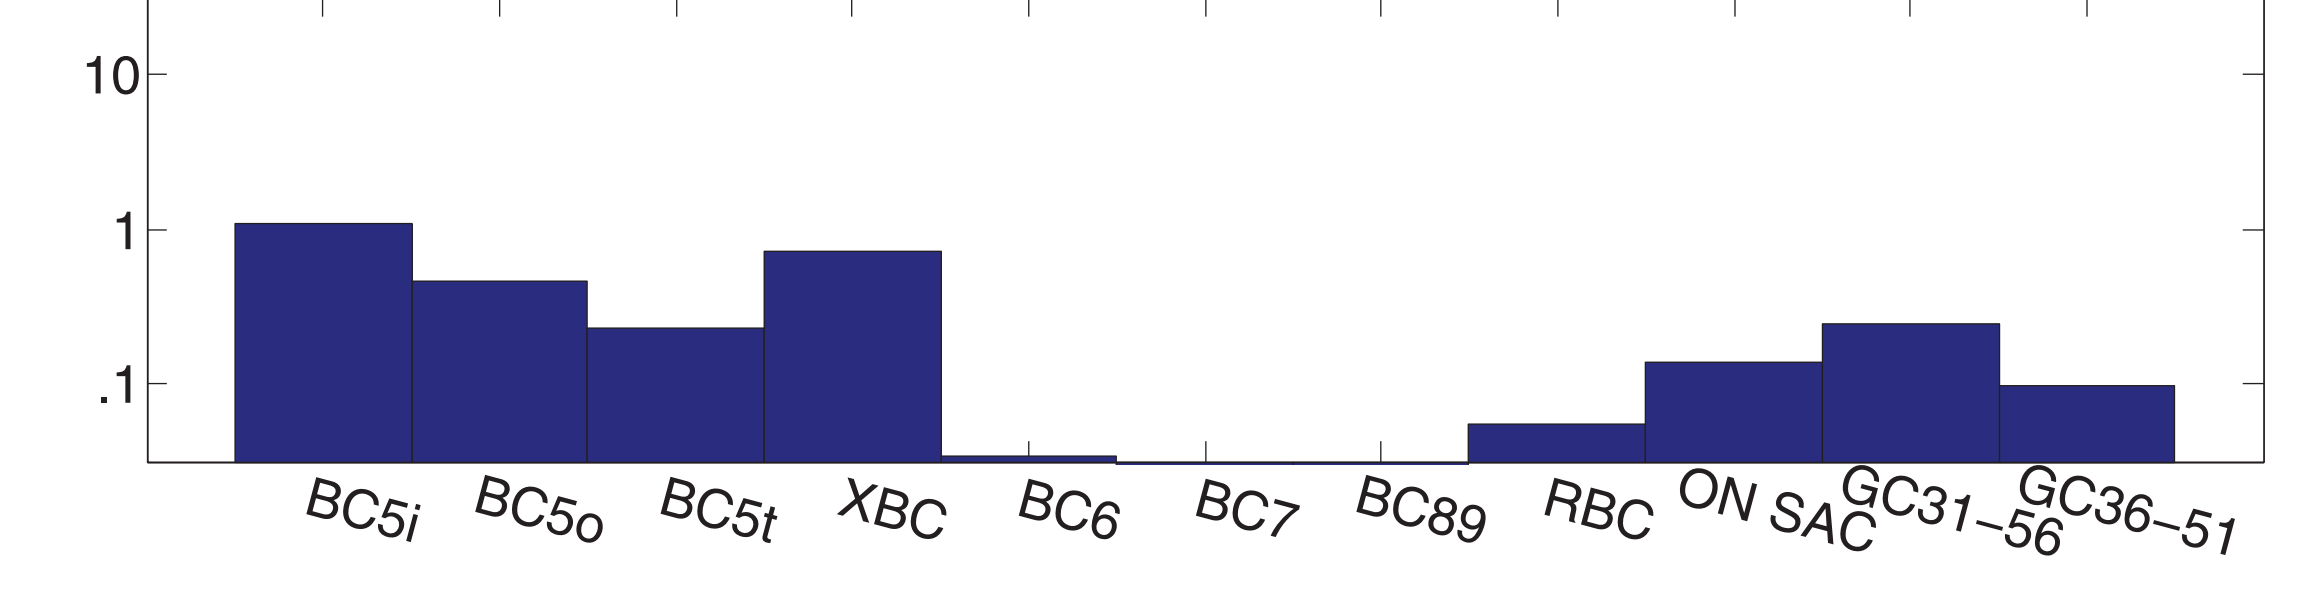

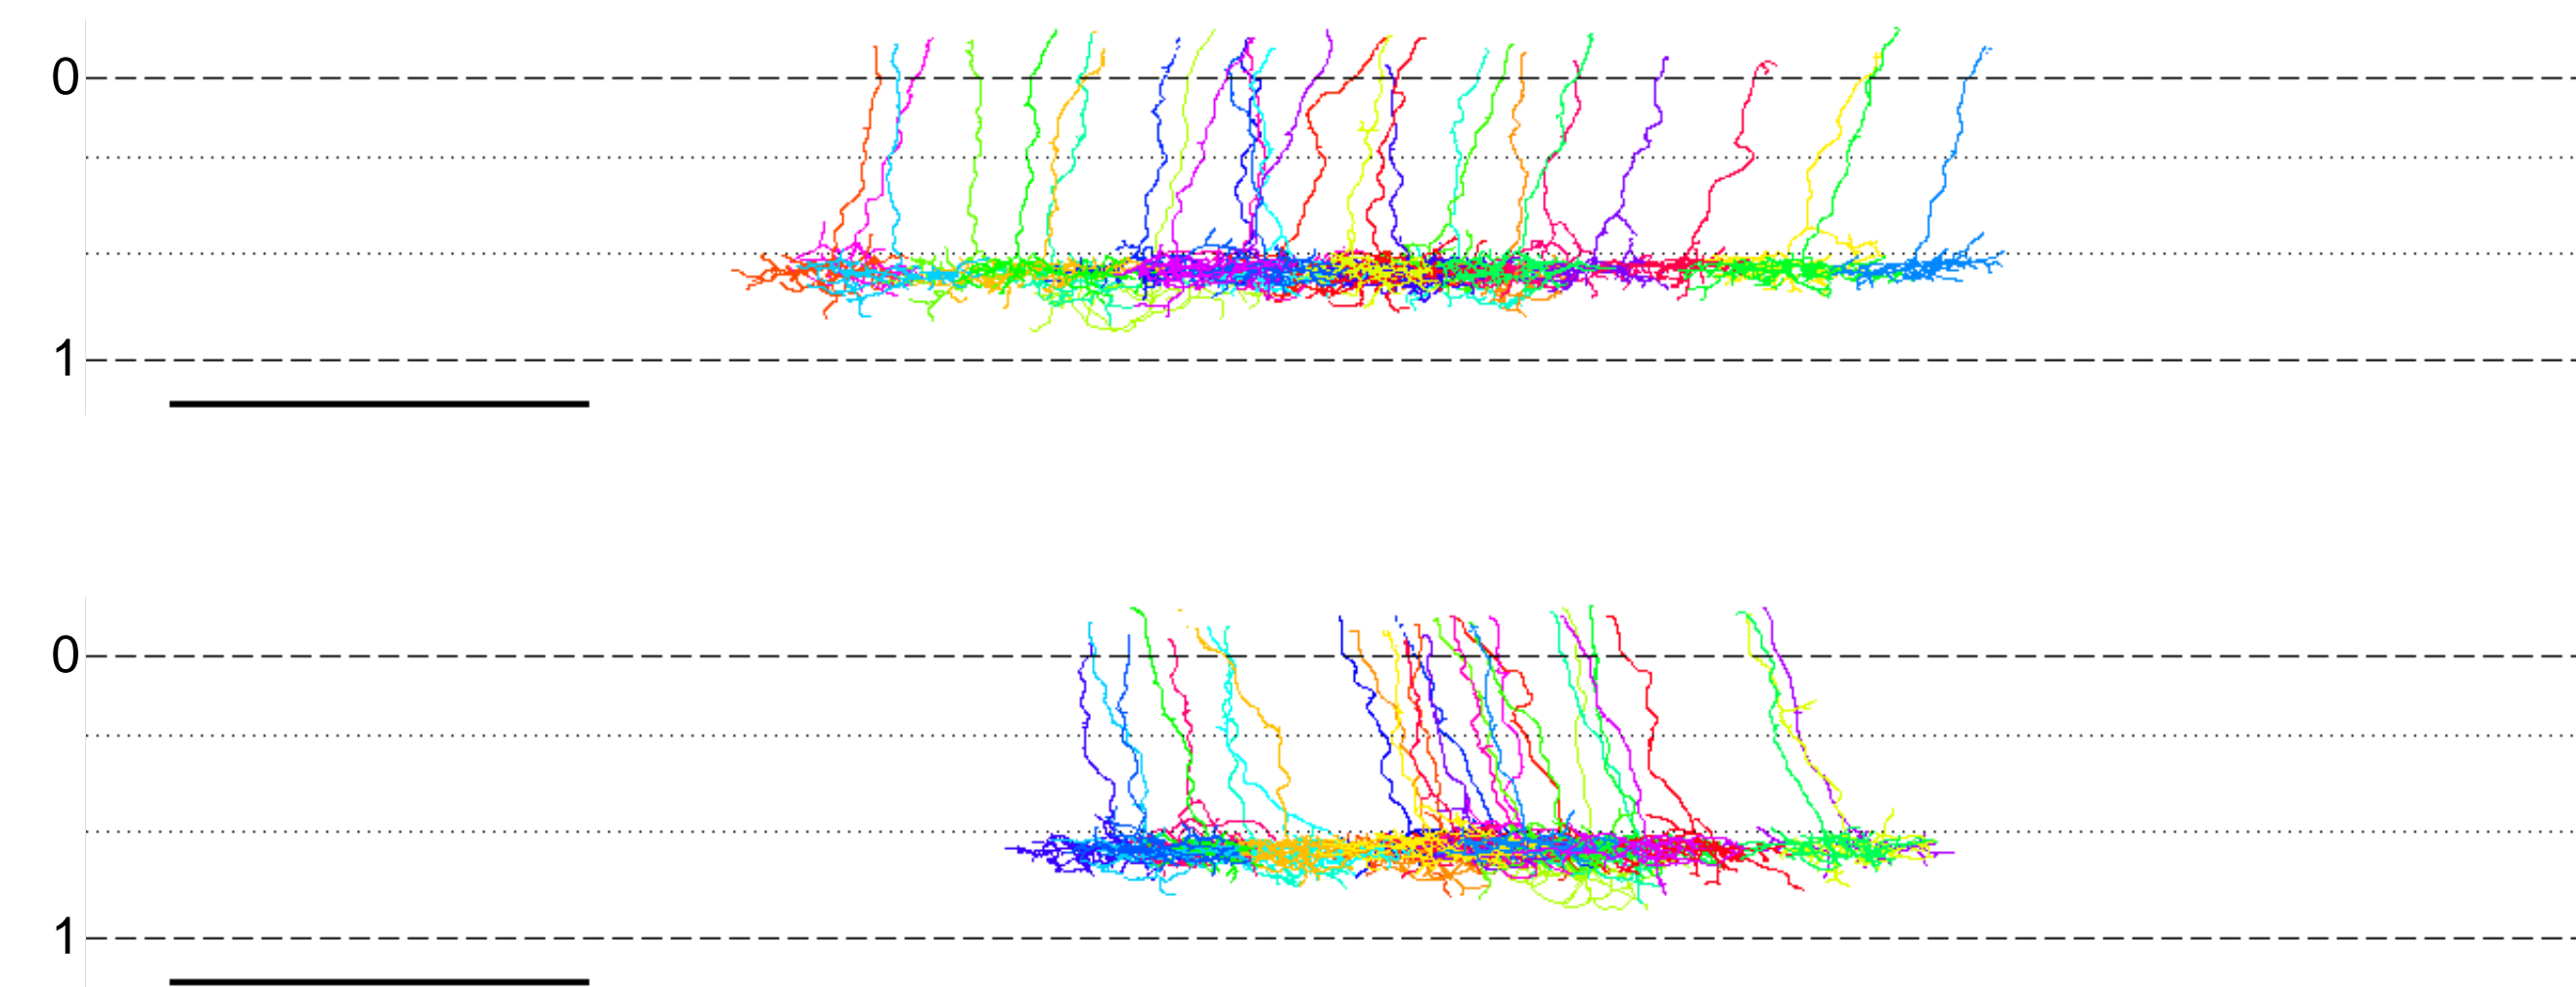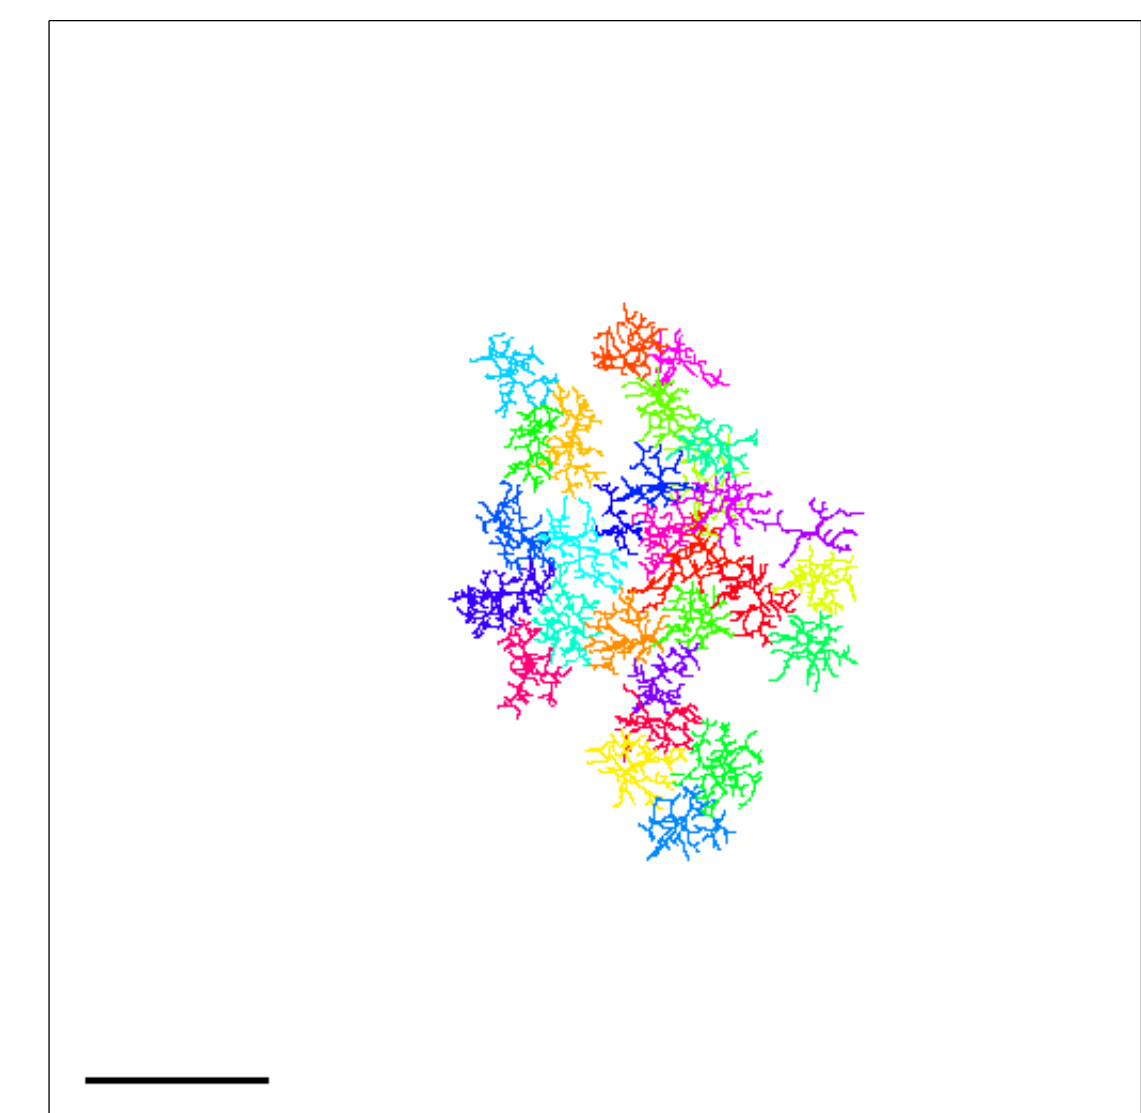

BC7

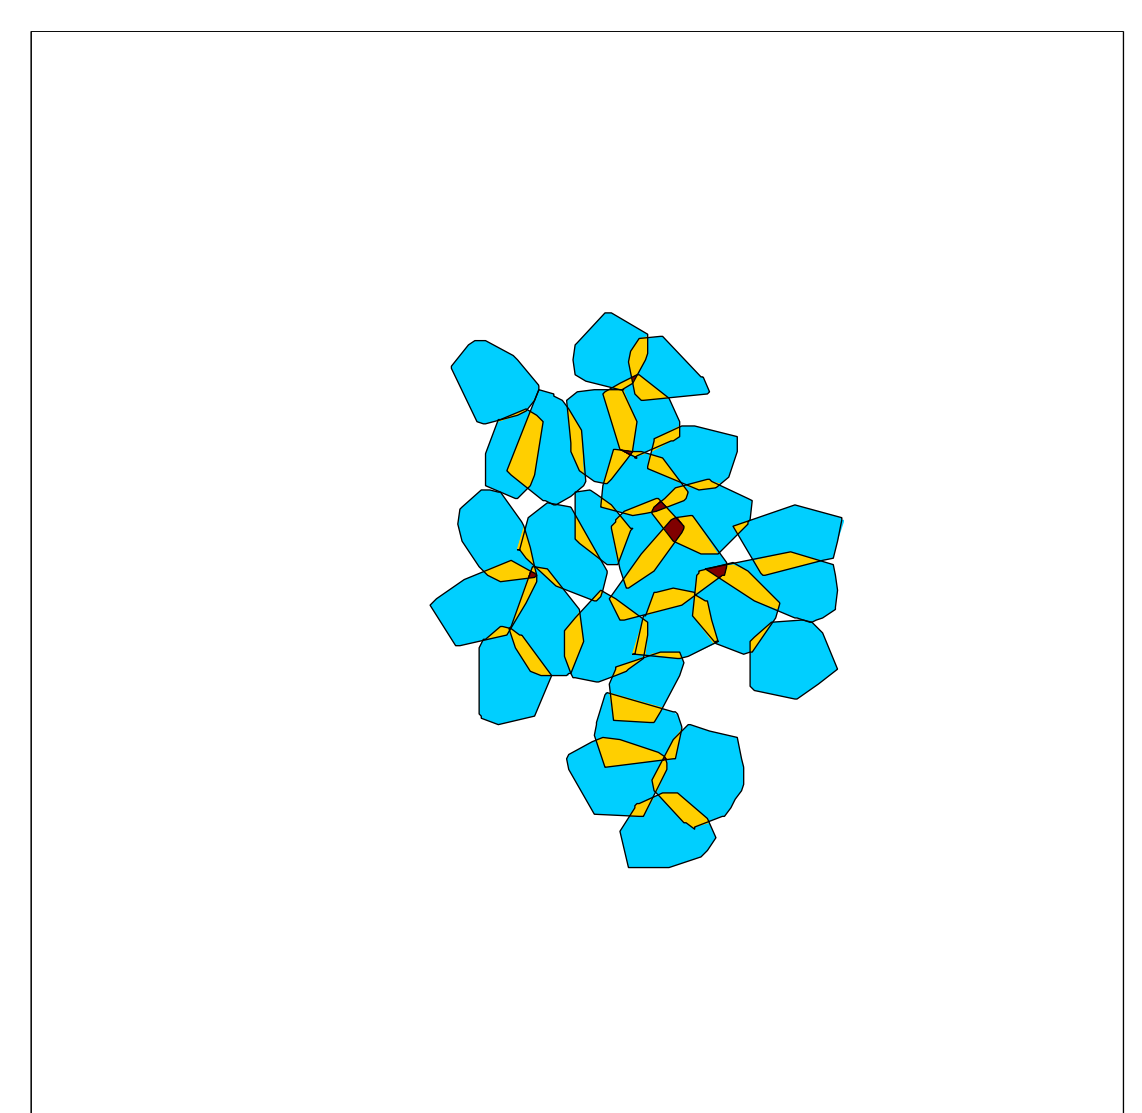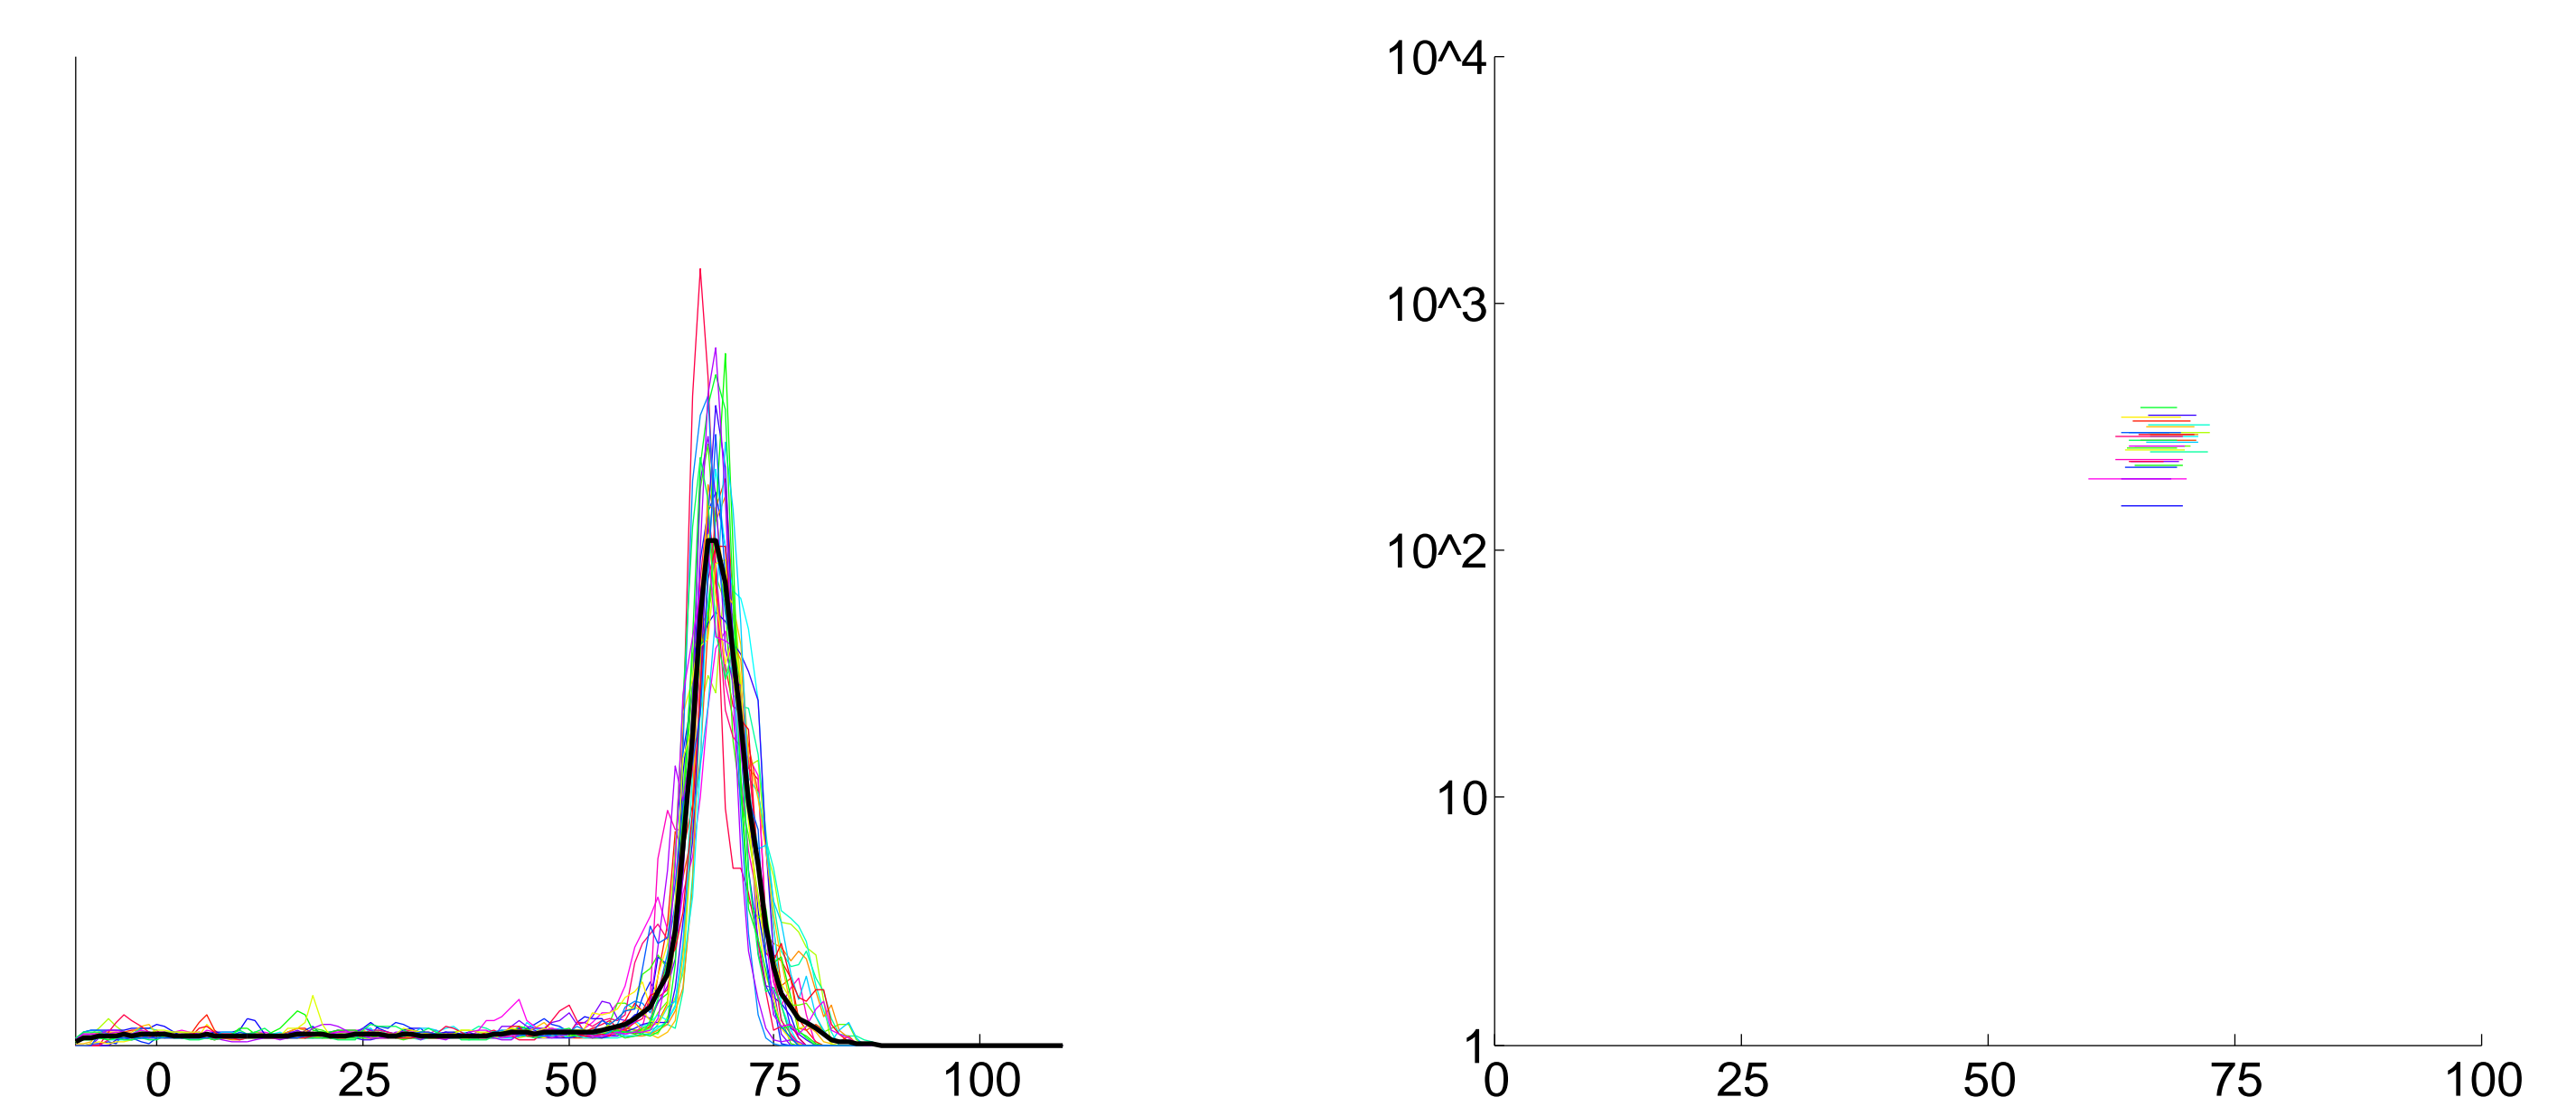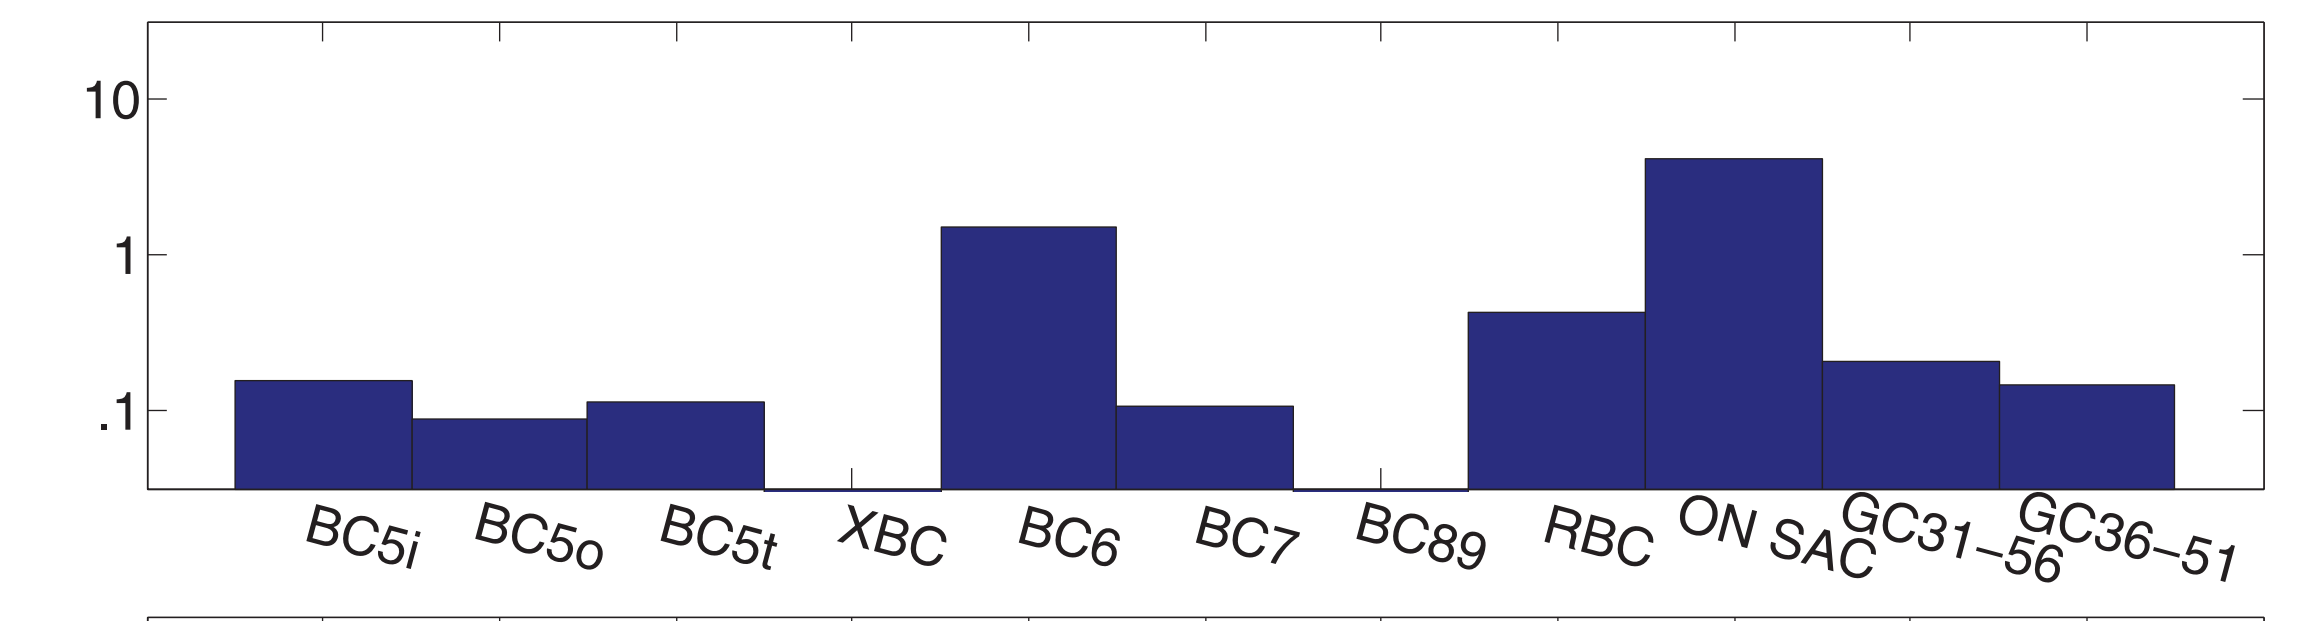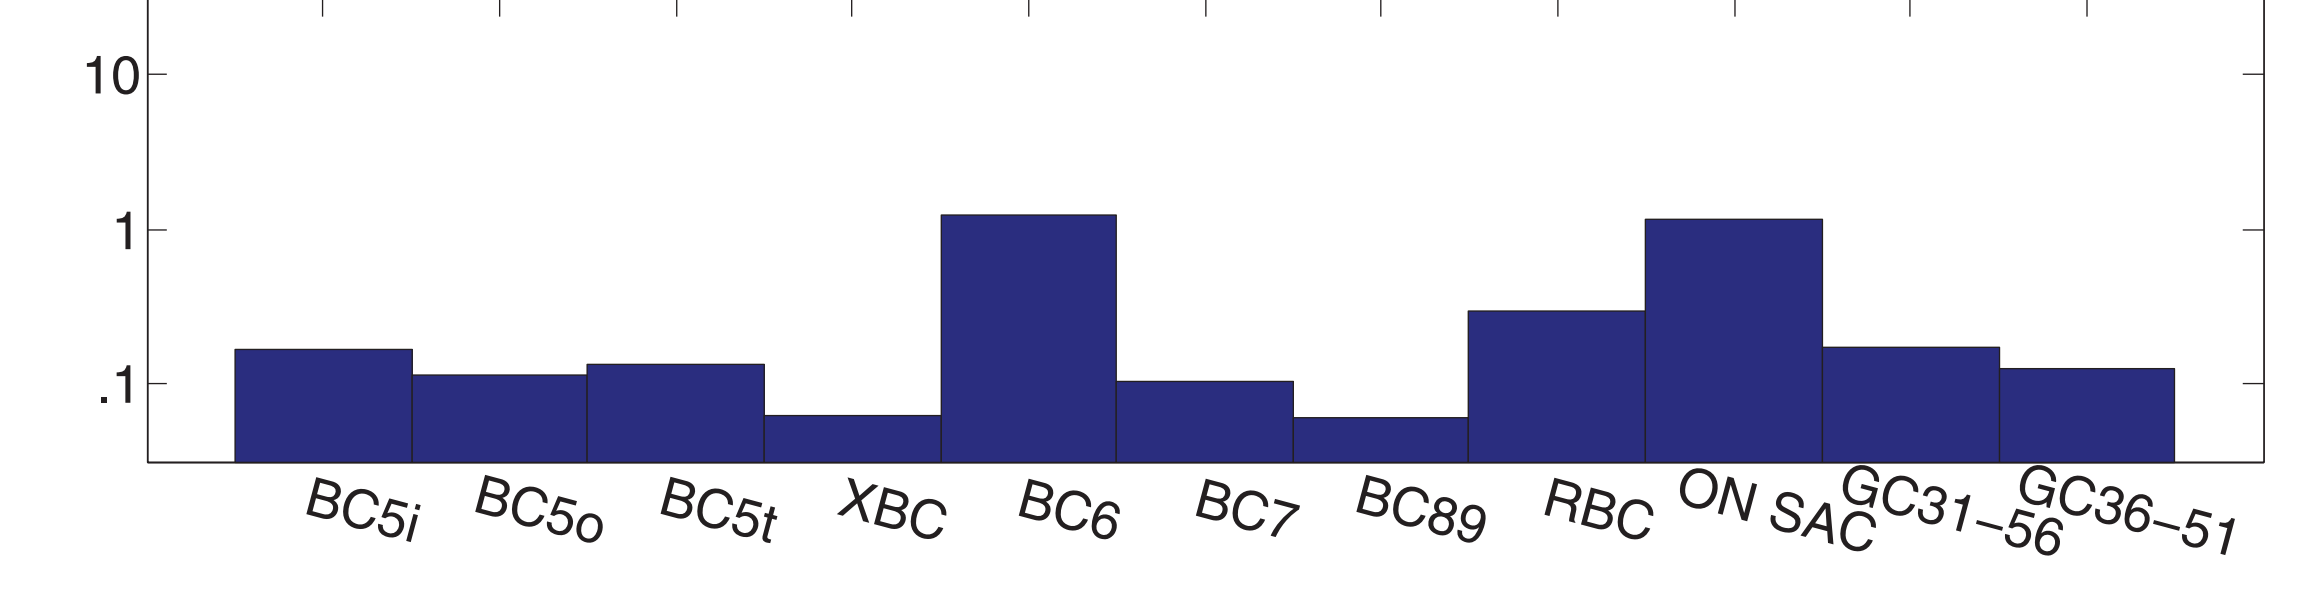

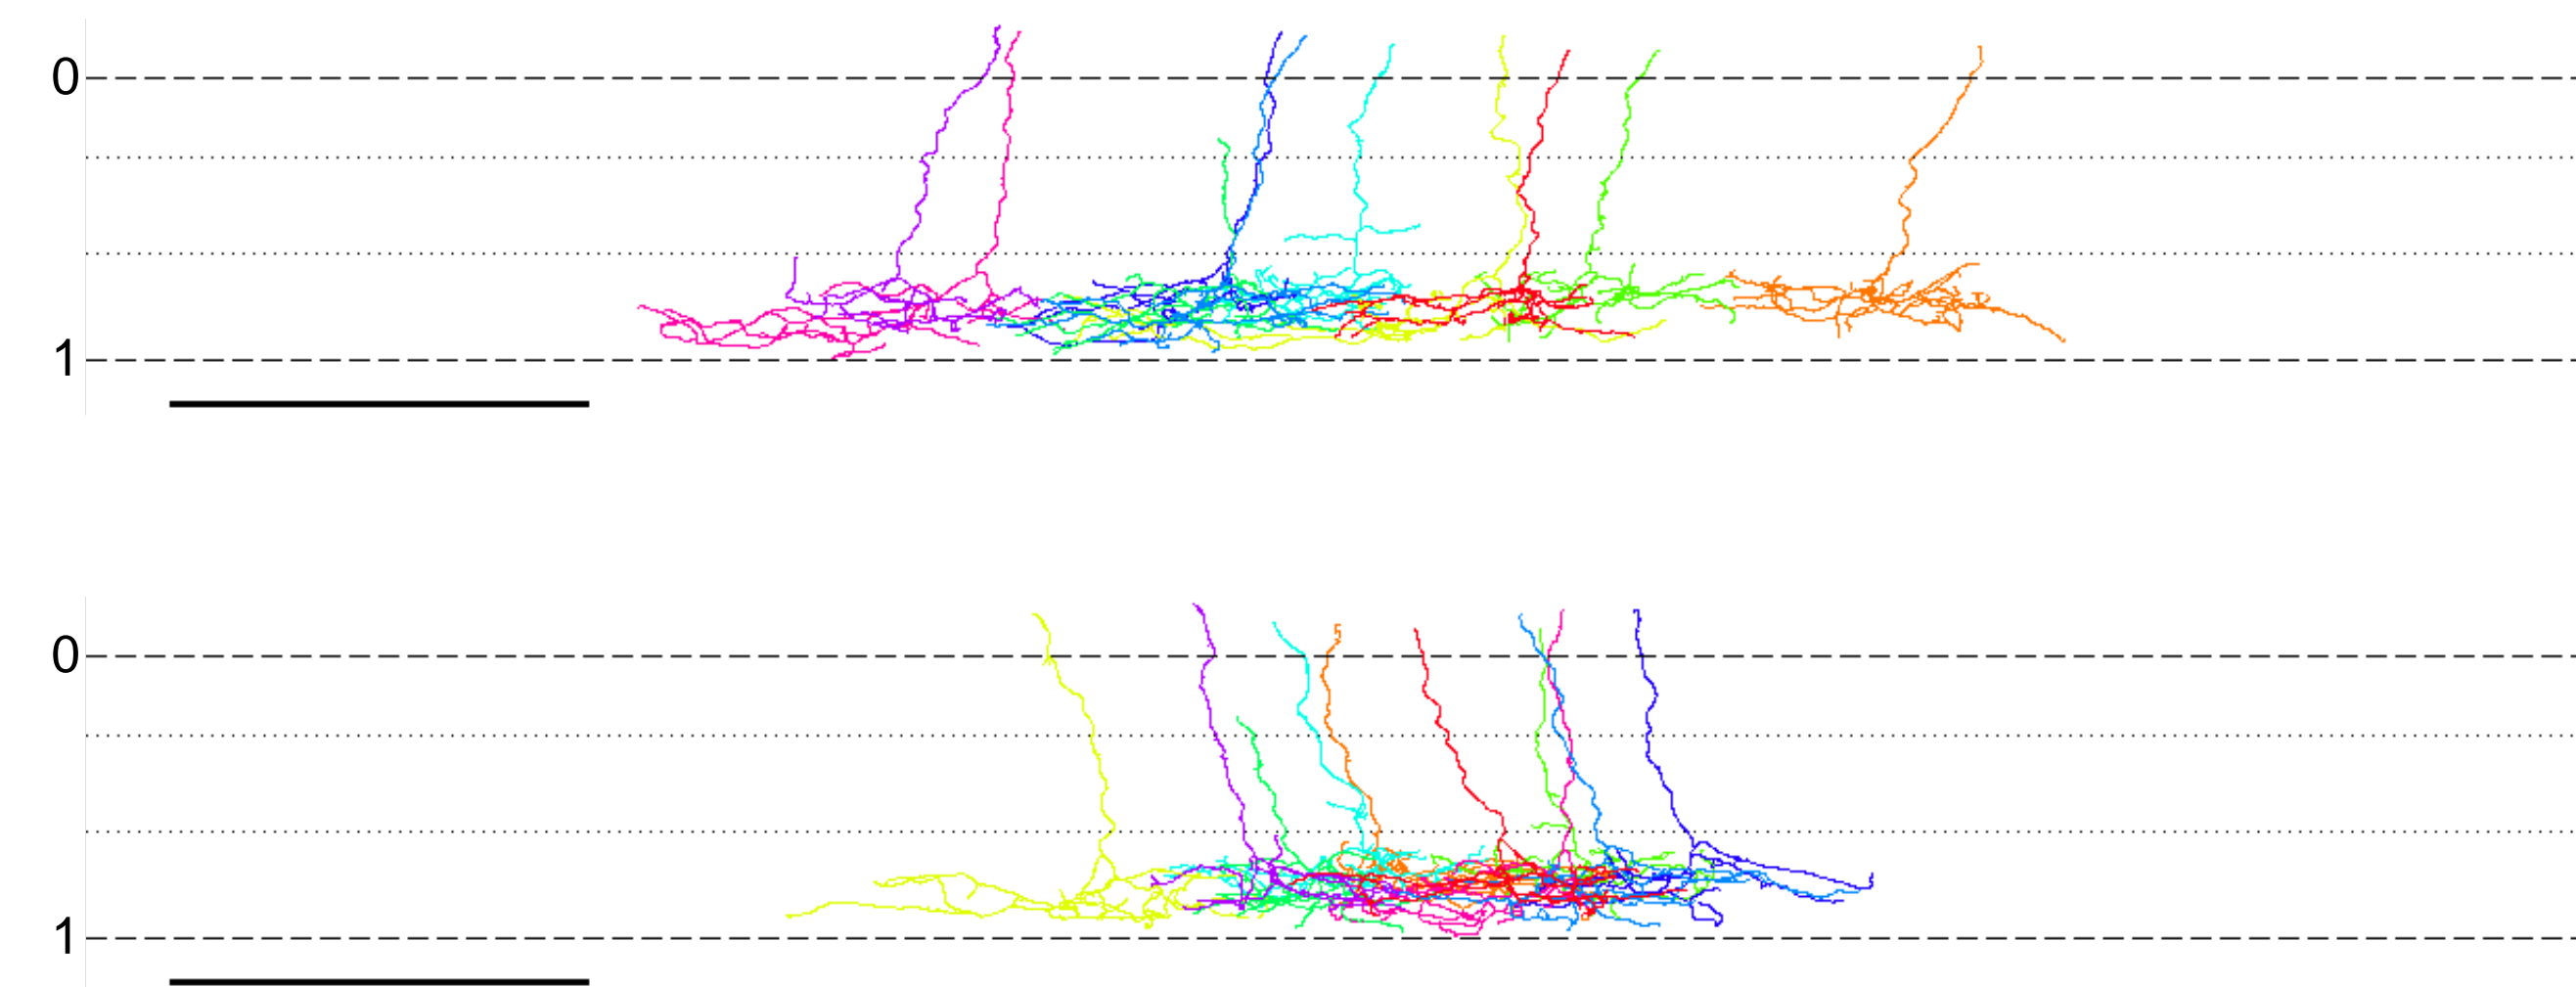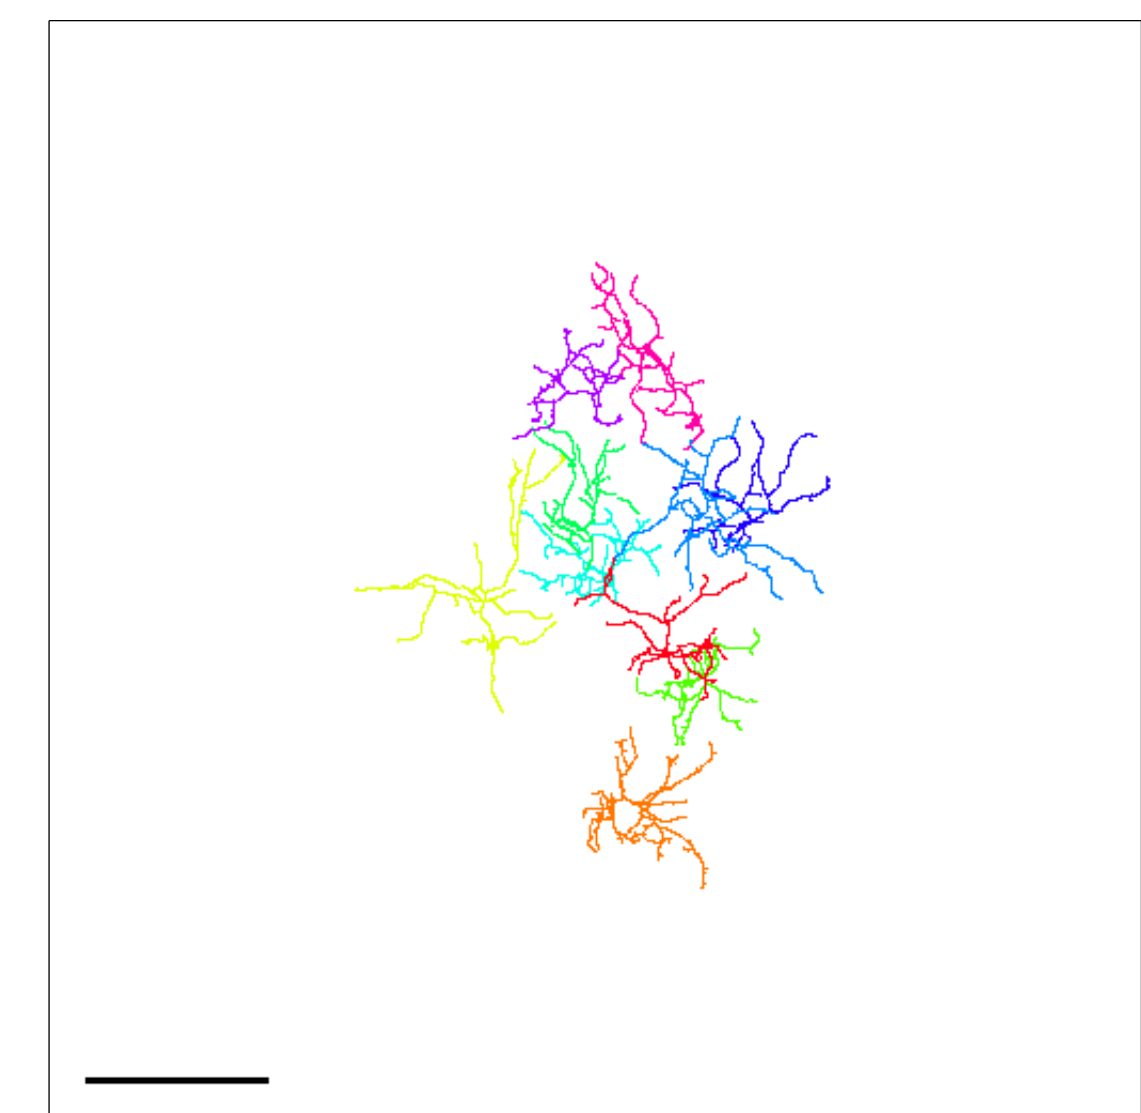

BC89

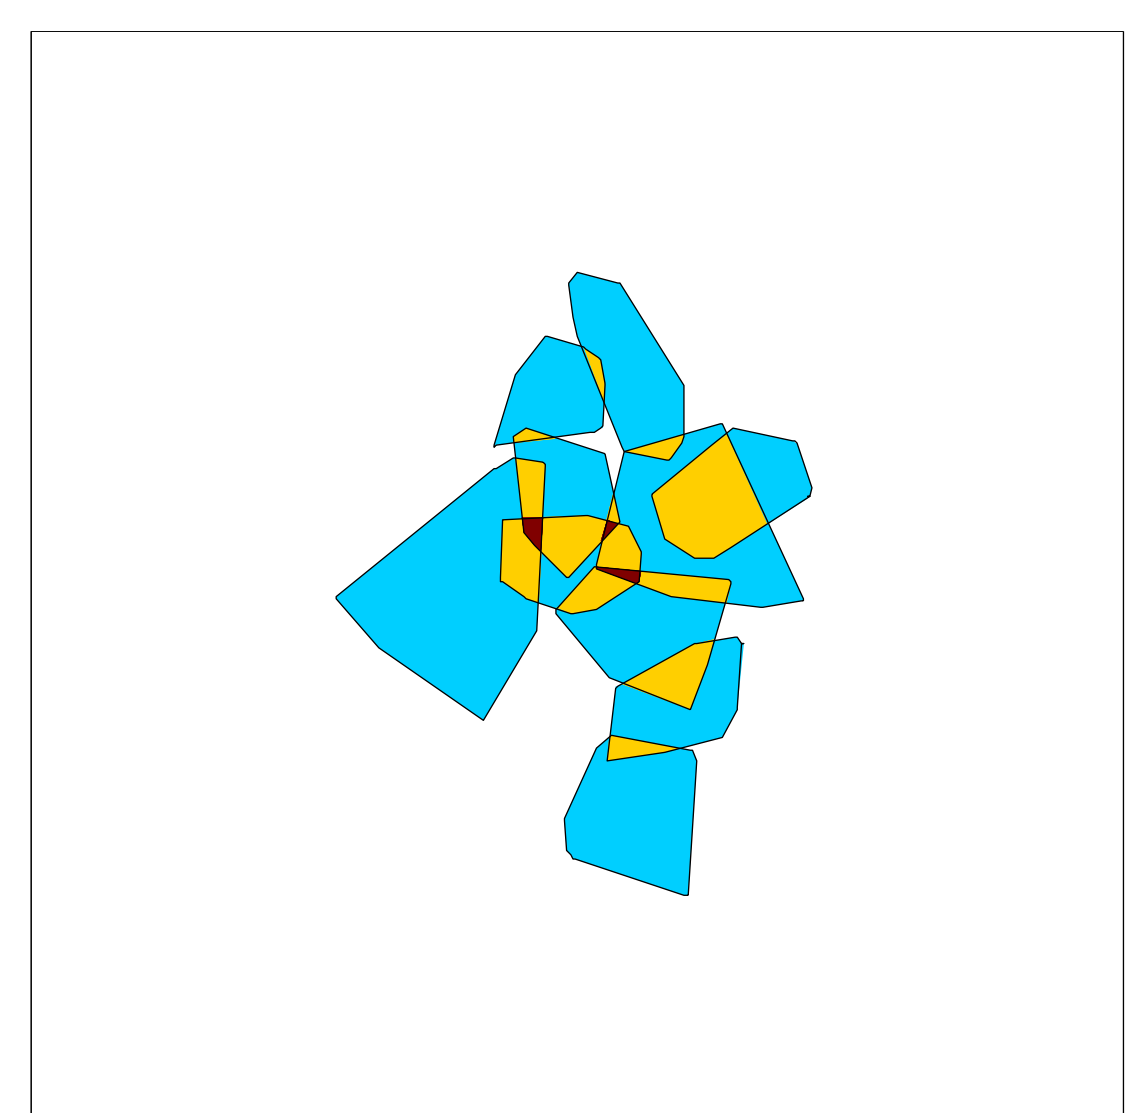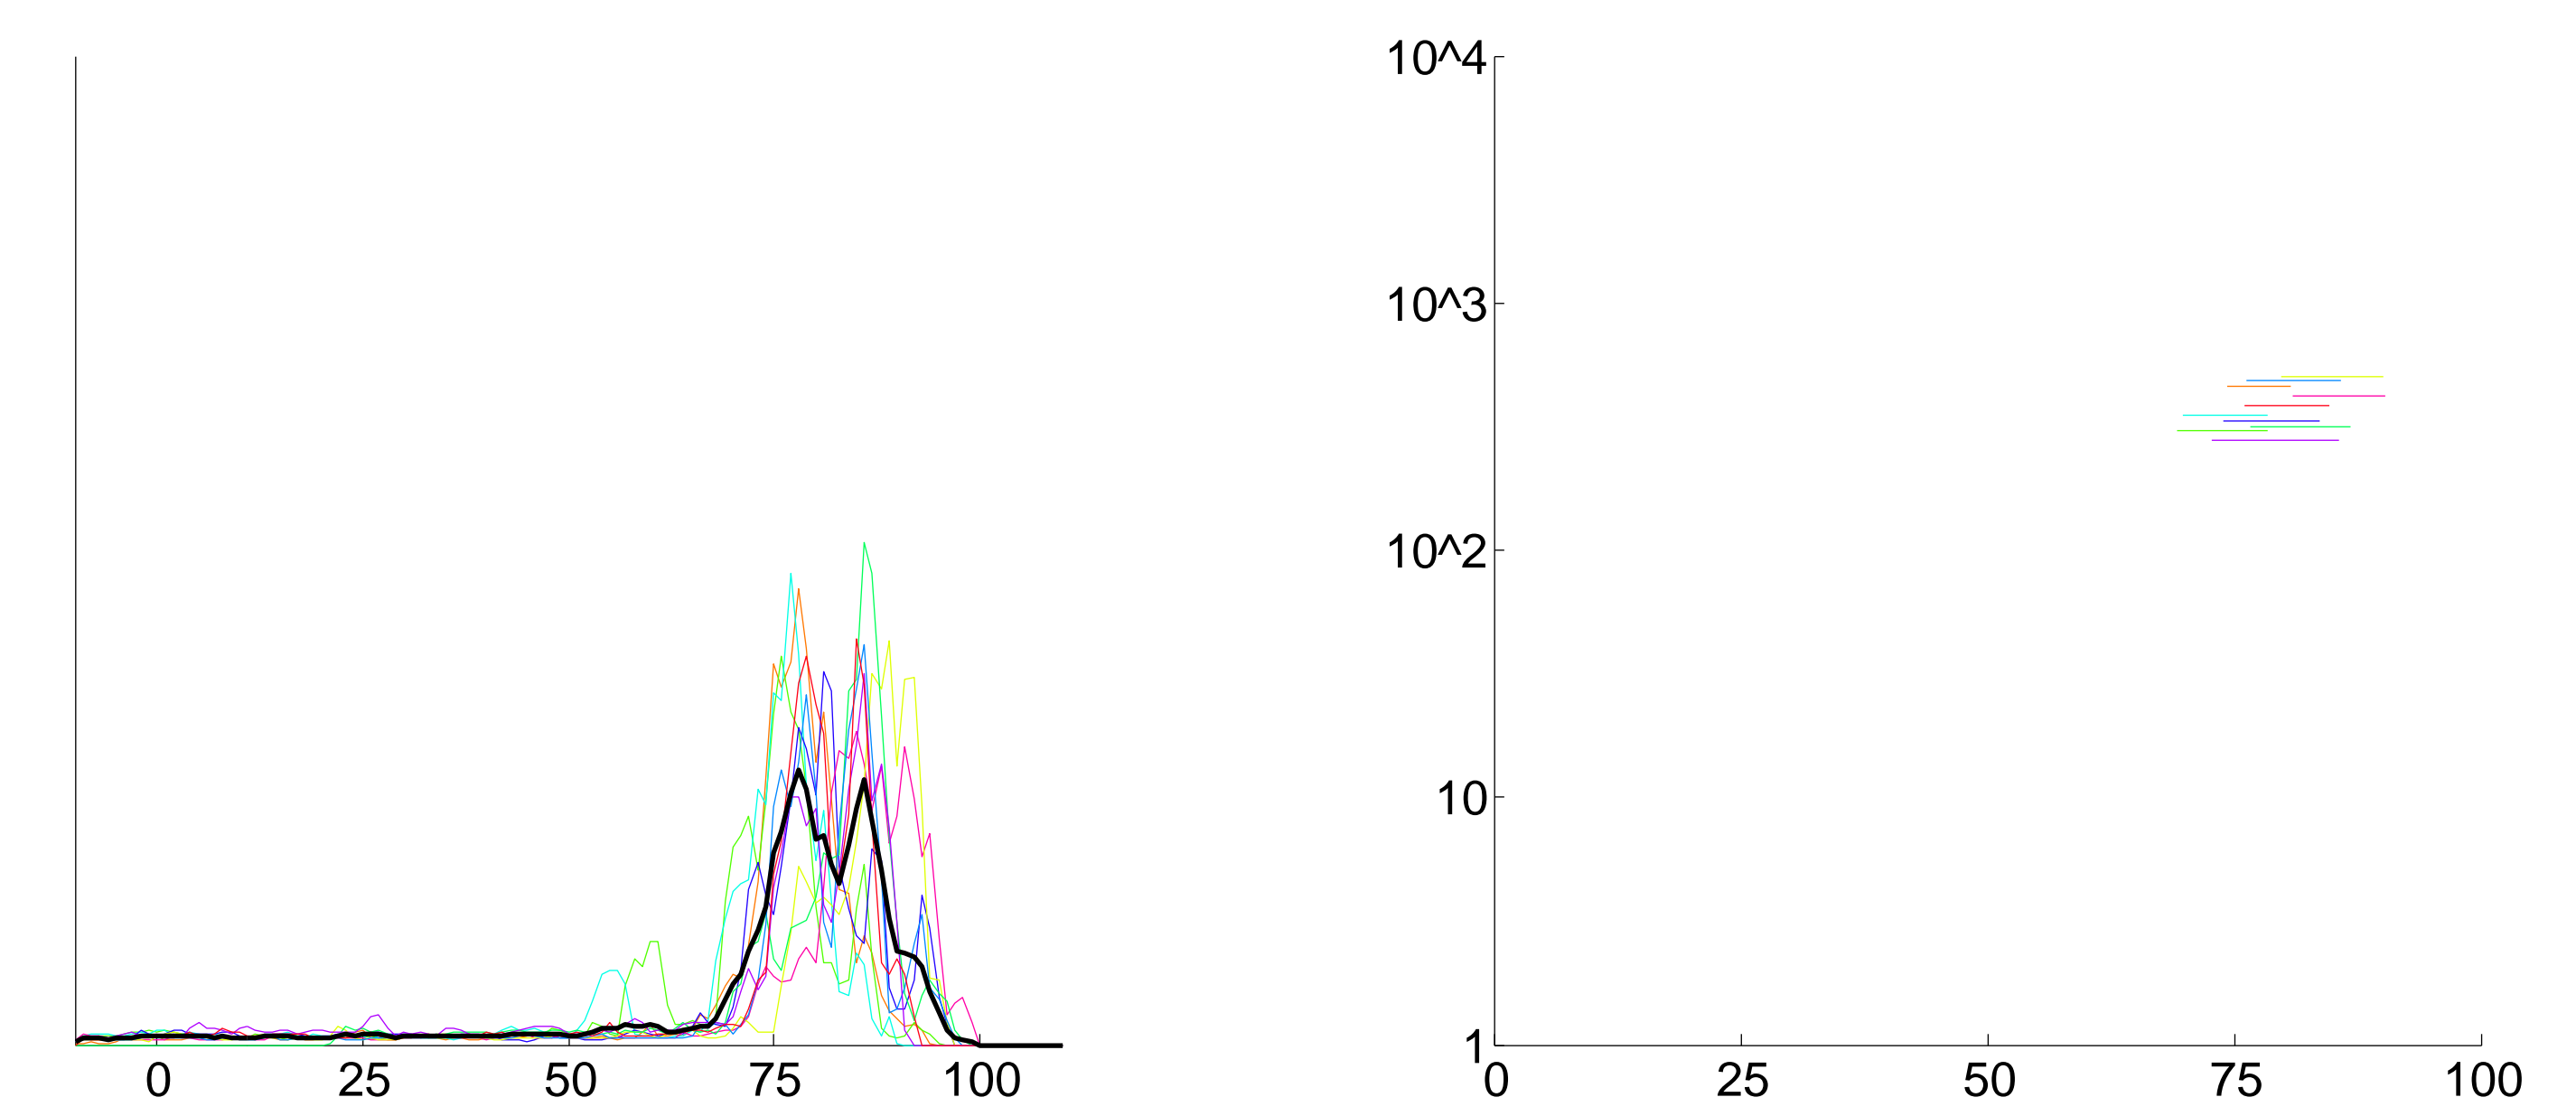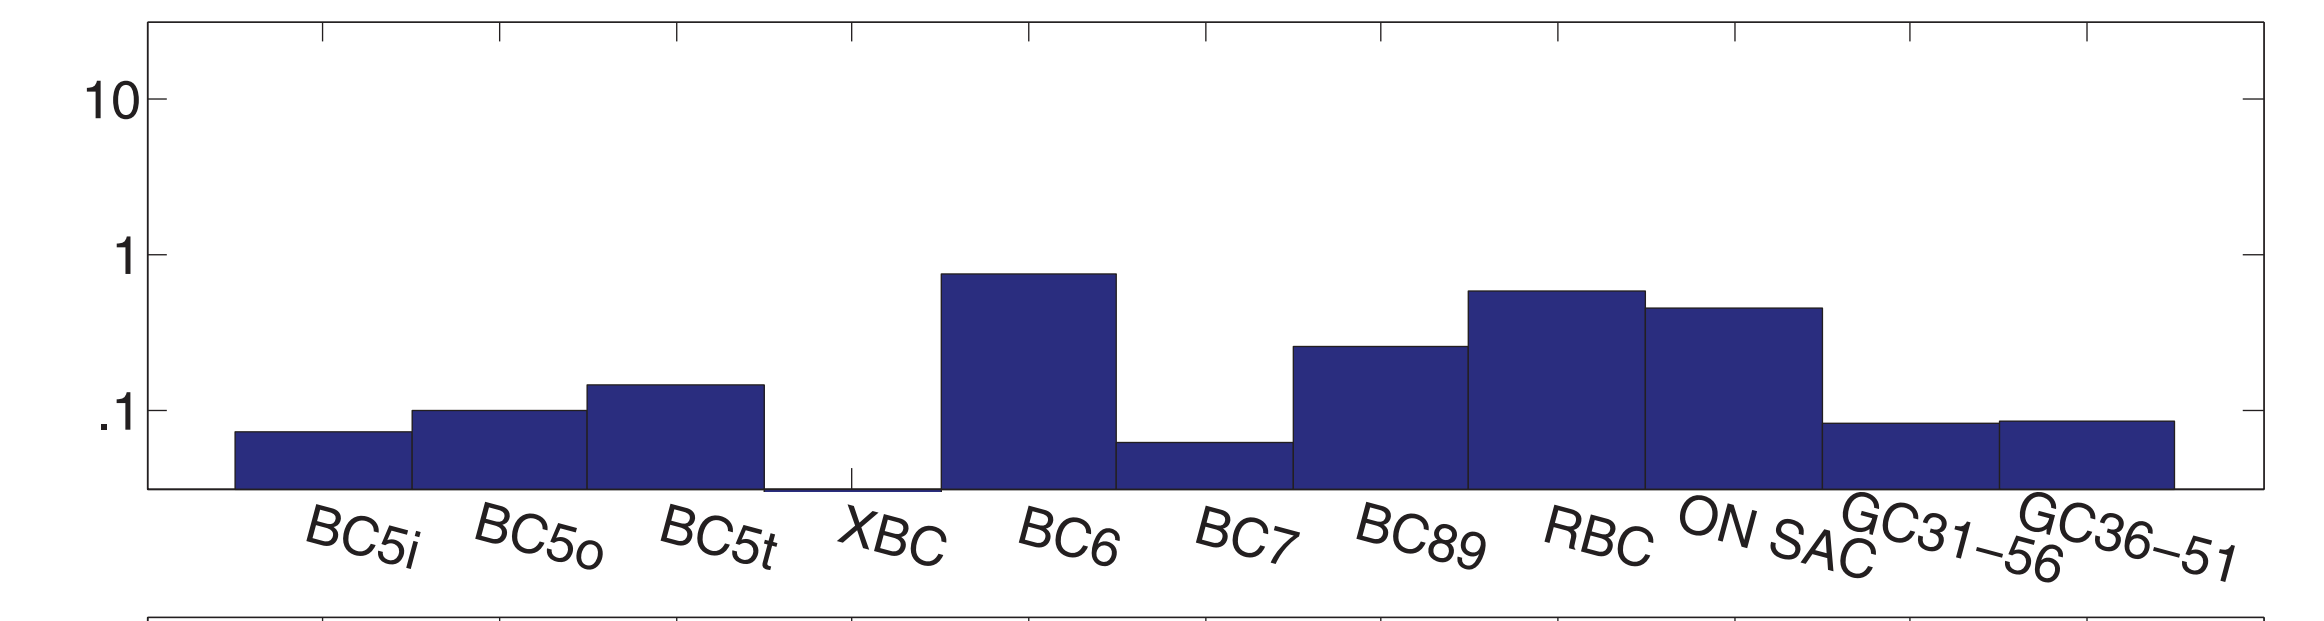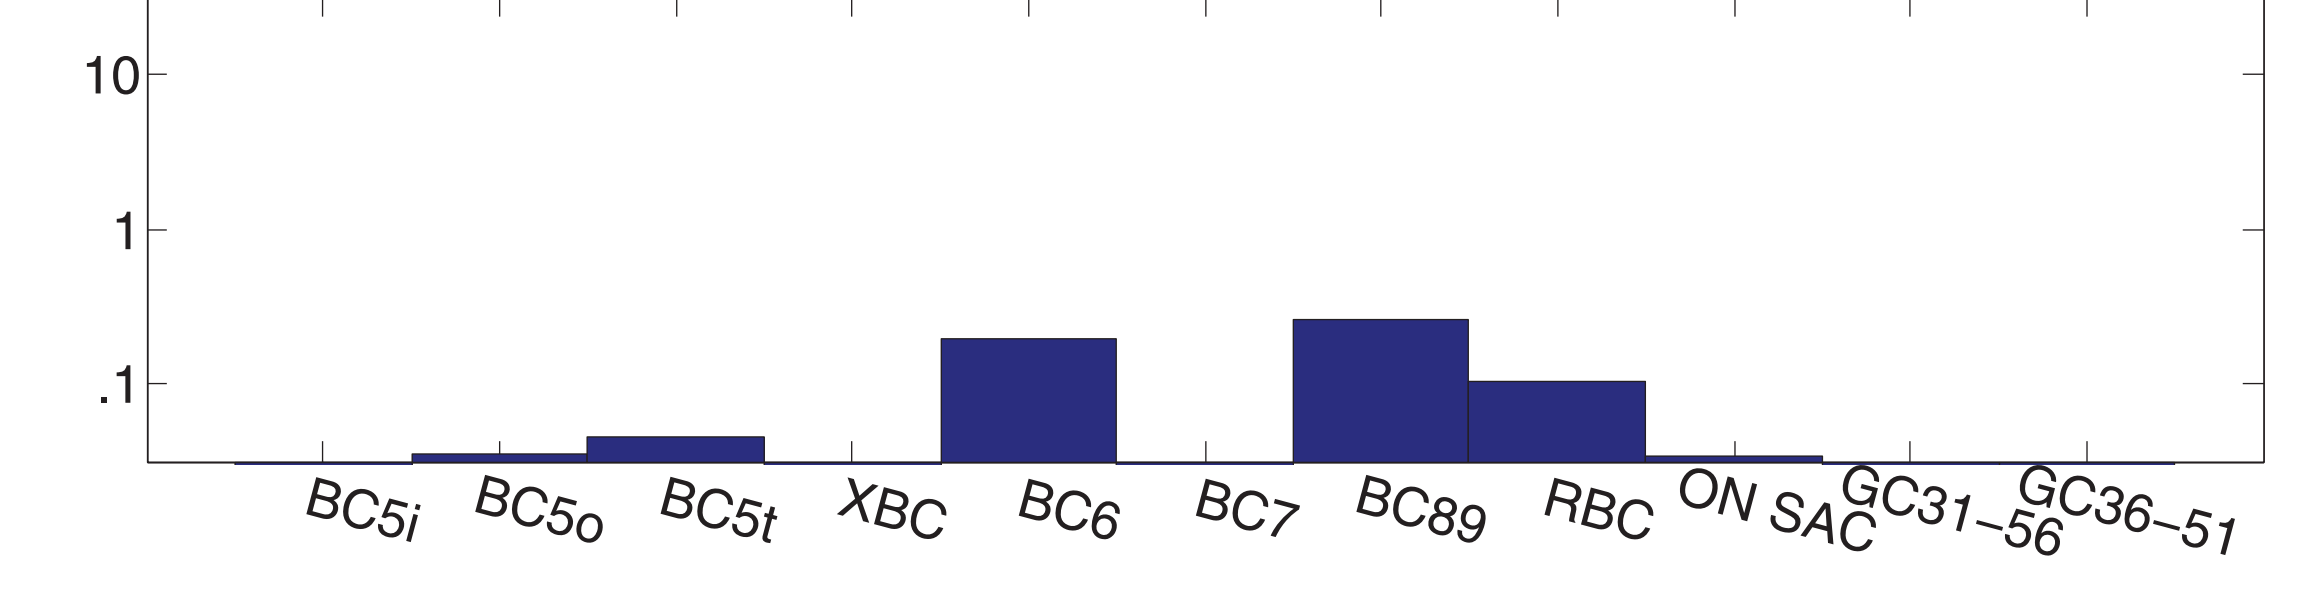

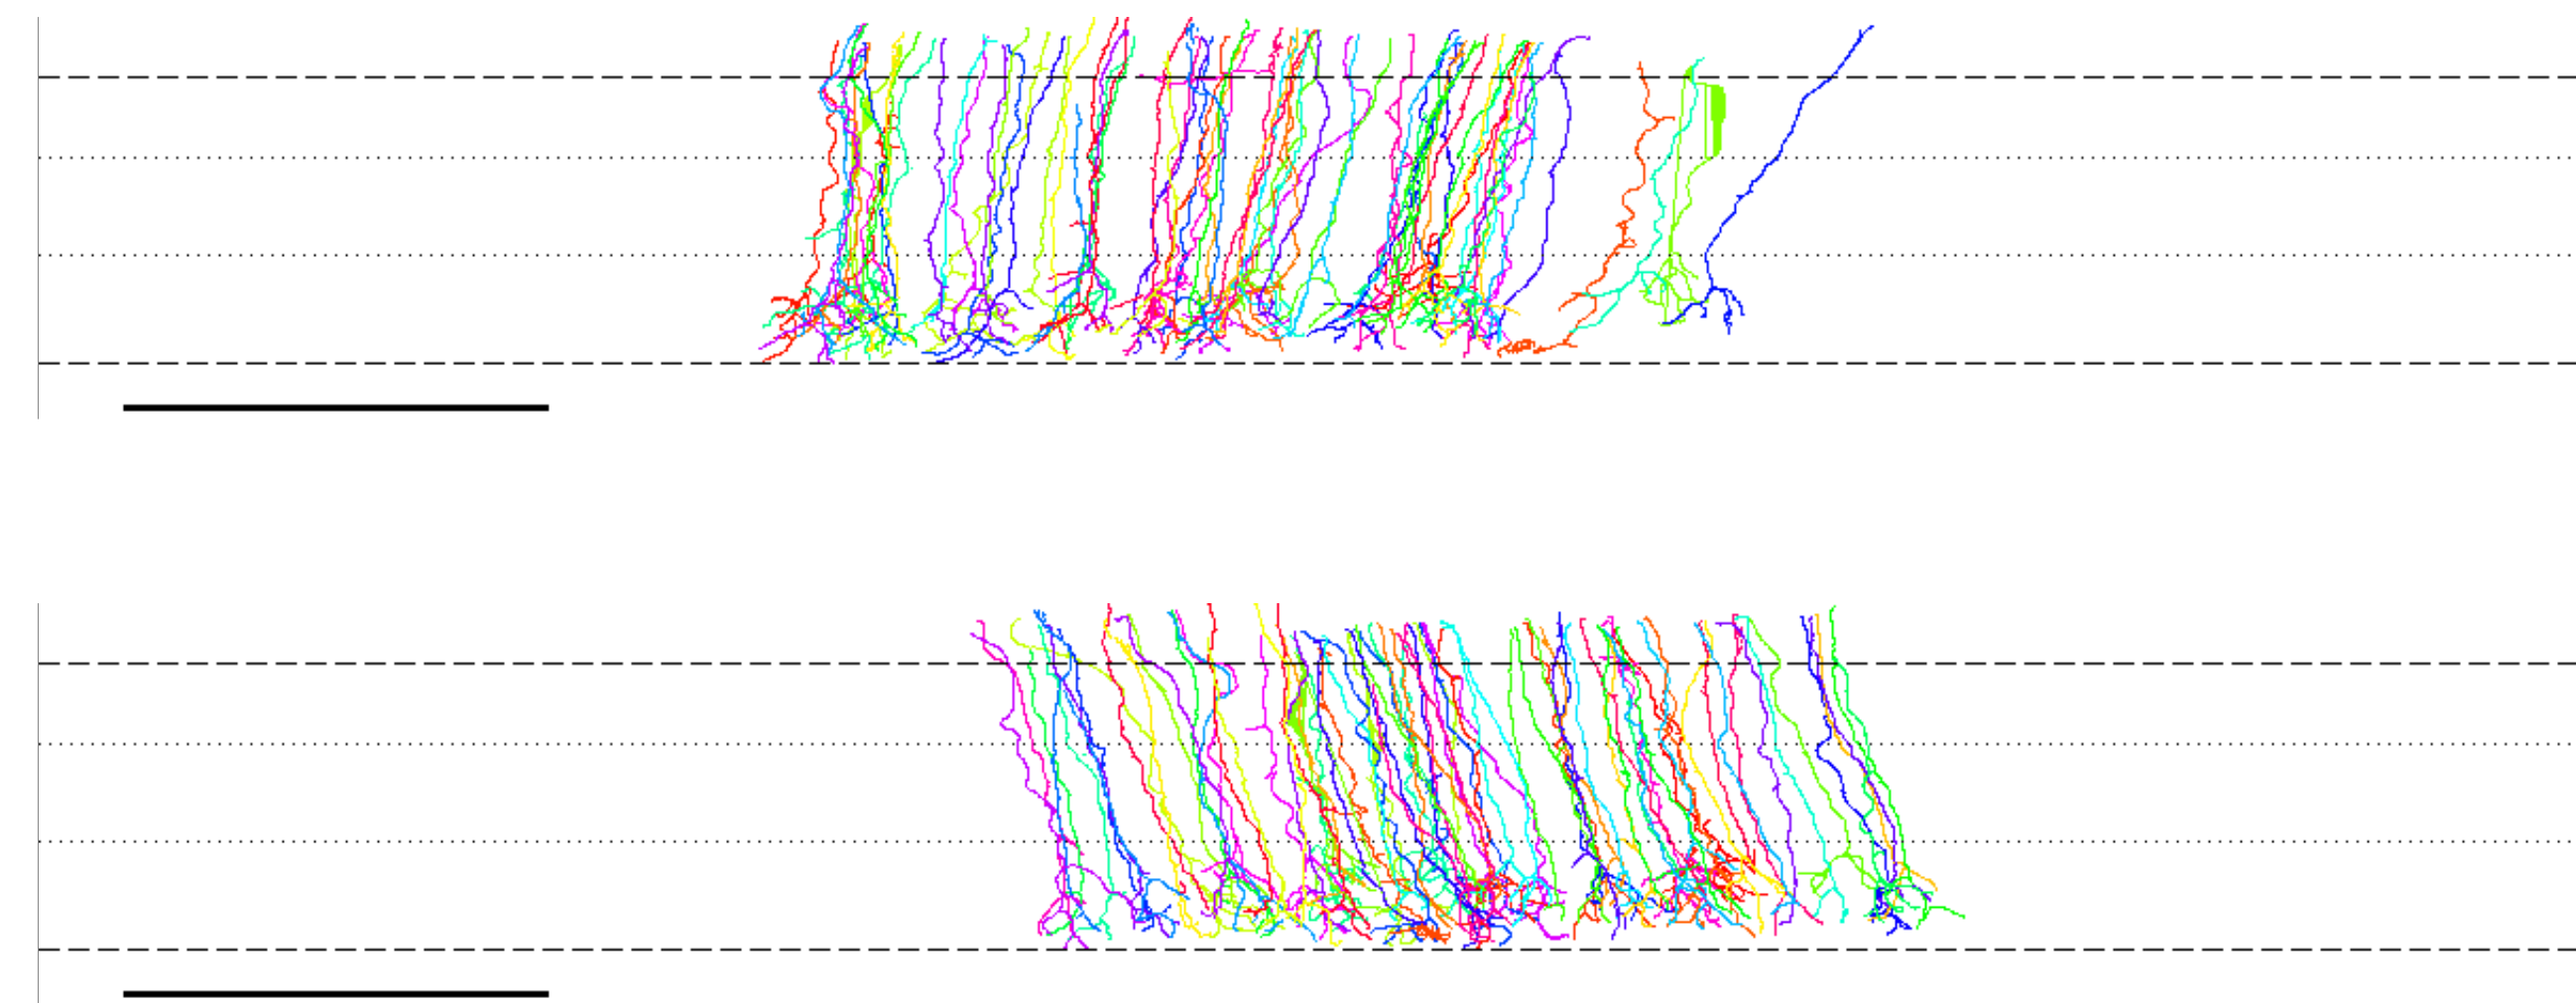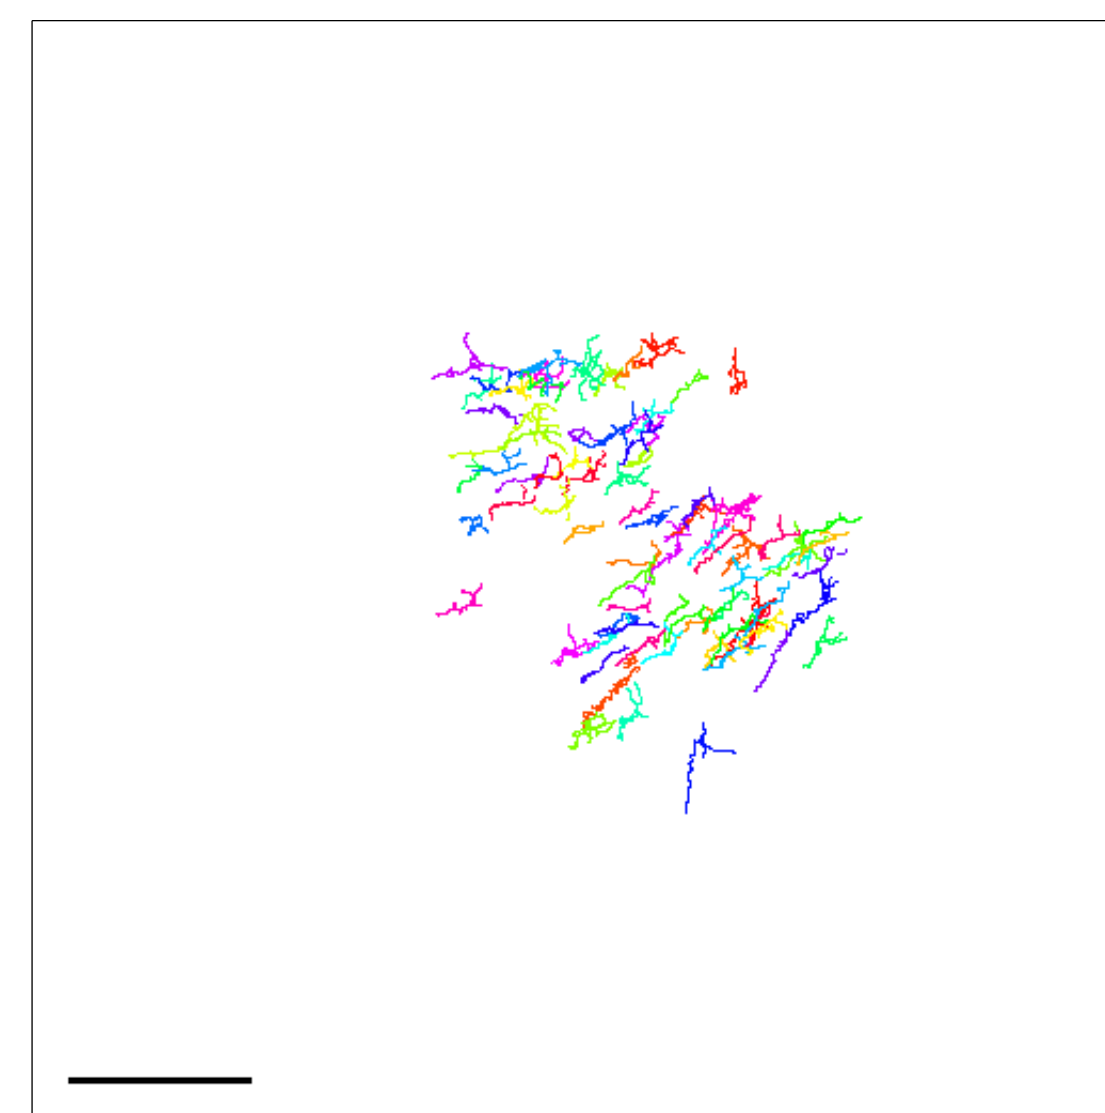

RBC

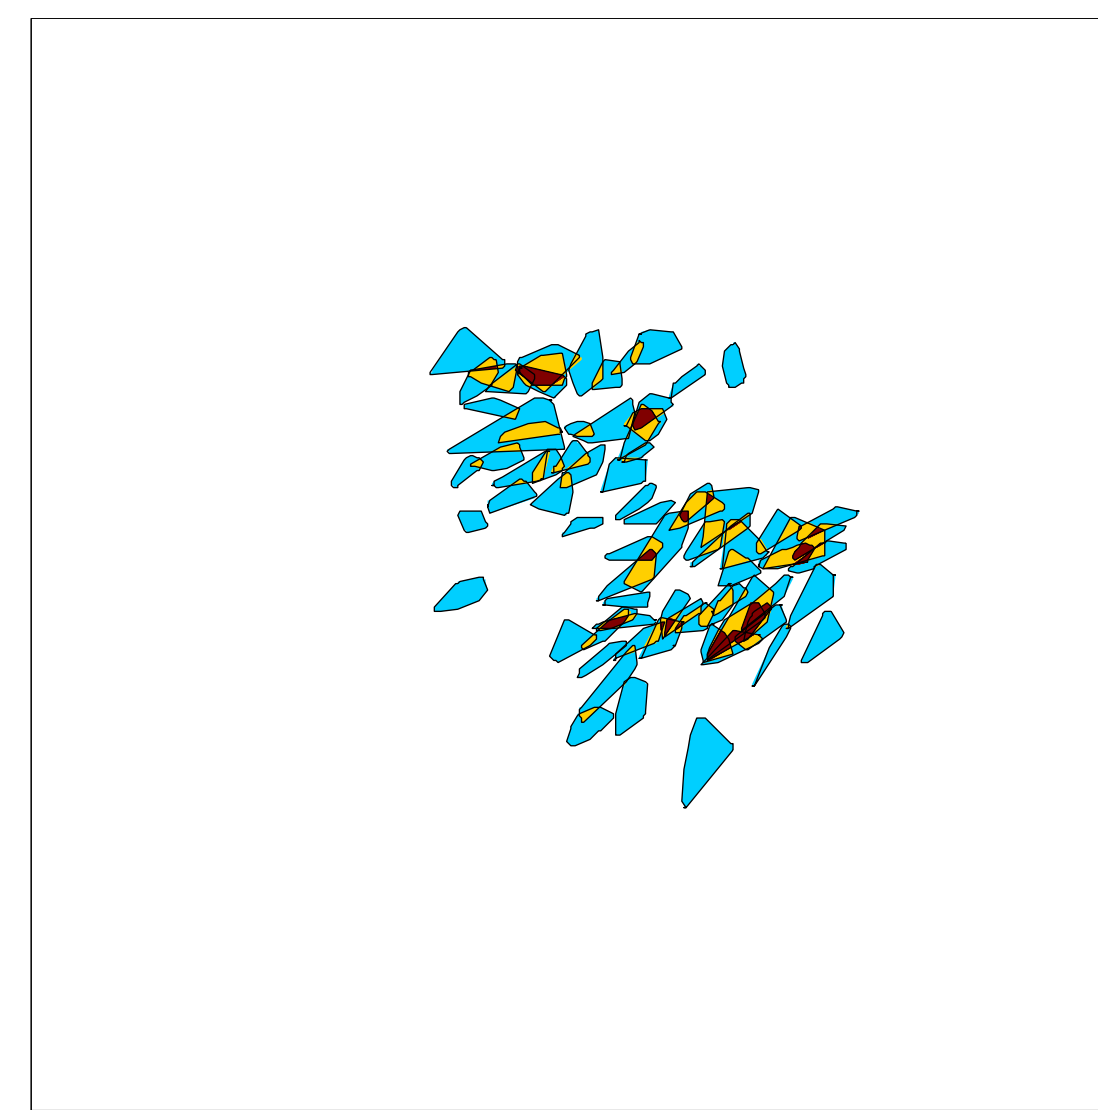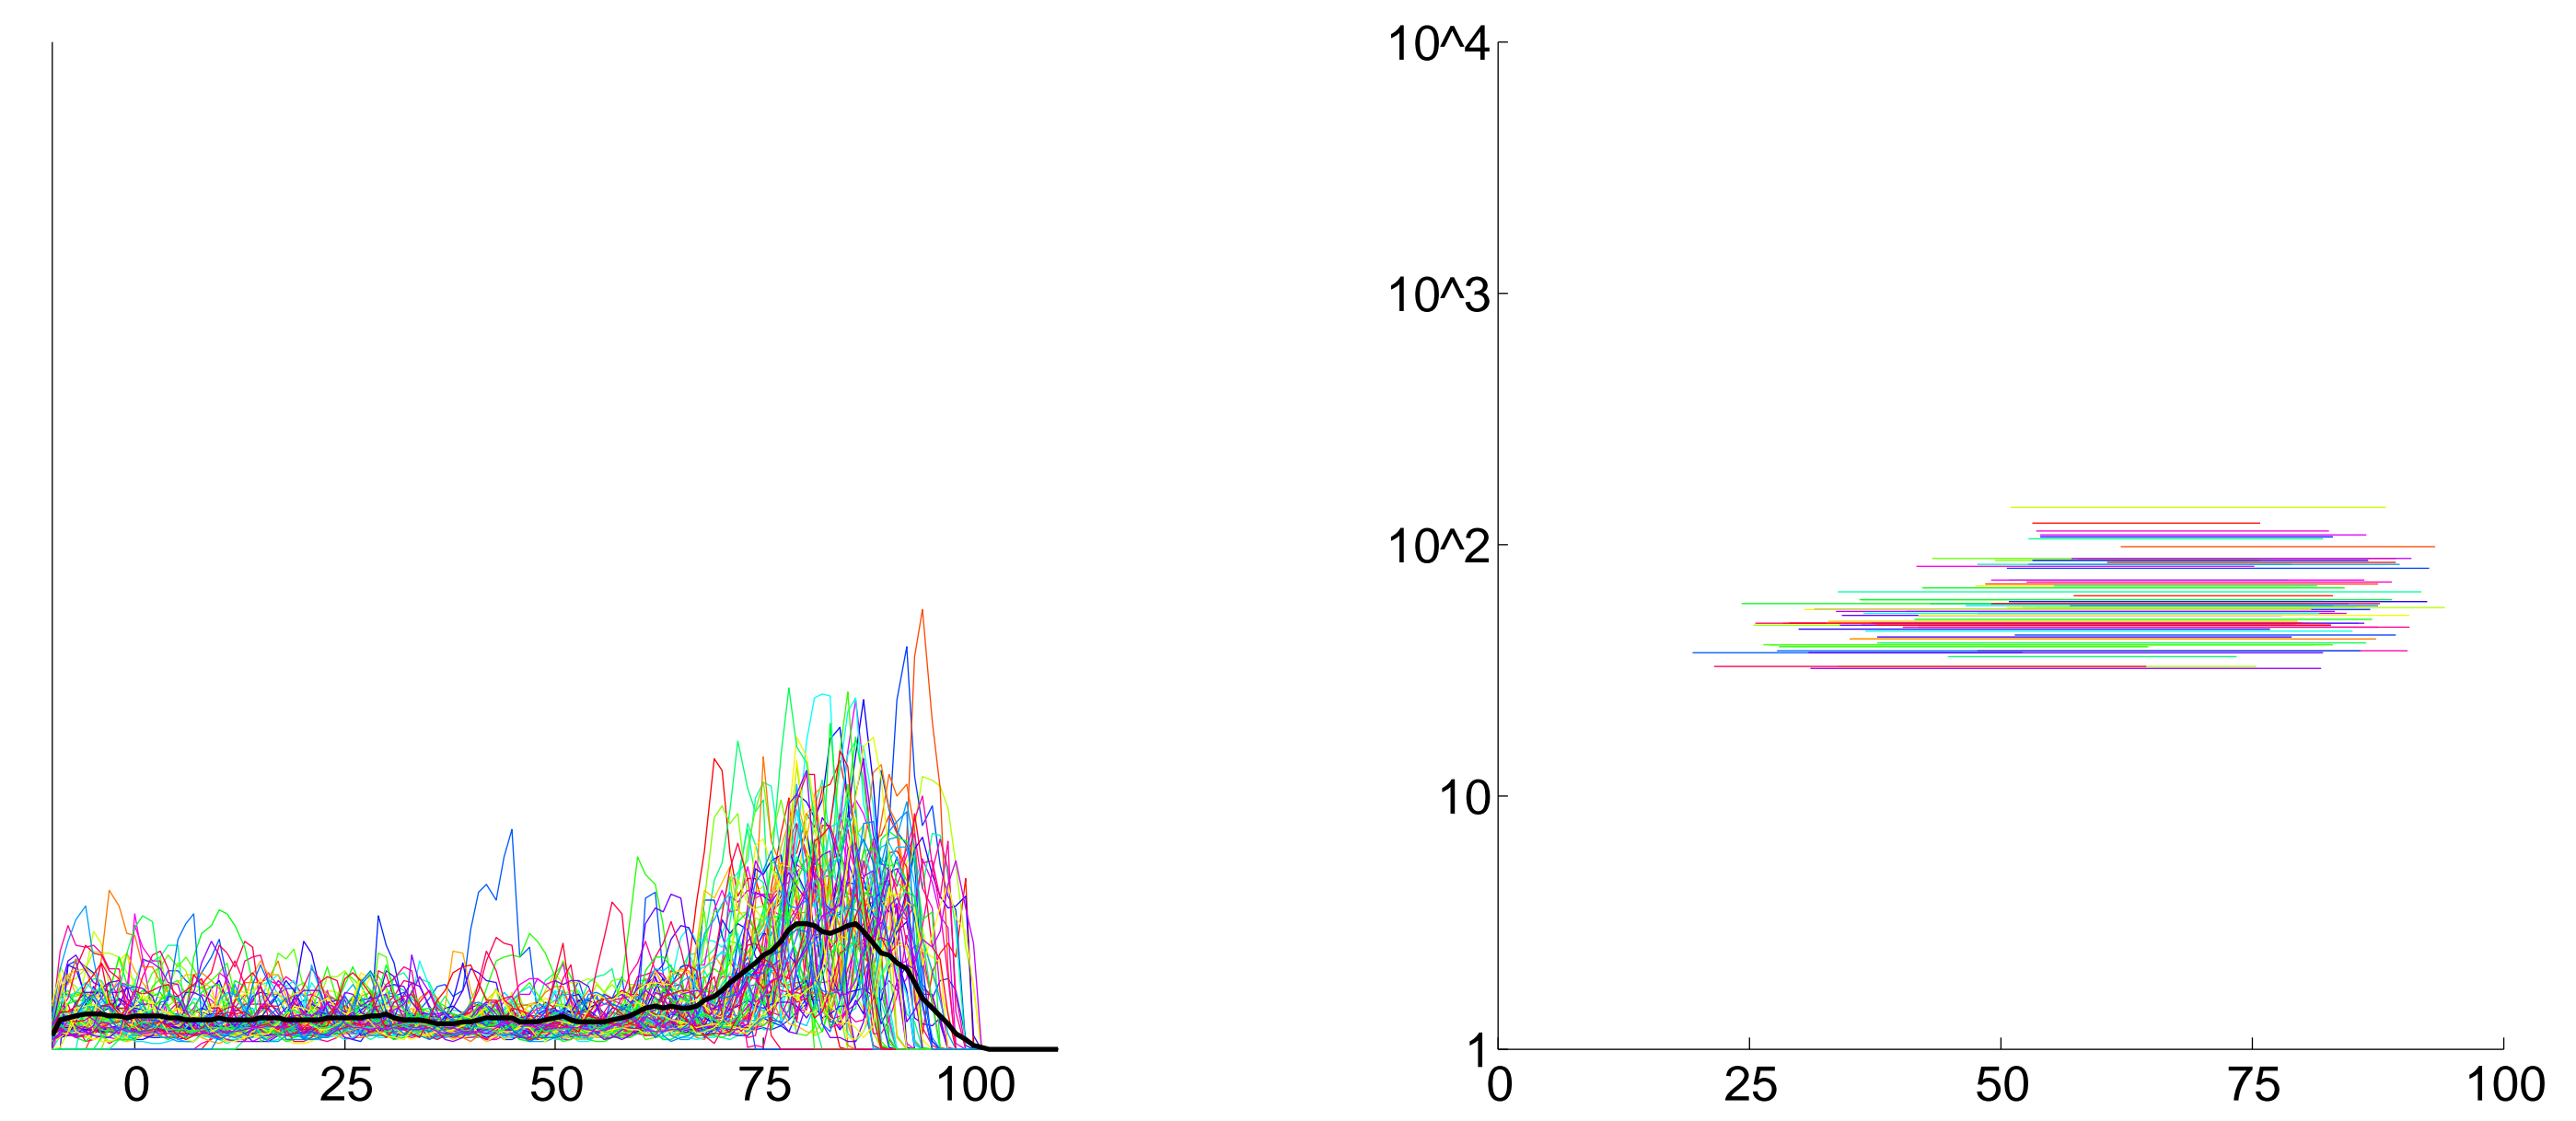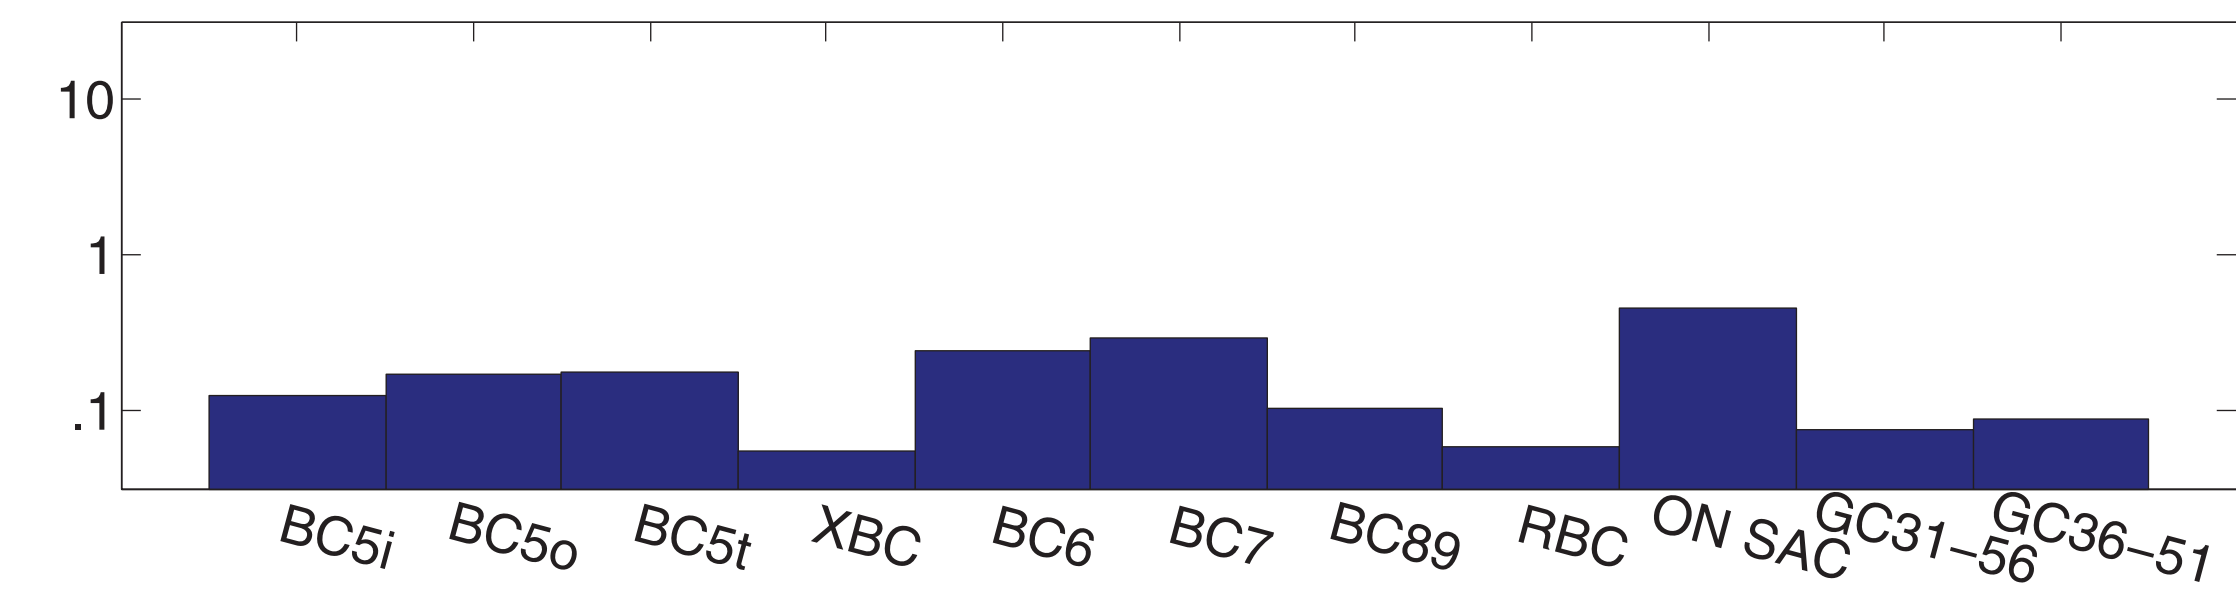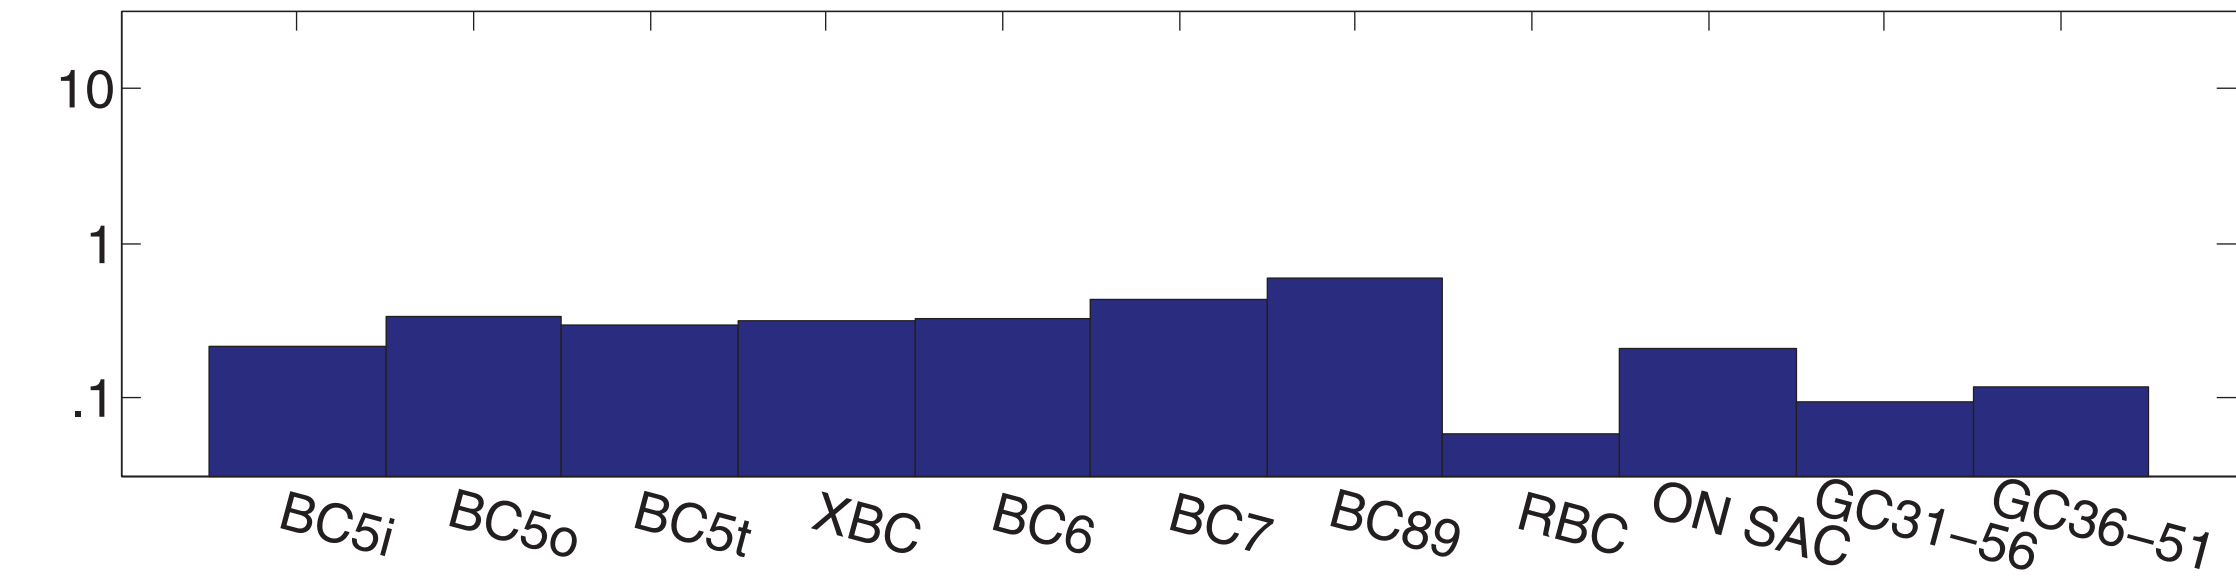



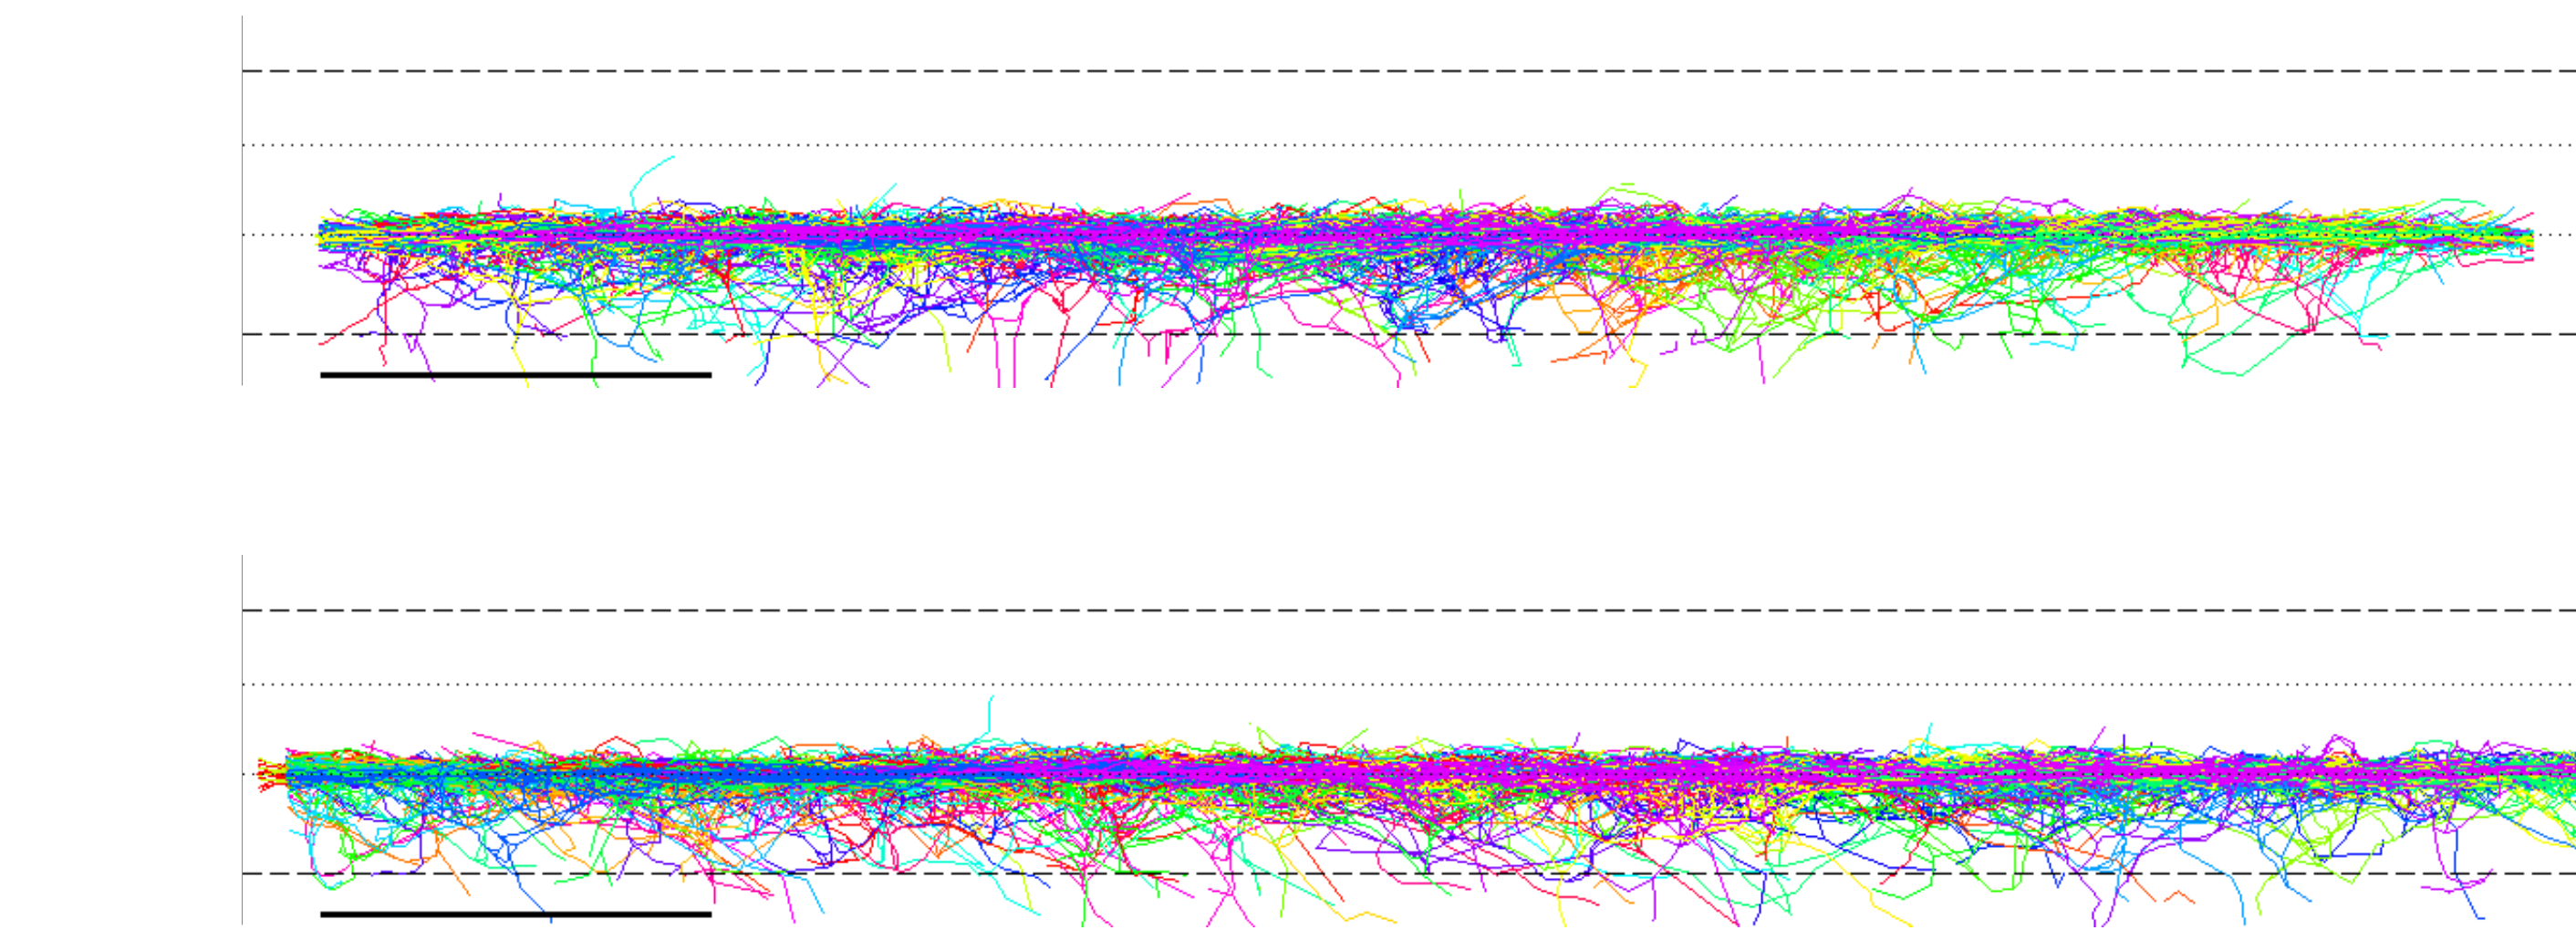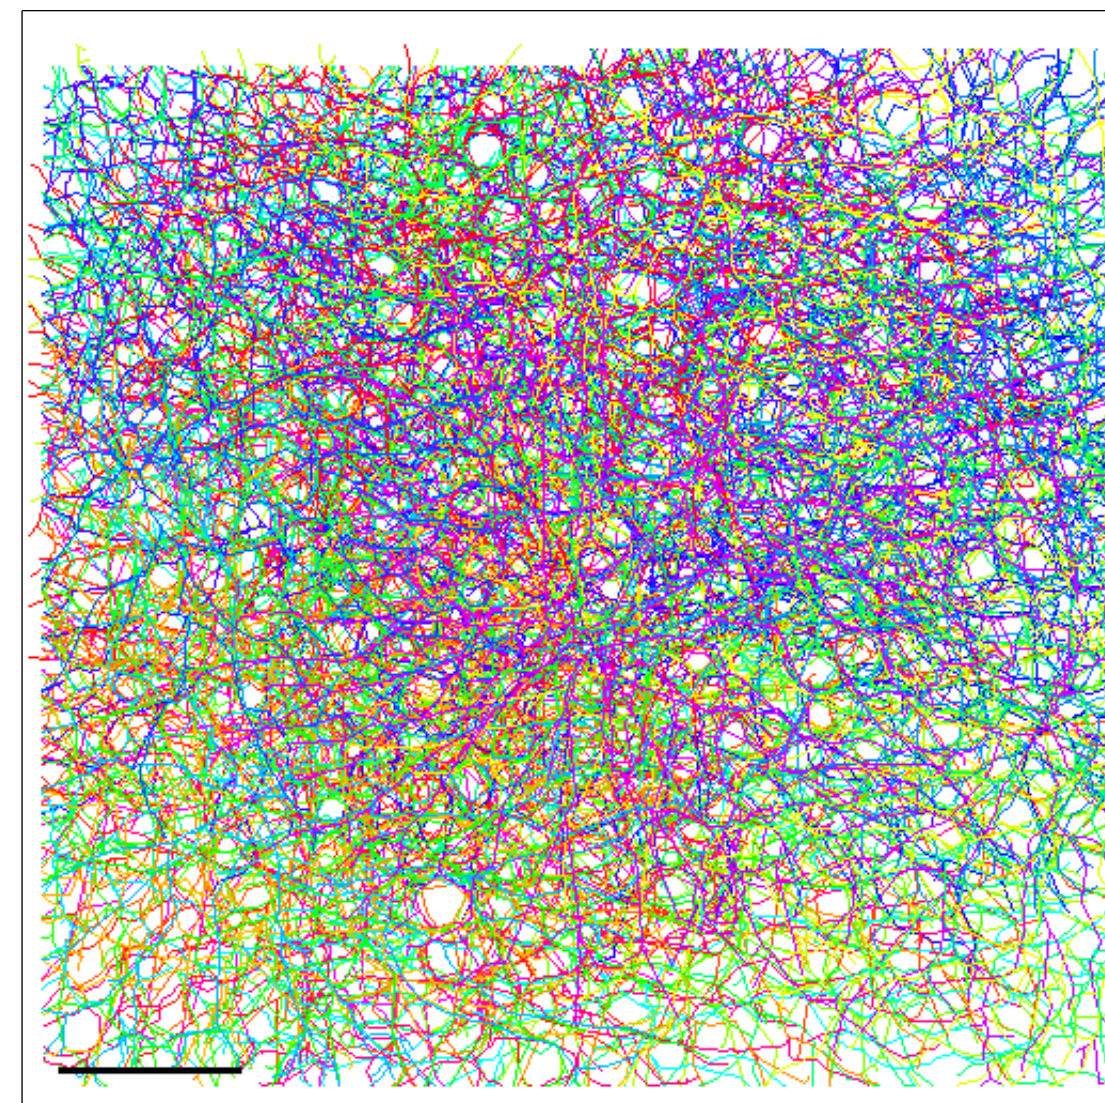

ON SAC

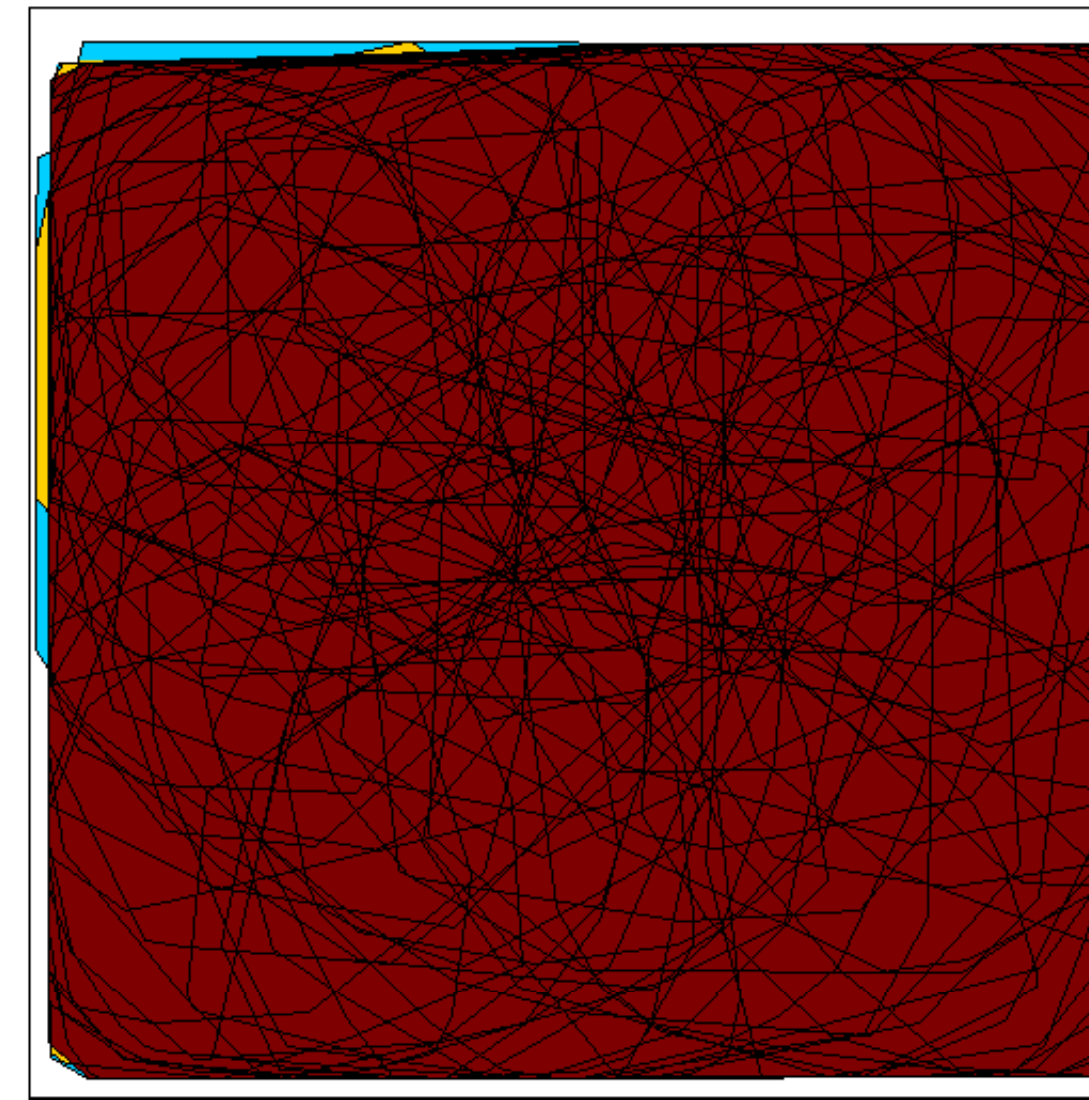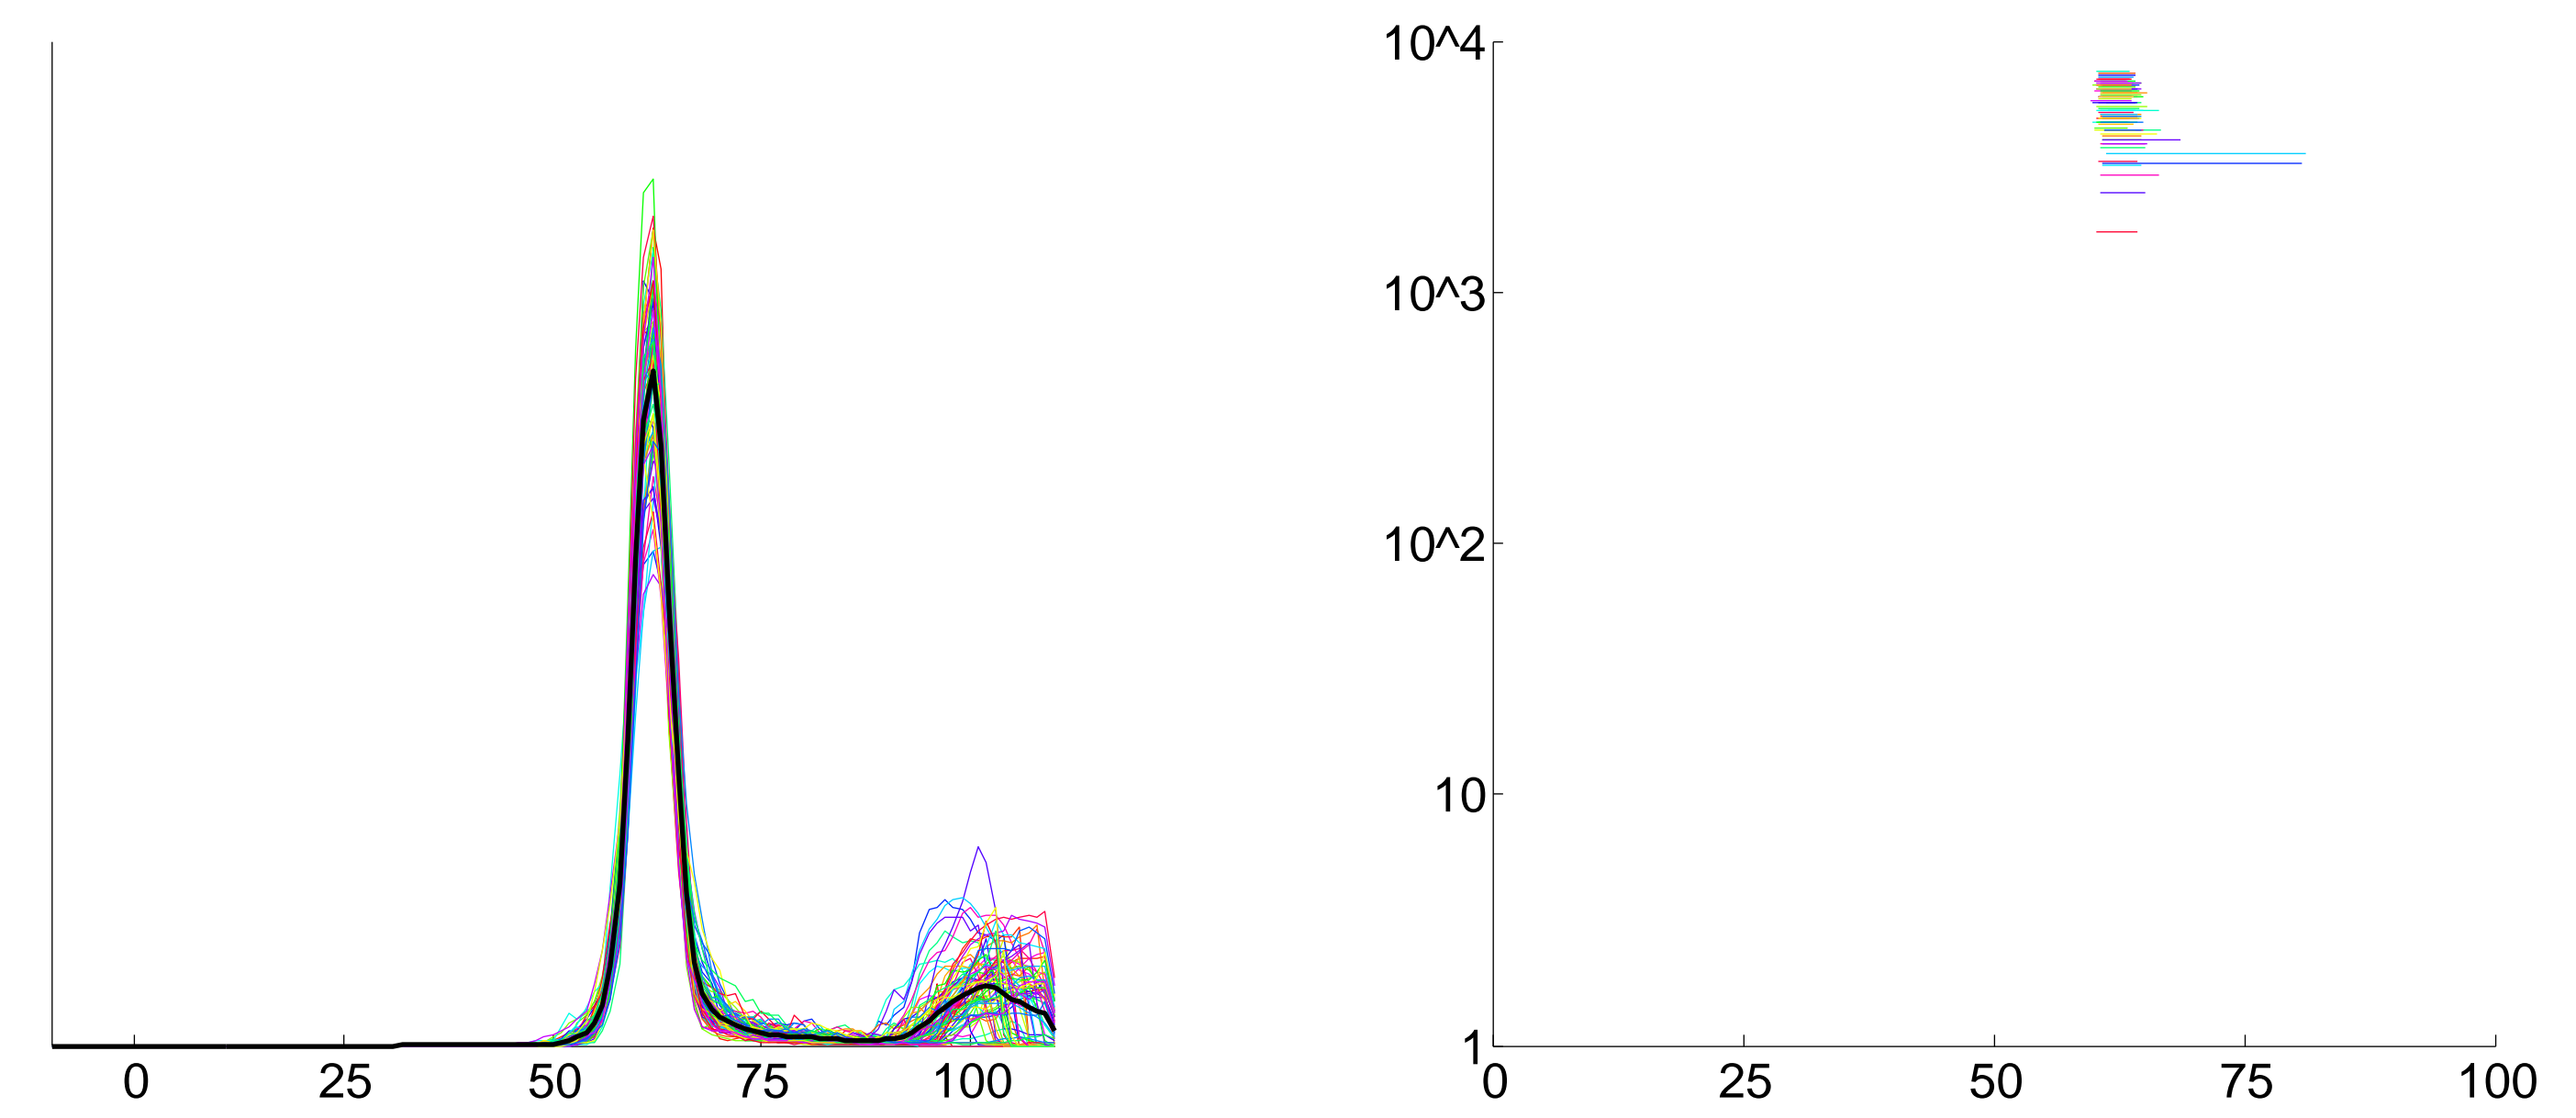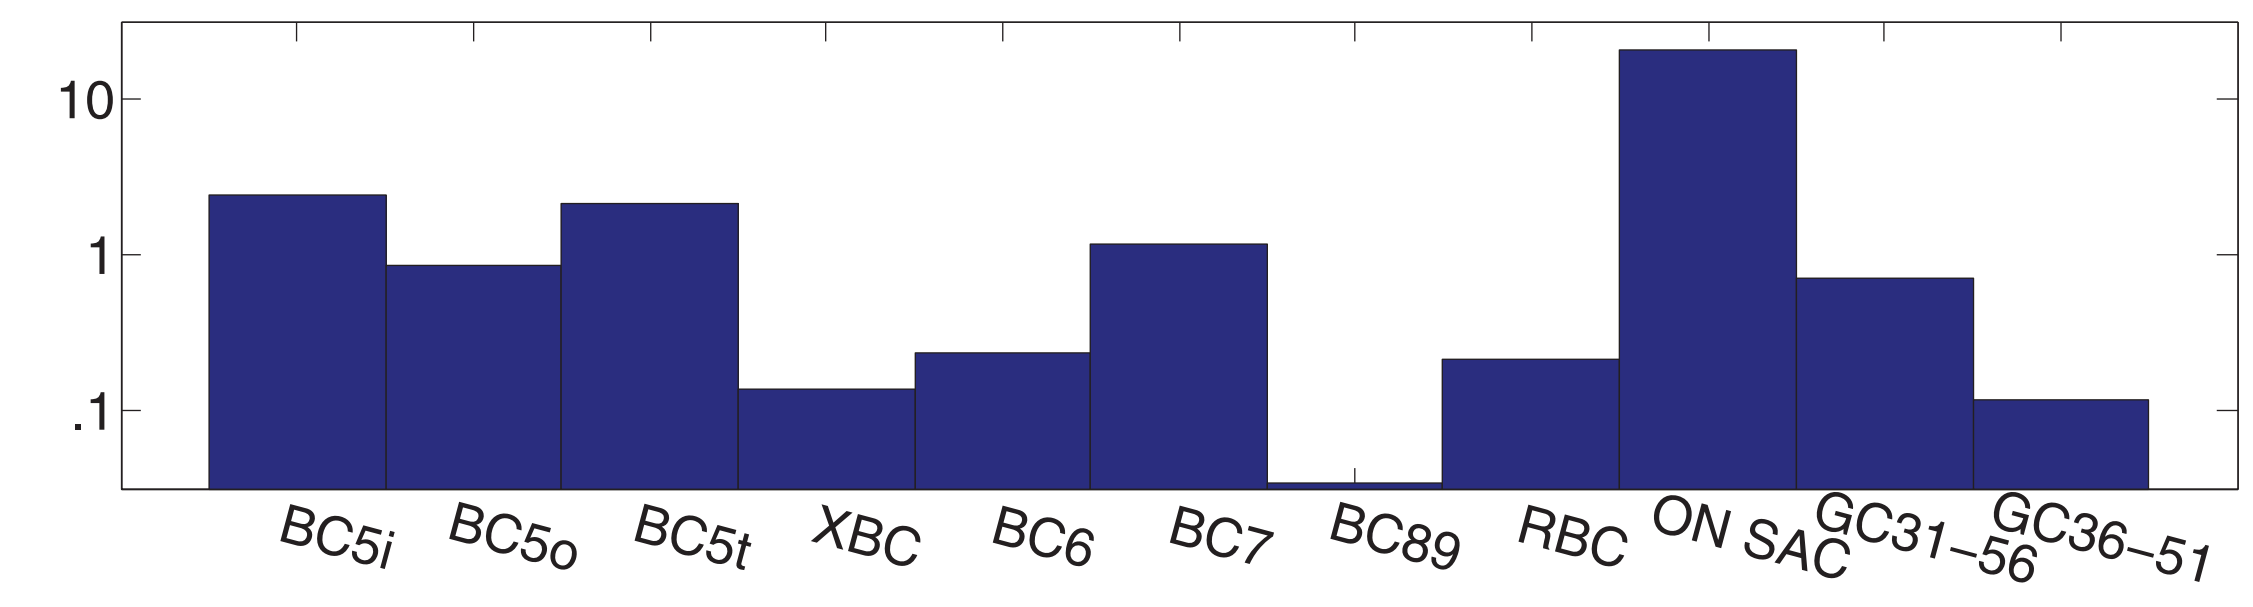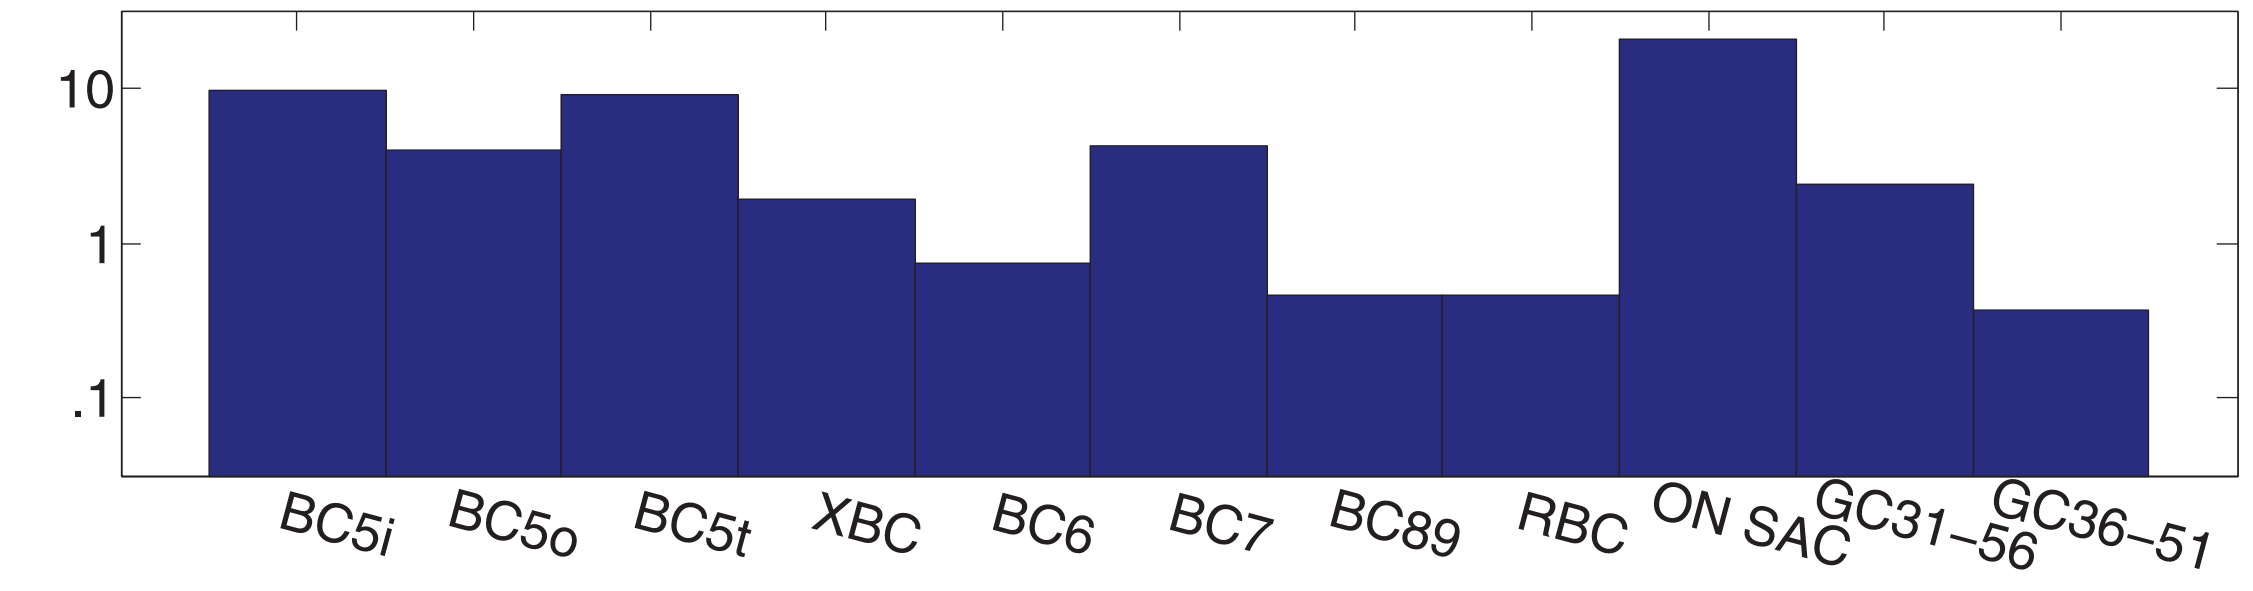

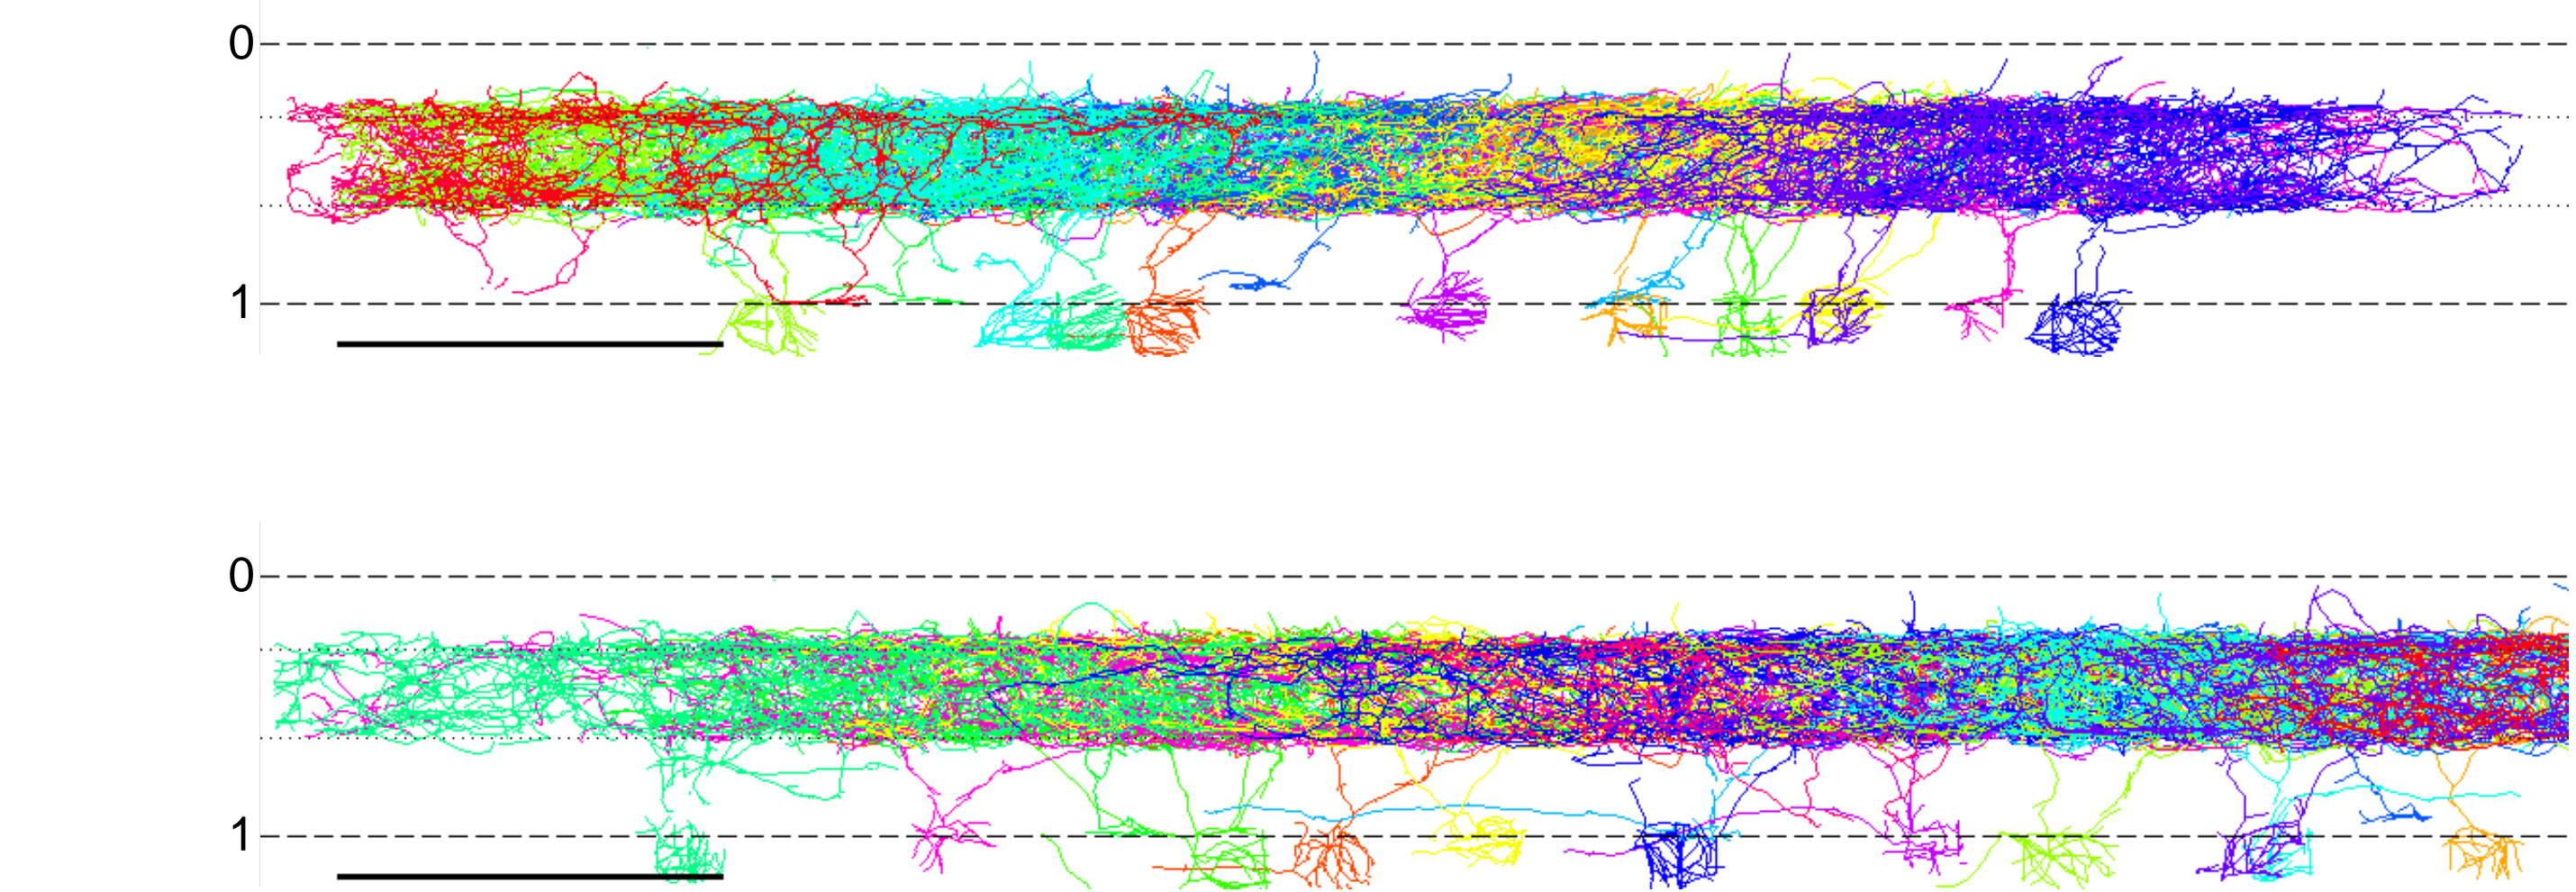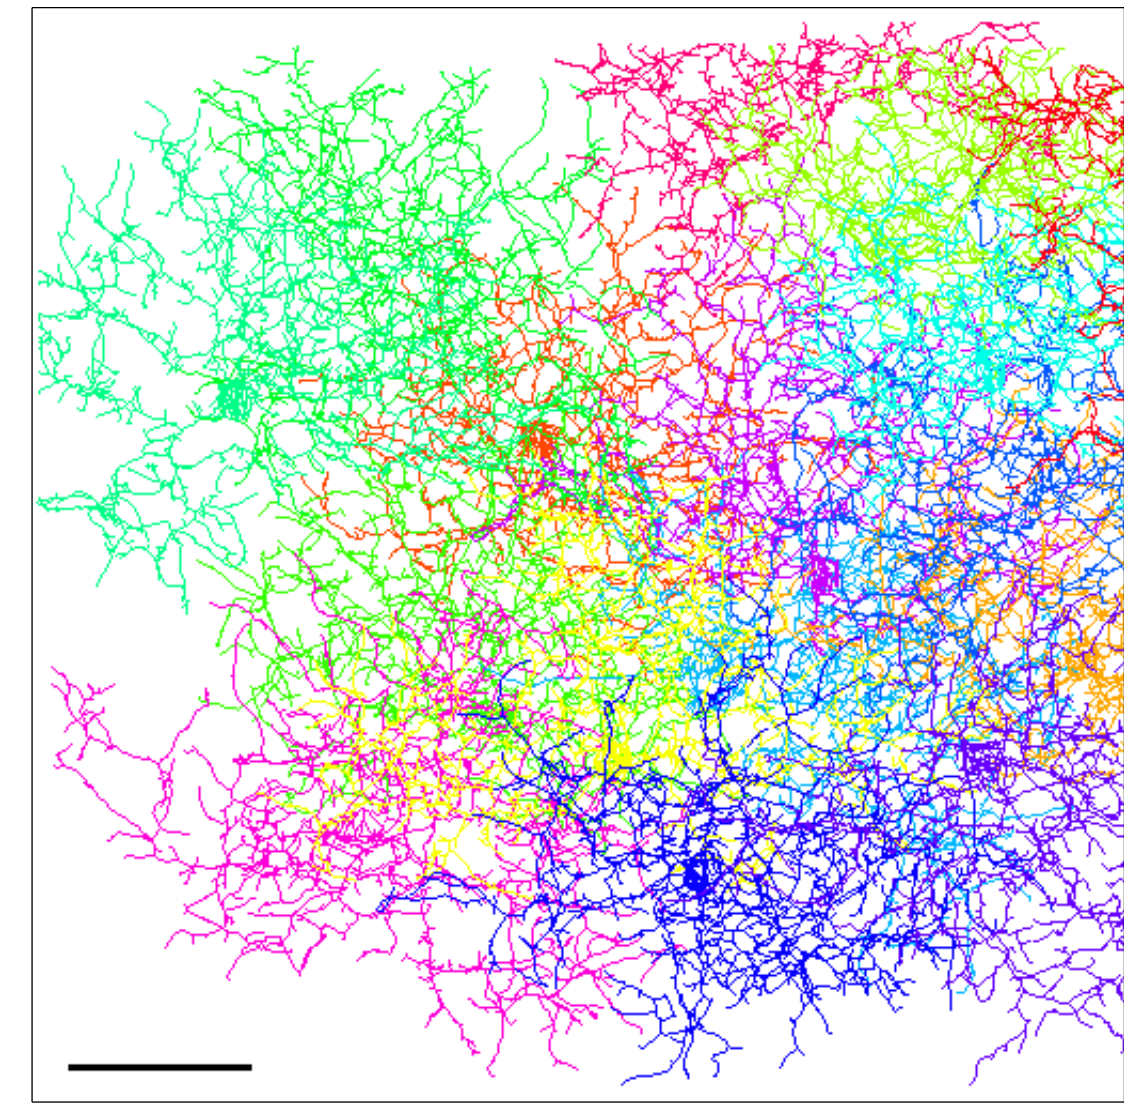

GC31-56

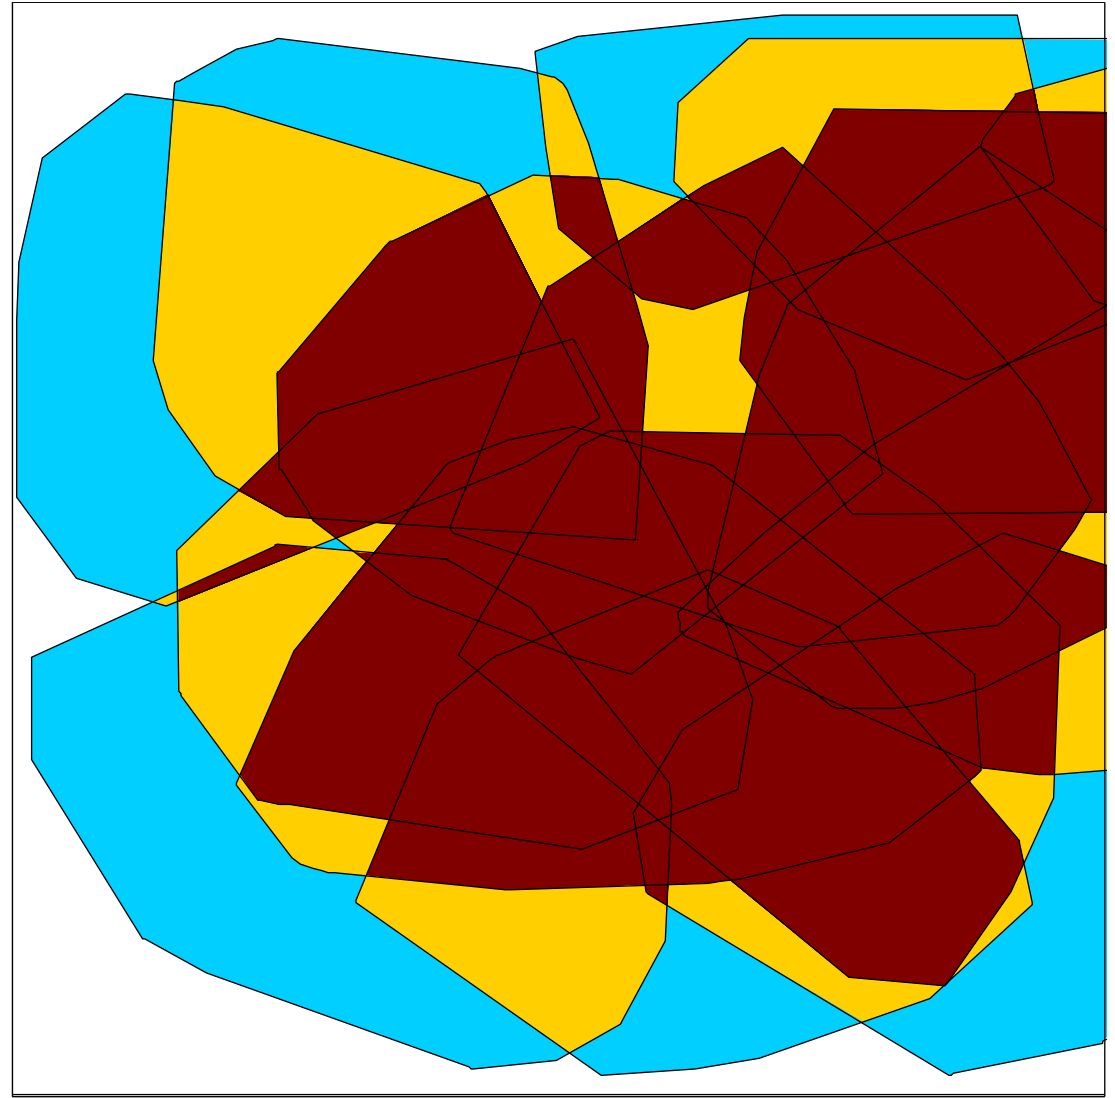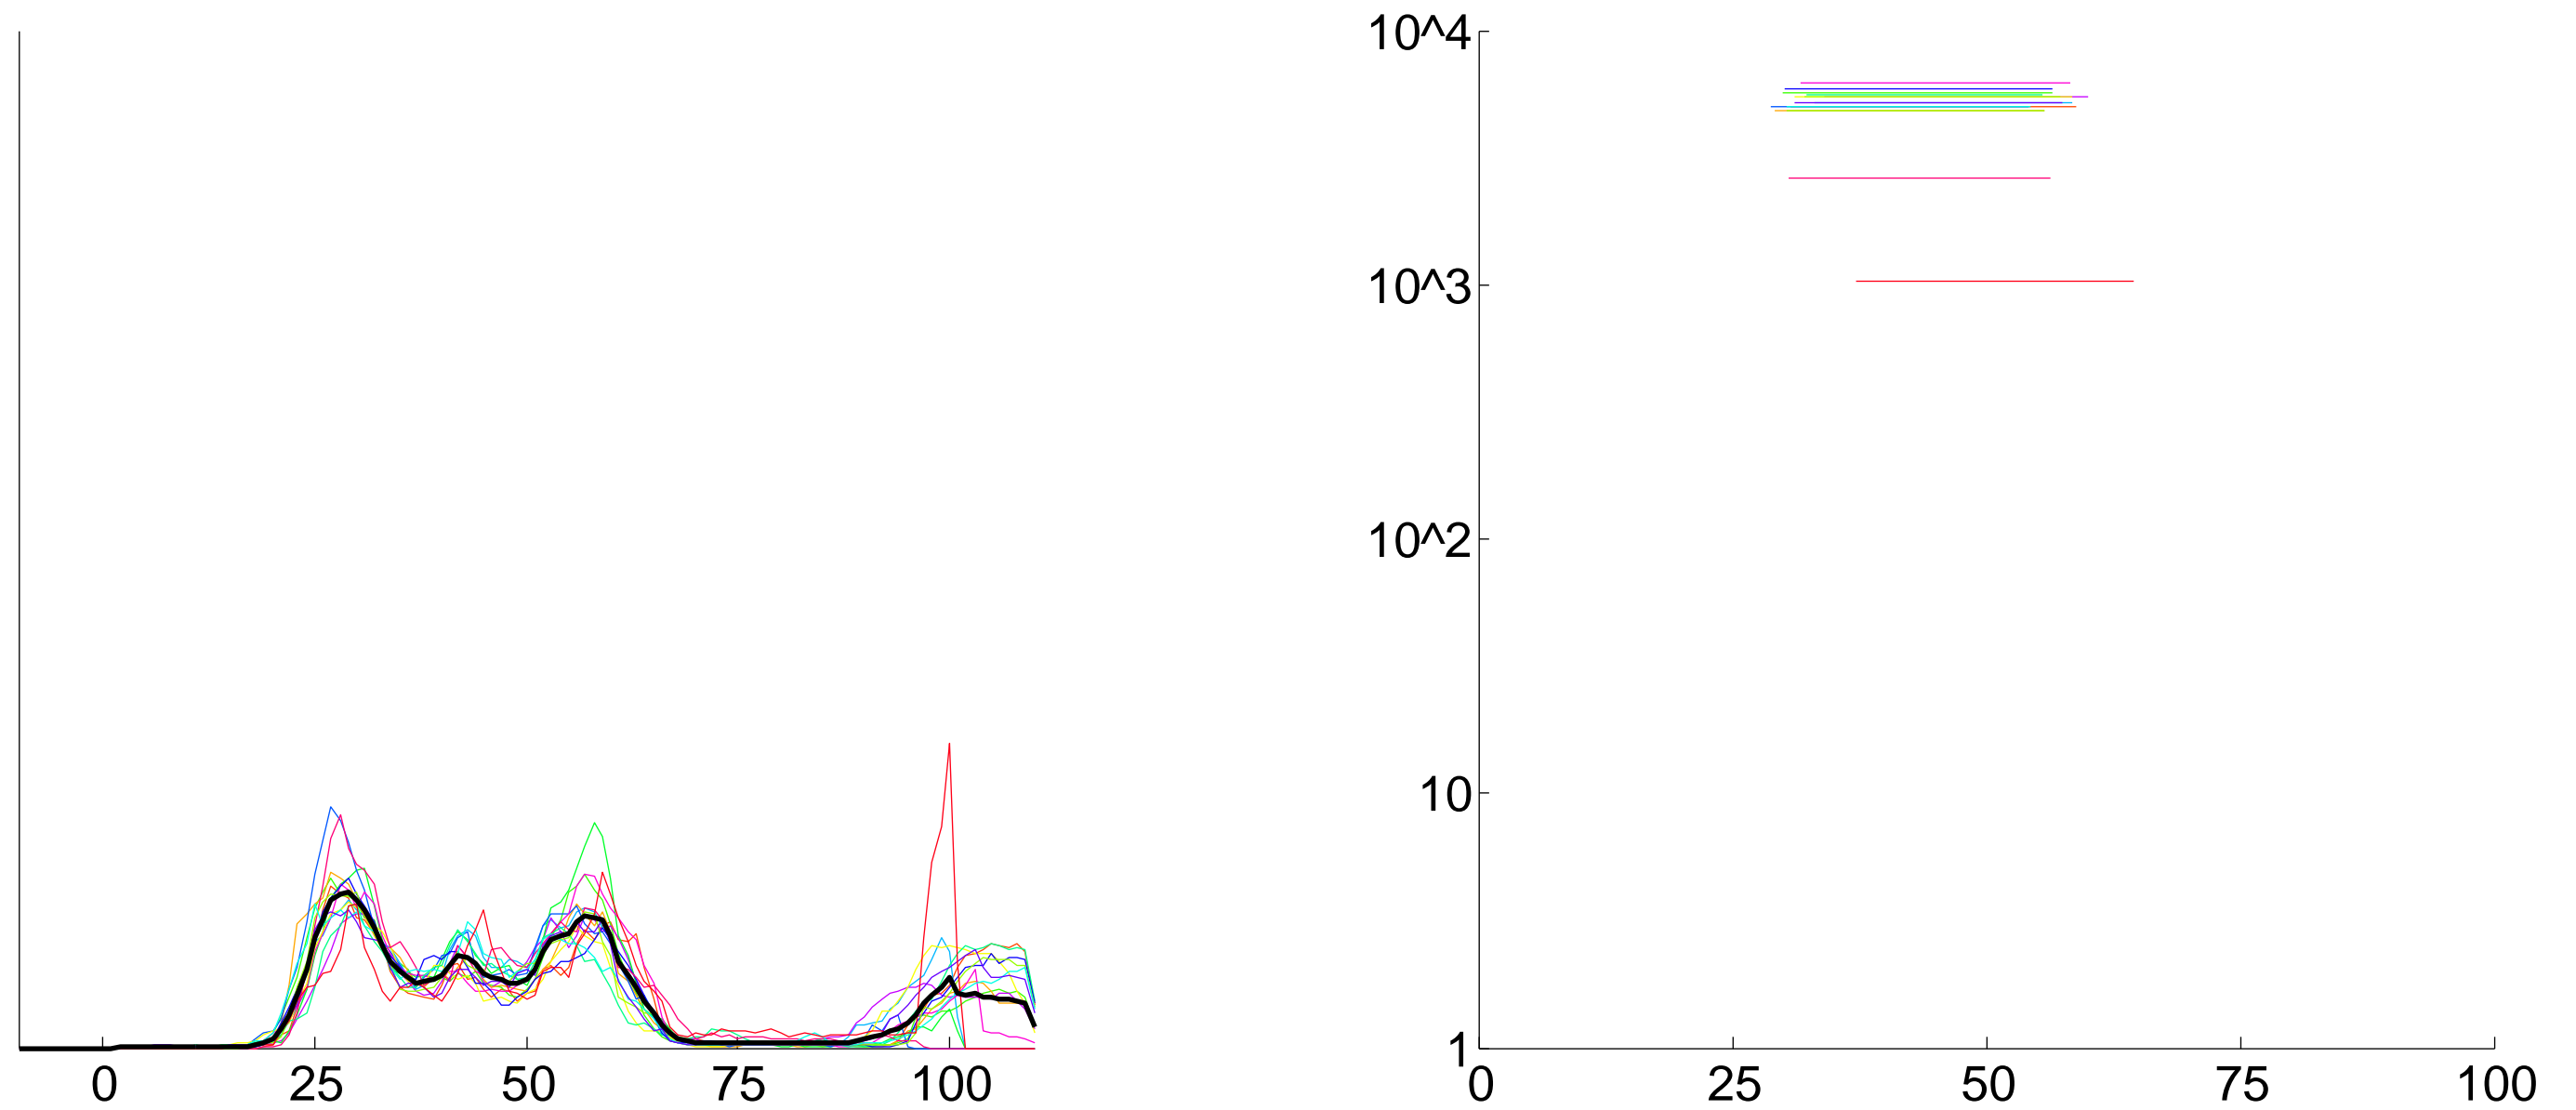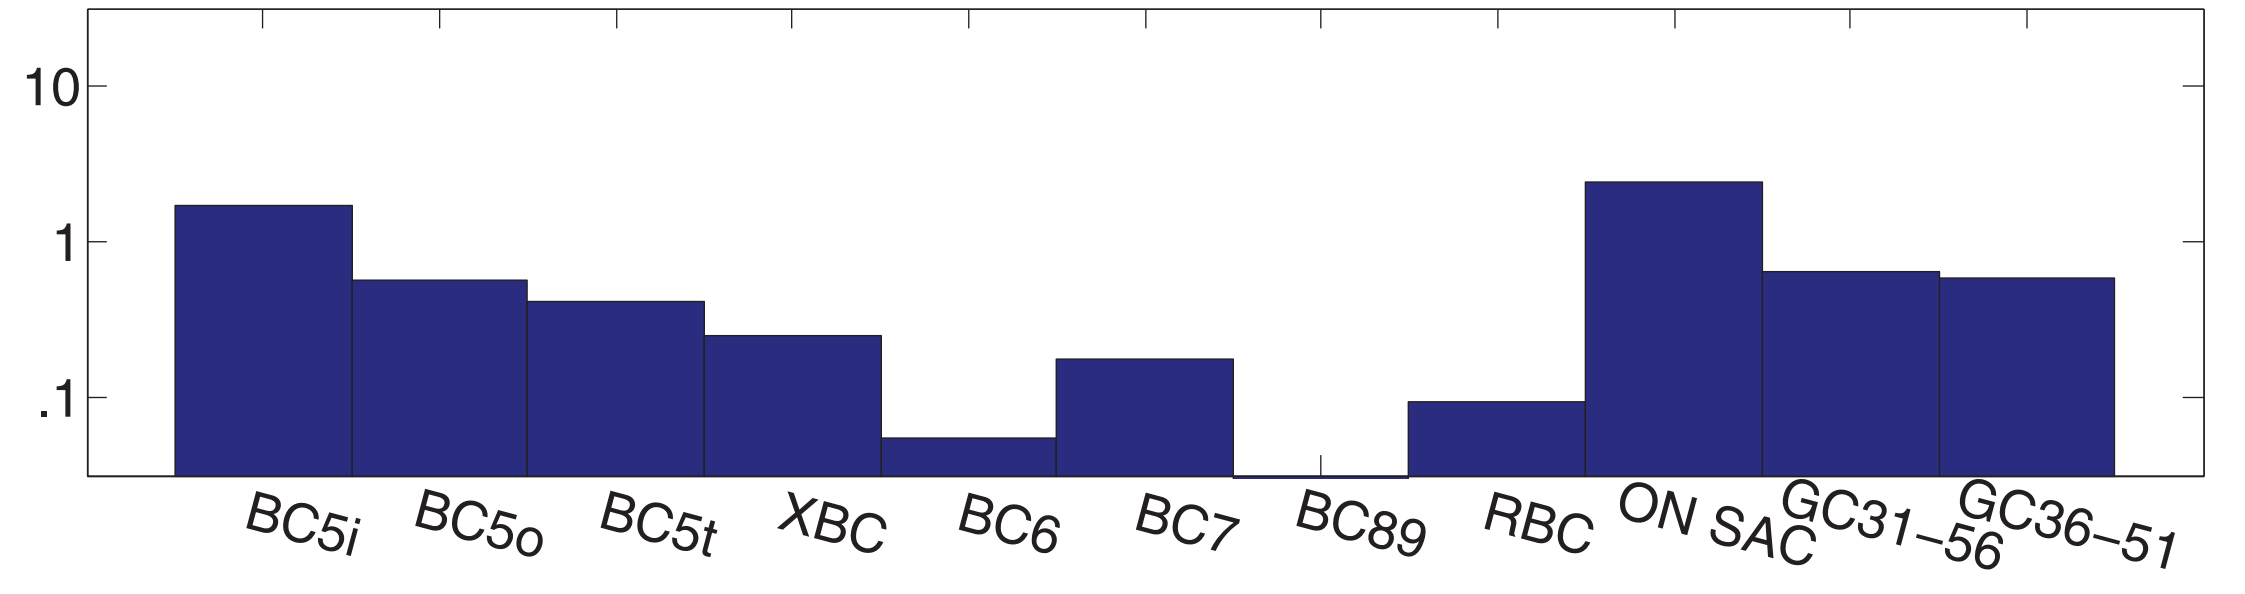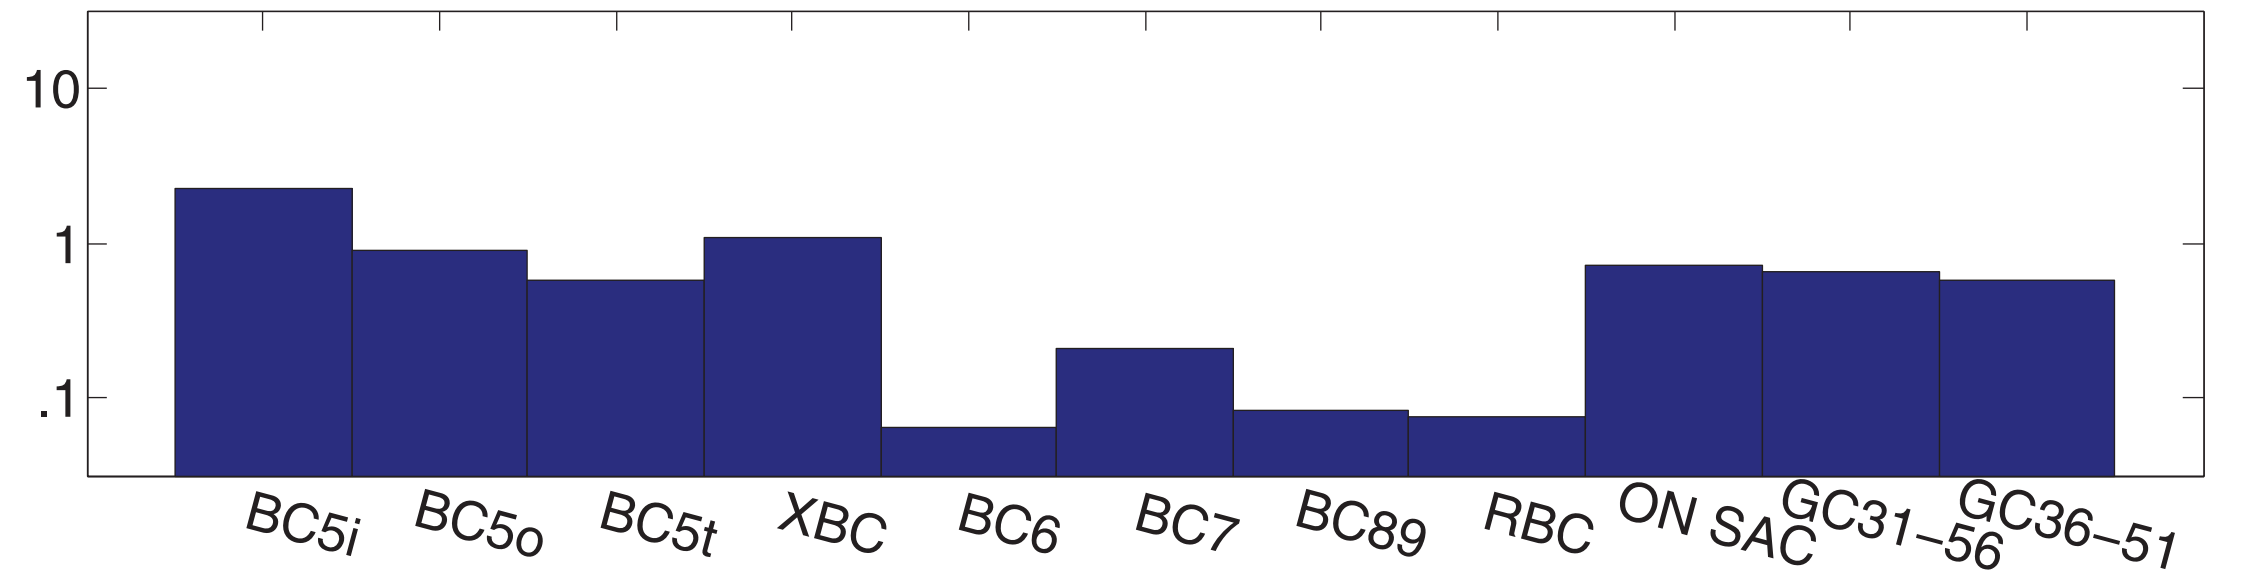

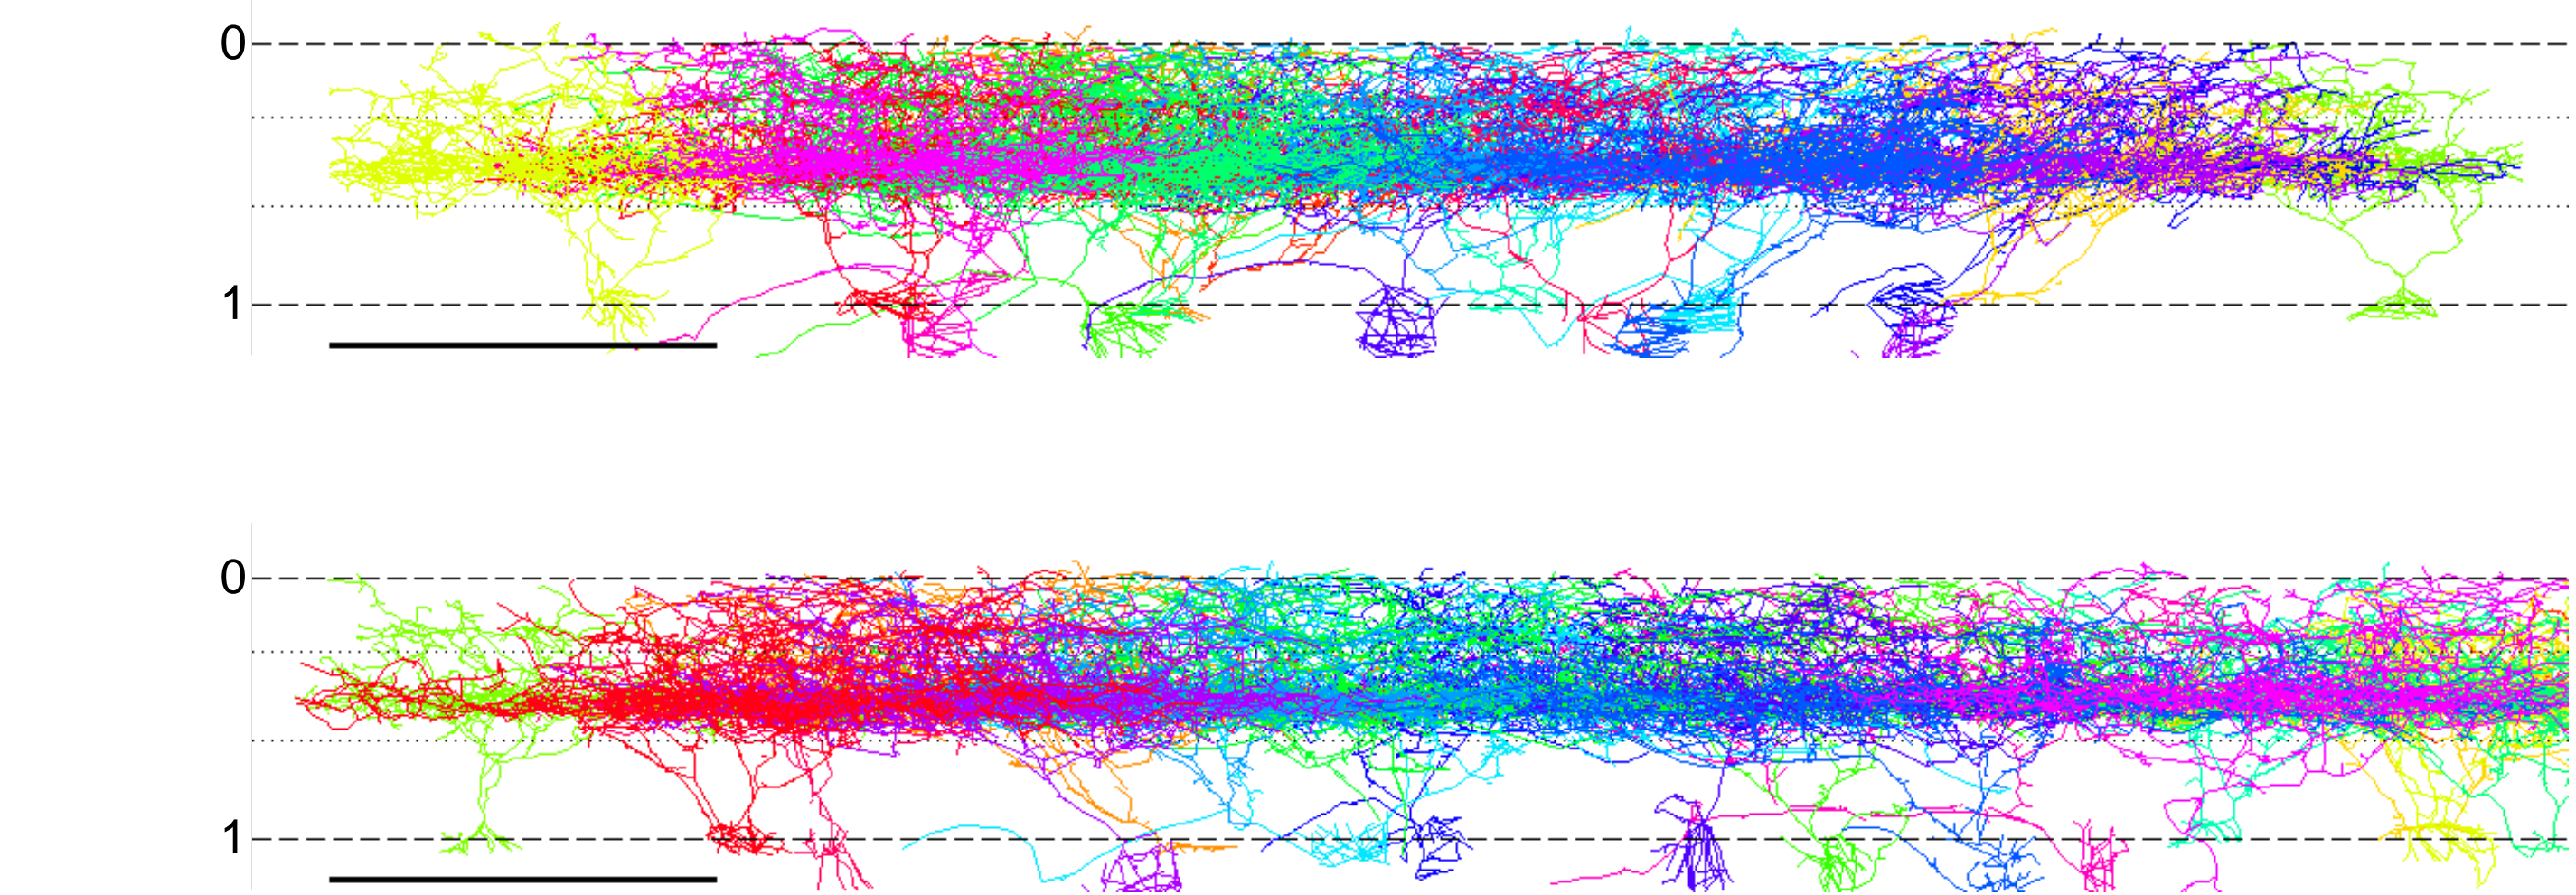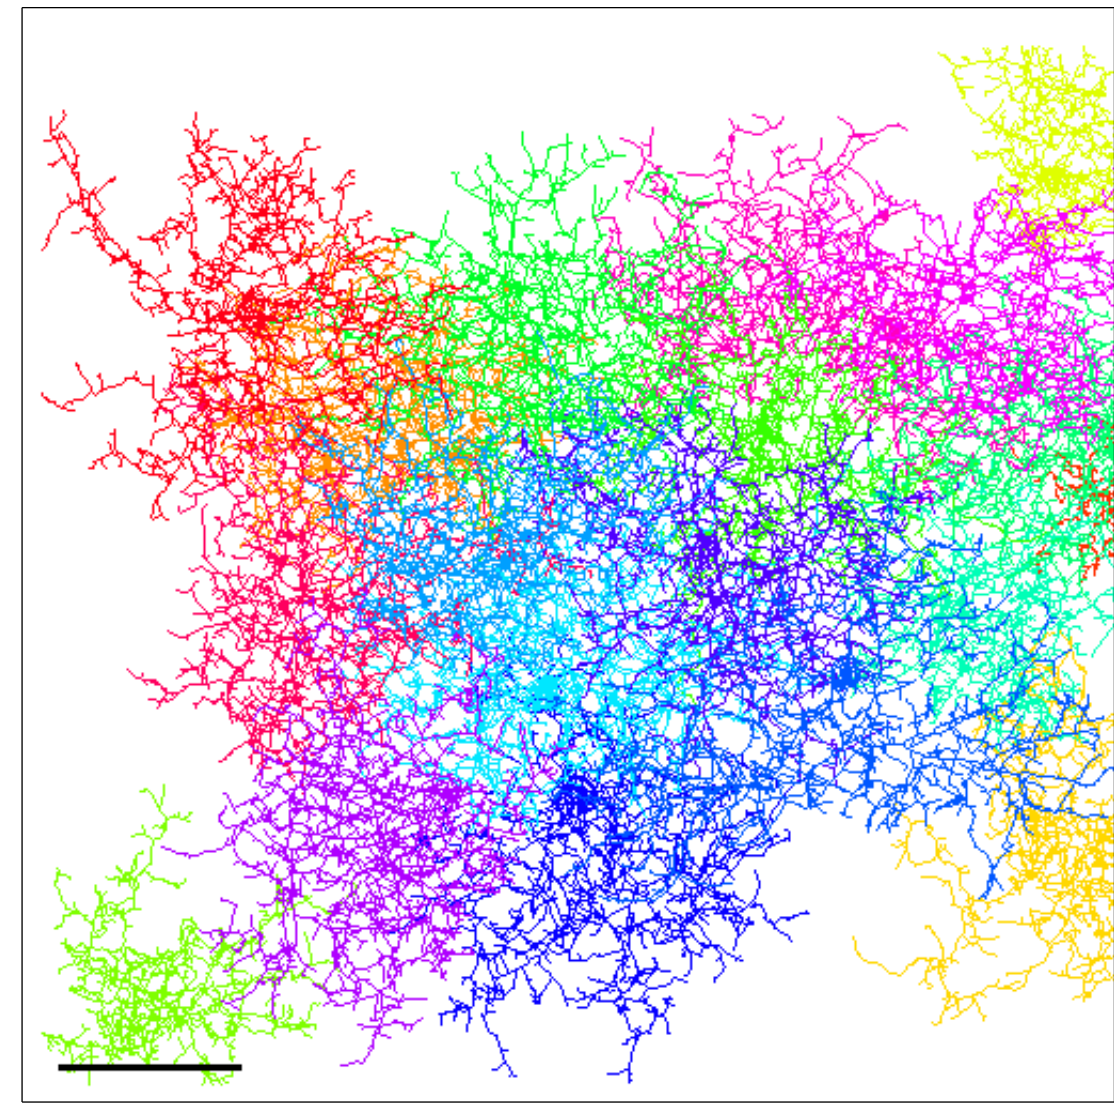

GC36-51

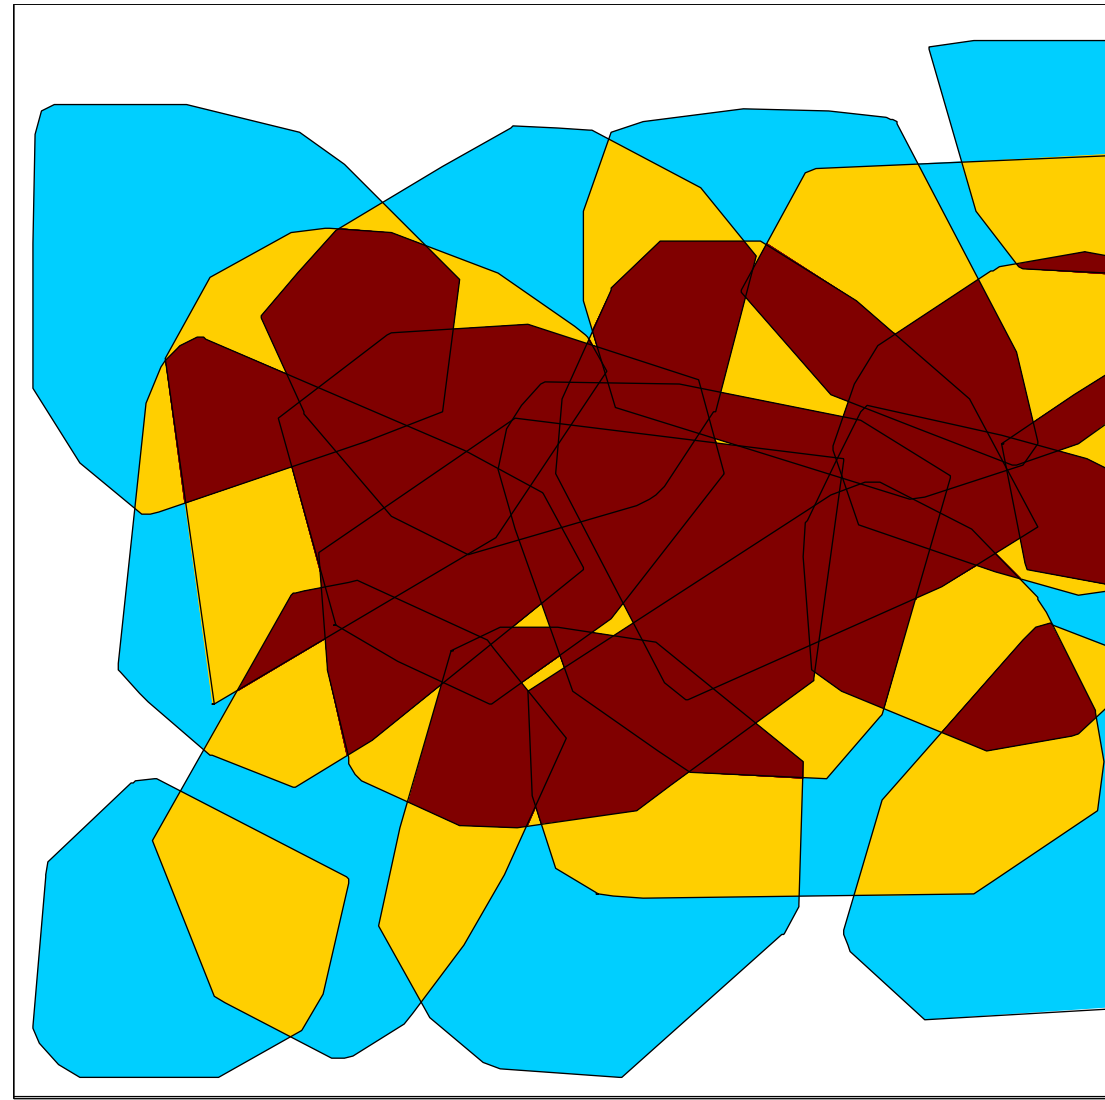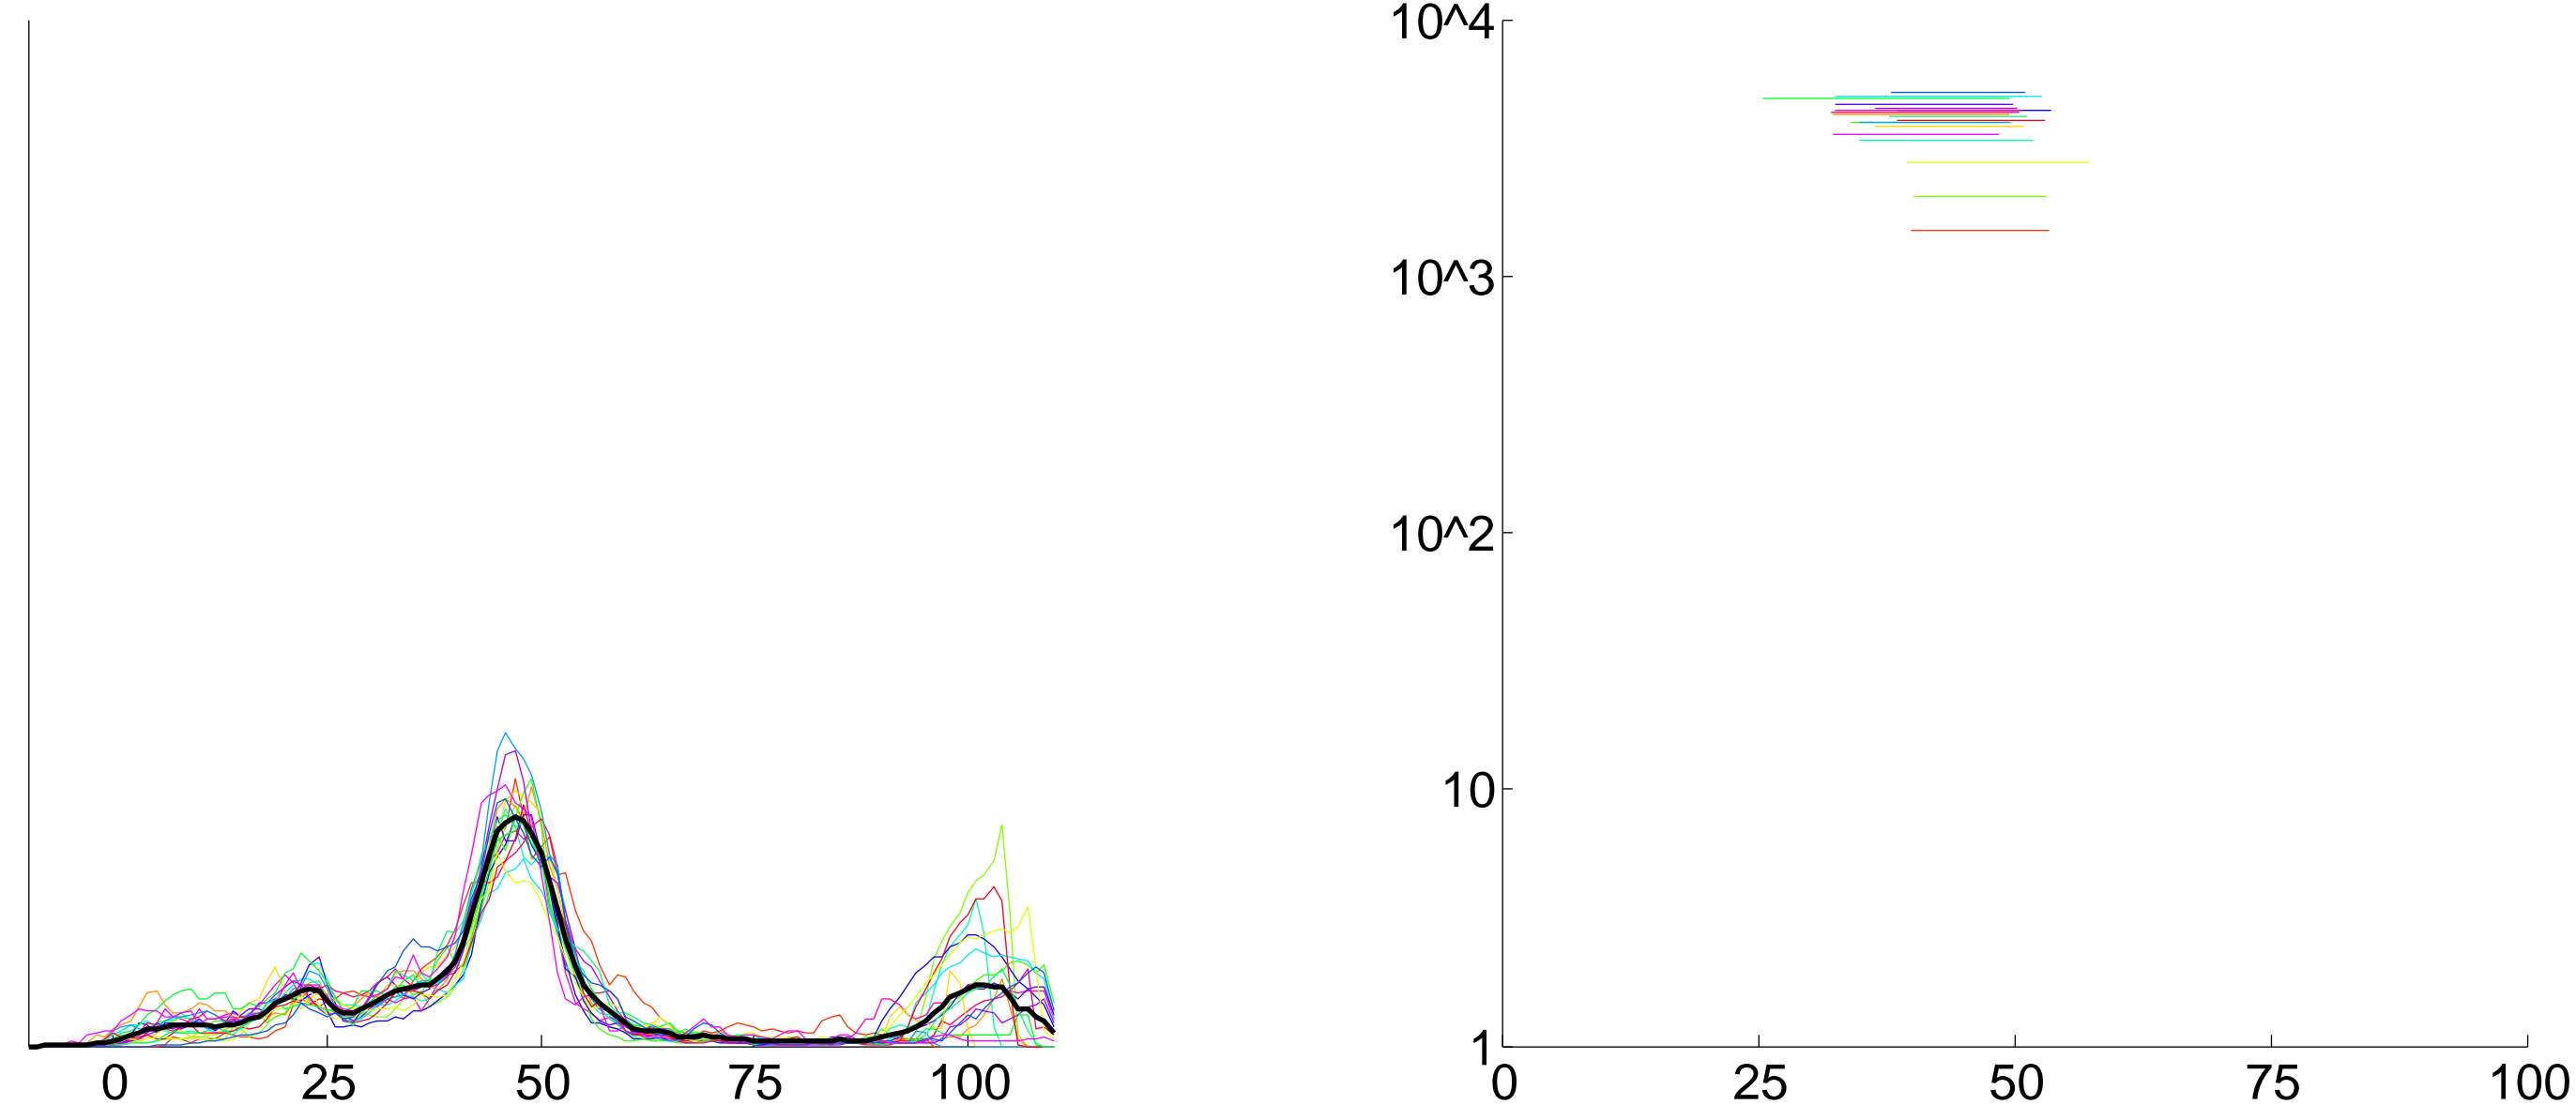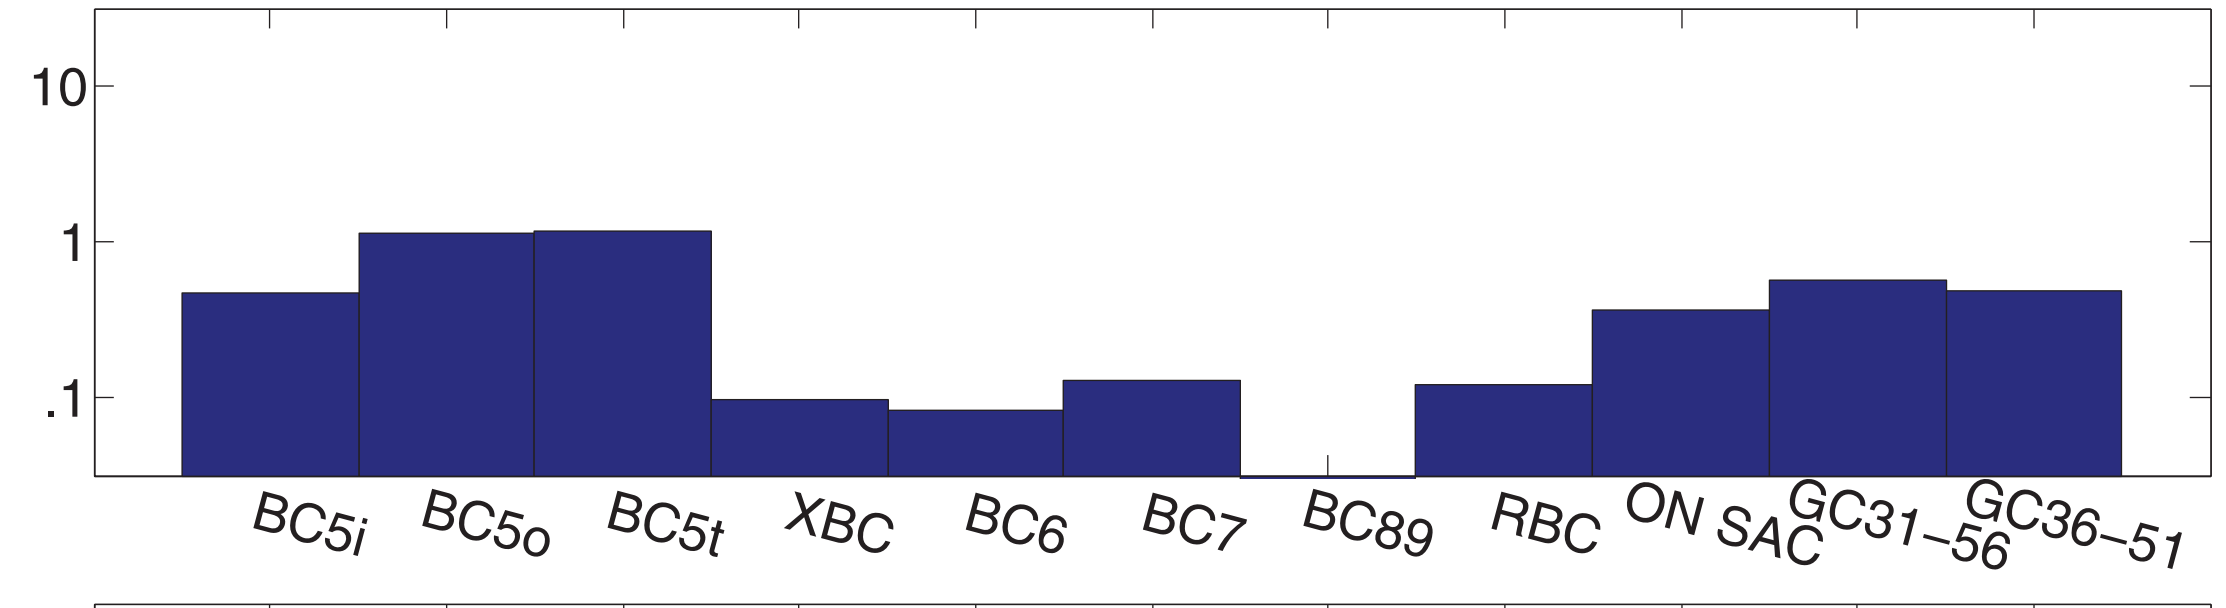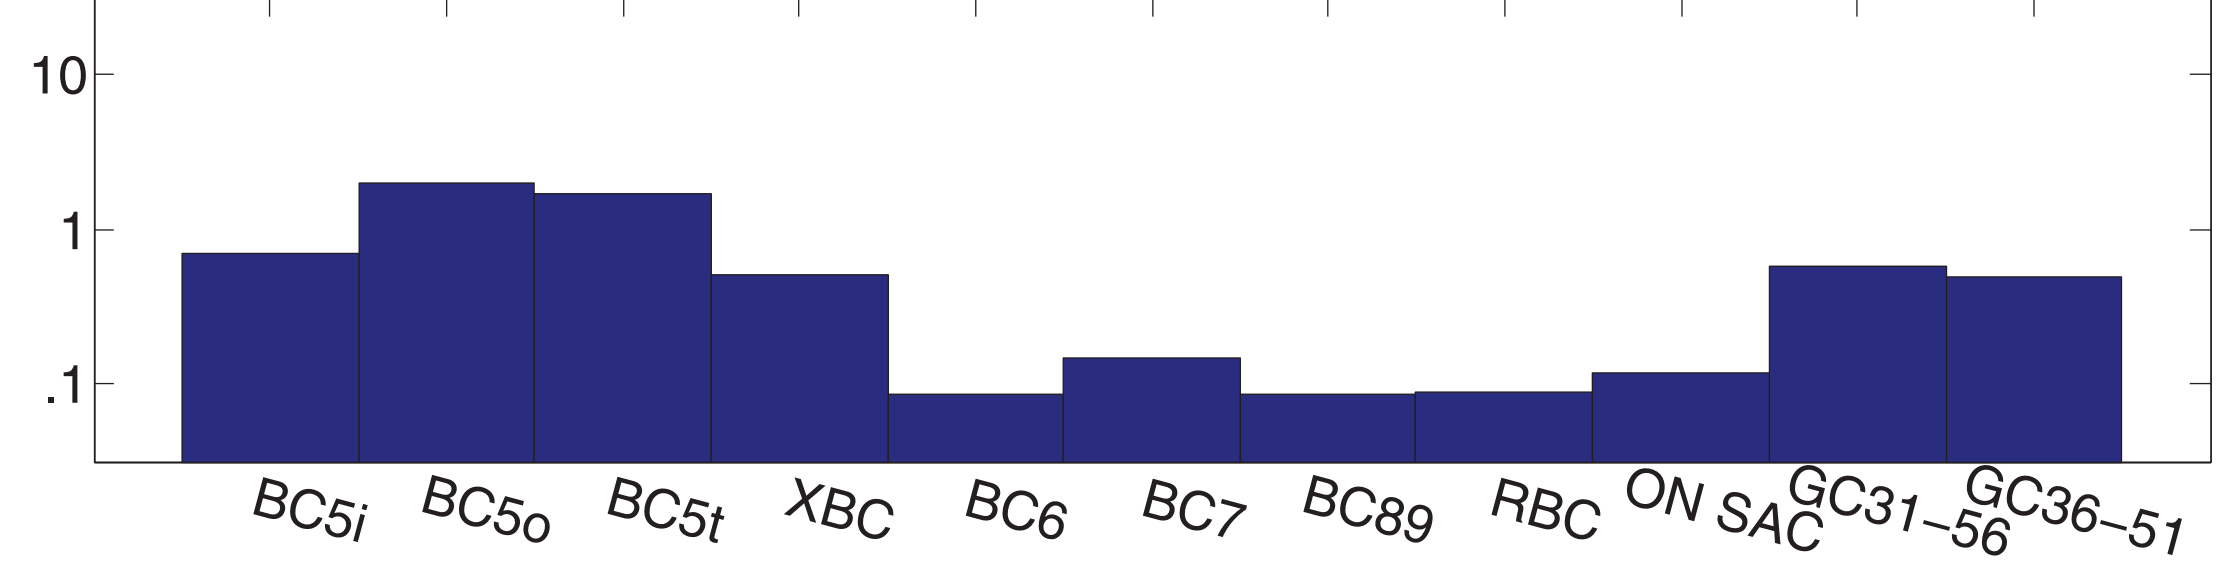

Supplement: NIHMS757638-supplement-2.pdf [file NIHMS757638-supplement-2.pdf]
